# Supplementary material for: Lead and noble gas isotopic constraints on the origin of Te-bearing adularia-sericite epithermal Au-Ag deposits in a calc-alkaline magmatic arc, NE China
Source: publisher site journal article supplement (doi:10.2138/am-2022-8552), 2024-01-25
Supplement: Supplementary file 1 [file 8552_suppB.xlsx]

## Sheet: Appendix B
Appendix B: Fluid inclusion, Pb isotope, and noble gas isotope data for “Lead and noble gas isotopic constraints on the origin of Te-bearing adularia-sericite epithermal Au-Ag deposits in a calc-alkaline magmatic arc, NE China” Shen Gao1, 2, Albert H. Hofstra3, Kezhang Qin2, 4, Xinyu Zou2, Michael J. Pribil3, Andrew G. Hunt3, Andrew H. Manning3, Heather A. Lowers3, Hong Xu1 1 School of Earth Scie…

## Sheet: Table B1
American Mineralogist: October 2024 Online Materials AM-24-108552 (use tabs to navigate to other tables)
Gao et al.: The origin and evolution of Te in epithermal Au-Ag deposits
Table B1. Detailed homogenization temperature and salinity of fluid inclusions from Sandaowanzi, Yongxin, Dong’an, and Tuanjiegou in the North Heilongjiang Belt, NE China.
Location	Sample no.	Area no.	Host mineral	Type	Stage	Ice melting (Tm, ice)	Homogenization (Th)	Salinity (NaCl wt.%)	R/RA	Reference
Sandaowanzi	130CM21-6	A1	Quartz	L-V	II-IV	-2	201	3.74126	0.34	This study
Sandaowanzi			Quartz		II-IV	-2	205	3.74126	0.34	This study
Sandaowanzi			Quartz		II-IV	-1.9	202	3.54538	0.34	This study
Sandaowanzi			Quartz		II-IV	-2	201	3.74126	0.34	This study
Sandaowanzi			Quartz		II-IV	-1.9	206	3.54538	0.34	This study
Sandaowanzi		A2	Quartz	L-V	II-IV	-1.5	210	2.77133	0.34	This study
Sandaowanzi			Quartz		II-IV	-1.5	212	2.77133	0.34	This study
Sandaowanzi			Quartz		II-IV	-1.6	210	2.96343	0.34	This study
Sandaowanzi			Quartz		II-IV	-1.5	212	2.77133	0.34	This study
Sandaowanzi	170CM13	A1	Quartz	L-V	II-IV	-1.6	243	2.96343	0.219	This study
Sandaowanzi			Quartz		II-IV	-1.6	248	2.96343	0.219	This study
Sandaowanzi			Quartz		II-IV	-1.5	253	2.77133	0.219	This study
Sandaowanzi			Quartz		II-IV	-1.4	255	2.58016	0.219	This study
Sandaowanzi			Quartz		II-IV	-1.4	257	2.58016	0.219	This study
Sandaowanzi		A2	Quartz	L-V	II-IV	-1.5	250	2.77133	0.219	This study
Sandaowanzi			Quartz		II-IV	-1.5	252	2.77133	0.219	This study
Sandaowanzi			Quartz		II-IV	-1.4	251	2.58016	0.219	This study
Sandaowanzi			Quartz		II-IV	-1.4	253	2.58016	0.219	This study
Sandaowanzi			Quartz		II-IV	-1.3	254	2.38992	0.219	This study
Sandaowanzi			Quartz		II-IV	-1.3	256	2.38992	0.219	This study
Sandaowanzi	90CM4	A1	Quartz	L-V	II-IV	-1.3	191	2.38992	0.126	This study
Sandaowanzi			Quartz		II-IV	-1.3	191	2.38992	0.126	This study
Sandaowanzi			Quartz		II-IV	-1.2	192	2.20061	0.126	This study
Sandaowanzi			Quartz		II-IV	-1.1	194	2.01222	0.126	This study
Sandaowanzi		A2	Quartz	L-V	II-IV	-1.4	200	2.58016	0.126	This study
Sandaowanzi			Quartz		II-IV	-1.4	204	2.58016	0.126	This study
Sandaowanzi			Quartz		II-IV	-1.3	204	2.38992	0.126	This study
Sandaowanzi			Quartz		II-IV	-1.3	205	2.38992	0.126	This study
Sandaowanzi		A3	Quartz	L-V	II-IV	-1.2	198	2.20061	0.126	This study
Sandaowanzi			Quartz		II-IV	-1.2	205	2.20061	0.126	This study
Sandaowanzi			Quartz		II-IV	-1.1	204	2.01222	0.126	This study
Yongxin	175-24-188.3	A_1	Quartz	L-V	II-IV	-4.5	251.4	8.95581	1.698	This study
Yongxin			Quartz		II-IV	-2.5	232.3	4.73495	1.698	This study
Yongxin			Quartz		II-IV	-2.4	233.1	4.53429	1.698	This study
Yongxin			Quartz		II-IV	-2.3	223.5	4.3346	1.698	This study
Yongxin			Quartz		II-IV	-3.2	250.1	6.16686	1.698	This study
Yongxin			Quartz		II-IV	-2.8	232.4	5.34276	1.698	This study
Yongxin			Quartz		II-IV	-3.1	230.1	5.95936	1.698	This study
Yongxin			Quartz		II-IV	-3.5	223.7	6.79533	1.698	This study
Yongxin			Quartz		II-IV	-3.3	225.9	6.37535	1.698	This study
Yongxin	177.5-5-241	A_1	Quartz	L-V	II-IV	-3.4	219.5	6.58484		This study
Yongxin			Quartz		II-IV	-3.2	220	6.16686		This study
Yongxin			Quartz		II-IV	-2.8	219.8	5.34276		This study
Yongxin			Quartz		II-IV	-3	221.5	5.75284		This study
Yongxin		A_2	Quartz	L-V	II-IV	-3.2	297	6.16686		This study
Yongxin			Quartz		II-IV	-2.8	289	5.34276		This study
Yongxin			Quartz		II-IV	-3	295	5.75284		This study
Yongxin			Quartz		II-IV	-3.4	297	6.58484		This study
Yongxin	180-29-232.5	A_1	Quartz	L-V	II-IV	-2.9	233.6	5.54731	0.148	This study
Yongxin			Quartz		II-IV	-3.1	222.5	5.95936	0.148	This study
Yongxin			Quartz		II-IV	-3.2	231.3	6.16686	0.148	This study
Yongxin			Quartz	L-V	II-IV	-2.8	226.2	5.34276	0.148	This study
Yongxin	175-14-161.4	A_1	Quartz		V	-5.5	128	11.2197		This study
Yongxin			Quartz		V	-5	130	10.0746		This study
Yongxin		A_2	Quartz	L-V	V	-3.1	200.6	5.95936		This study
Yongxin			Quartz		V	-3.3	206.7	6.37535		This study
Yongxin	175-8-149.3	A_1	Quartz	L-V	V	-2.2	189.2	4.13586		This study
Yongxin			Quartz		V	-1.8	190.1	3.35046		This study
Yongxin			Quartz		V	-1.7	207.4	3.15647		This study
Yongxin			Quartz		V	-2.1	206.2	3.93808		This study
Yongxin			Quartz		V	-1.8	205.4	3.35046		This study
Yongxin			Quartz		V	-3.6	193.9	7.00682		This study
Yongxin			Quartz		V	-2.8	195.7	5.34276		This study
Yongxin			Quartz		V	-3.2	192.6	6.16686		This study
Yongxin			Quartz		V	-2.3	197.8	4.3346		This study
Yongxin	177.5-6-145.2	A_1	Quartz	L-V	II-IV	-4.2	223.5	8.29696		This study
Yongxin			Quartz		II-IV	-3.1	222.4	5.95936		This study
Yongxin			Quartz		II-IV	-3.7	224.6	7.21931		This study
Yongxin	175-23-162.8	A_1	Quartz	L-V	II-IV	-3.6	182.3	7.00682		This study
Yongxin			Quartz		II-IV	-2.3	182.5	4.3346		This study
Yongxin			Quartz		II-IV	-3.2	183.6	6.16686		This study
Yongxin			Quartz		II-IV	-3.1	182.4	5.95936		This study
Yongxin			Quartz		II-IV	-2.1	182.7	3.93808		This study
Yongxin			Quartz		II-IV	-2.4	178.2	4.53429		This study
Yongxin			Quartz		II-IV	-2	194.3	3.74126		This study
Yongxin	180-30-161.3	A_1	Quartz	L-V	V	-2.1	117.2	3.93808		This study
Yongxin	177.5-8-135	A_1	Quartz	L-V	II-IV	-3.1	202.5	5.95936		This study
Yongxin			Quartz		II-IV	-4.5	197.5	8.95581		This study
Yongxin			Quartz		II-IV	-3.4	202.3	6.58484		This study
Yongxin			Quartz		II-IV	-3.2	206.2	6.16686		This study
Yongxin	177.5-7-146.3	A_1	Quartz	L-V	I	-3.8	340.5	7.43281		This study
Yongxin			Quartz		I	-4.2	341.2	8.29696		This study
Yongxin		A_2	Quartz	L-V	II-IV	-2.6	204.3	4.93658		This study
Yongxin			Quartz		II-IV	-3.2	207.6	6.16686		This study
Yongxin			Quartz		II-IV	-2.7	202.4	5.13918		This study
Yongxin		A_3	Quartz	L-V	I	-4	327.6	7.86285		This study
Yongxin			Quartz		I	-3.9	330.8	7.64732		This study
Yongxin			Quartz		I	-3.8	336.7	7.43281		This study
Yongxin	177.5-10.188.8	A_1	Quartz	L-V	II-IV	-3.3	234.9	6.37535		This study
Yongxin			Quartz		II-IV	-3.1	234.2	5.95936		This study
Yongxin			Quartz		II-IV	-2.9	240.1	5.54731		This study
Yongxin			Quartz		II-IV	-3.2	235.6	6.16686		This study
Yongxin		A_2	Quartz	L-V	V	-1.8	178.8	3.35046		This study
Yongxin			Quartz		V	-1.7	182.4	3.15647		This study
Yongxin			Quartz		V	-2	189.2	3.74126		This study
Yongxin	177.5-6-139	A_1	Quartz	L-V	V	-3.2	180.5	6.16686		This study
Yongxin			Quartz		V	-3.1	181.2	5.95936		This study
Yongxin			Quartz		V	-3	179.6	5.75284		This study
Yongxin			Quartz		V	-2.8	184.5	5.34276		This study
Yongxin	175-14-155	A_1	Quartz	L-V	V	-2.4	158.5	4.53429		This study
Yongxin			Quartz		V	-2.7	180.2	5.13918		This study
Yongxin			Quartz		V	-3.2	183.5	6.16686		This study
Yongxin			Quartz		V	-2.5	185.7	4.73495		This study
Yongxin	175-5-109.5	A_1	Quartz	L-V	II-IV	-3.2	270.7	6.16686		This study
Yongxin			Quartz		II-IV	-3.1	272.5	5.95936		This study
Yongxin	185-9-232.1	A_1	Quartz	L-V	II-IV	-3.2	229.9	6.16686		This study
Yongxin		A_2	Quartz	L-V	I	-3.1	340.2	5.95936		This study
Yongxin			Quartz		I	-3.4	341.3	6.58484		This study
Yongxin			Quartz		I	-3.9	338.5	7.64732		This study
Yongxin		A_3	Quartz	L-V	II-IV	-1.6	208.9	2.96343		This study
Yongxin			Quartz		II-IV	-2.2	216.7	4.13586		This study
Yongxin			Quartz		II-IV	-4.6	230.2	9.17749		This study
Yongxin			Quartz		II-IV	-3.8	227.6	7.43281		This study
Yongxin	185-14-182.5	A_1	Quartz	L-V	II-IV	-1.7	221.8	3.15647		This study
Yongxin			Quartz		II-IV	-2.9	217.9	5.54731		This study
Yongxin	180-30-161.3	A_1	Quartz	L-V	V	-2.2	120.8	4.13586		This study
Yongxin		A_2	Quartz	L-V	II-IV	-4.2	266.7	8.29696		This study
Yongxin			Quartz		II-IV	-3.6	274.7	7.00682		This study
Yongxin			Quartz		II-IV	-3.5	271.6	6.79533		This study
Yongxin		A_3	Quartz	L-V	V	-1.2	143.2	2.20061		This study
Dong'an	DA-23	A1	Fluorite	L-V	V	-1.2	146	2.20061	0.752	This study
Dong'an			Fluorite		V	-1.2	146	2.20061	0.752	This study
Dong'an			Fluorite		V	-1.1	145	2.01222	0.752	This study
Dong'an			Fluorite		V	-1.1	149	2.01222	0.752	This study
Dong'an			Fluorite		V	-1	152	1.82476	0.752	This study
Dong'an			Fluorite		V	-1.1	155	2.01222	0.752	This study
Dong'an			Fluorite		V	-1.1	156	2.01222	0.752	This study
Dong'an		A2	Fluorite	L-V	V	-1.3	146	2.38992	0.752	This study
Dong'an			Fluorite		V	-1.3	148	2.38992	0.752	This study
Dong'an			Fluorite		V	-1.3	155	2.38992	0.752	This study
Dong'an			Fluorite		V	-1.3	157	2.38992	0.752	This study
Dong'an		A3	Fluorite	L-V	V	-1.3	150	2.38992	0.752	This study
Dong'an			Fluorite		V	-1.3	155	2.38992	0.752	This study
Dong'an			Fluorite		V	-1.2	155	2.20061	0.752	This study
Dong'an			Fluorite		V	-1.2	159	2.20061	0.752	This study
Dong'an	DA-73	A1	Quartz	L-V	V	-1.4	189	2.58016		This study
Dong'an			Quartz		V	-1.3	190	2.38992		This study
Dong'an			Quartz		V	-1.4	190	2.58016		This study
Dong'an			Quartz		V	-1.4	189	2.58016		This study
Dong'an		A2	Quartz	L-V	II-IV	-1.5	250	2.77133		This study
Dong'an			Quartz		II-IV	-1.5	249	2.77133		This study
Dong'an			Quartz		II-IV	-1.4	251	2.58016		This study
Dong'an			Quartz		II-IV	-1.4	250	2.58016		This study
Dong'an			Quartz		II-IV	-1.4	251	2.58016		This study
Dong'an	DA-144	A1	Quartz	L-V	II-IV	-1.1	233	2.01222		This study
Dong'an			Quartz		II-IV	-1.1	233	2.01222		This study
Dong'an			Quartz		II-IV	-1.1	235	2.01222		This study
Dong'an			Quartz		II-IV	-1.1	234	2.01222		This study
Dong'an			Quartz		II-IV	-1.1	240	2.01222		This study
Dong'an	DA-79	A1	Quartz	L-V	II-IV	-1.5	240	2.77133		This study
Dong'an			Quartz		II-IV	-1.5	240	2.77133		This study
Dong'an			Quartz		II-IV	-1.5	241	2.77133		This study
Dong'an			Quartz		II-IV	-1.5	241	2.77133		This study
Dong'an			Quartz		II-IV	-1.5	245	2.77133		This study
Dong'an			Quartz		II-IV	-1.5	244	2.77133		This study
Dong'an	DA-106	A1	Quartz	L-V	I	-2.4	265	4.53429		This study
Dong'an			Quartz		I	-2.3	264	4.3346		This study
Dong'an			Quartz		I	-2.4	266	4.53429		This study
Dong'an			Quartz		I	-2.4	265	4.53429		This study
Dong'an		A2	Quartz	L-V	I	-1.5	262	2.77133		This study
Dong'an			Quartz		I	-1.6	264	2.96343		This study
Dong'an			Quartz		I	-1.6	270	2.96343		This study
Dong'an			Quartz		I	-1.5	262	2.77133		This study
Dong'an			Quartz		I	-1.6	265	2.96343		This study
Dong'an	DA-55	A1	Quartz	L-V	V	-1.7	171	3.15647		This study
Dong'an			Quartz		V	-1.7	171	3.15647		This study
Dong'an			Quartz		V	-1.6	172	2.96343		This study
Dong'an			Quartz		V	-1.6	172	2.96343		This study
Dong'an		A2	Quartz	L-V	V	-1.7	170	3.15647		This study
Dong'an			Quartz		V	-1.7	171	3.15647		This study
Dong'an			Quartz		V	-1.7	174	3.15647		This study
Dong'an			Quartz		V	-1.7	174	3.15647		This study
Dong'an	DA-61	A1	Quartz	L-V	II-IV	-1.3	234	2.38992	0.395	This study
Dong'an			Quartz		II-IV	-1.1	234	2.01222	0.395	This study
Dong'an			Quartz		II-IV	-1.1	236	2.01222	0.395	This study
Dong'an			Quartz		II-IV	-1	238	1.82476	0.395	This study
Dong'an			Quartz		II-IV	-1	241	1.82476	0.395	This study
Dong'an			Quartz		II-IV	-1	241	1.82476	0.395	This study
Dong'an			Quartz		II-IV	-1	242	1.82476	0.395	This study
Dong'an		A2	Quartz	L-V	II-IV	-1.1	224	2.01222	0.395	This study
Dong'an			Quartz		II-IV	-1.1	233	2.01222	0.395	This study
Dong'an			Quartz		II-IV	-1.1	241	2.01222	0.395	This study
Dong'an			Quartz		II-IV	-1.1	235	2.01222	0.395	This study
Dong'an			Quartz		II-IV	-1.1	237	2.01222	0.395	This study
Dong'an			Quartz		II-IV	-1.1	242	2.01222	0.395	This study
Dong'an	DA-103	A1	Quartz	L-V	II-IV	-1.6	223	2.96343	0.926	This study
Dong'an			Quartz		II-IV	-1.6	223	2.96343	0.926	This study
Dong'an			Quartz		II-IV	-1.4	224	2.58016	0.926	This study
Dong'an			Quartz		II-IV	-1.4	226	2.58016	0.926	This study
Dong'an			Quartz		II-IV	-1.4	226	2.58016	0.926	This study
Dong'an			Quartz		II-IV	-1.2	230	2.20061	0.926	This study
Dong'an			Quartz		II-IV	-1.2	230	2.20061	0.926	This study
Dong'an			Quartz		II-IV	-1.2	231	2.20061	0.926	This study
Dong'an			Quartz		II-IV	-1.2	230	2.20061	0.926	This study
Dong'an			Quartz		II-IV	-1.2	230	2.20061	0.926	This study
Dong'an	DA-103	A2	Quartz	L-V	II-IV	-1.4	230	2.58016	0.926	This study
Dong'an			Quartz		II-IV	-1.4	232	2.58016	0.926	This study
Dong'an			Quartz		II-IV	-1.3	240	2.38992	0.926	This study
Dong'an			Quartz		II-IV	-1.3	241	2.38992	0.926	This study
Dong'an			Quartz		II-IV	-1.2	242	2.20061	0.926	This study
Dong'an			Quartz		II-IV	-1.2	246	2.20061	0.926	This study
Dong'an	DA-92	A1	Quartz	L-V	I	-2.6	270	4.93658	0.028	This study
Dong'an			Quartz		I	-2.5	275	4.73495	0.028	This study
Dong'an			Quartz		I	-2.6	276	4.93658	0.028	This study
Dong'an			Quartz		I	-2.4	290	4.53429	0.028	This study
Dong'an		A2	Quartz	L-V	I	-1.5	264	2.77133	0.028	This study
Dong'an			Quartz		I	-1.5	265	2.77133	0.028	This study
Dong'an			Quartz		I	-1.4	265	2.58016	0.028	This study
Dong'an			Quartz		I	-1.4	264	2.58016	0.028	This study
Dong'an			Quartz		I	-1.4	260	2.58016	0.028	This study
Dong'an			Quartz		I	-1.4	261	2.58016	0.028	This study
Tuanjiegou	TJG-011	A1	Quartz	L-V	II-IV	-1.9	210	3.54538	0.097	This study
Tuanjiegou			Quartz		II-IV	-1.9	209	3.54538	0.097	This study
Tuanjiegou			Quartz		II-IV	-1.8	210	3.35046	0.097	This study
Tuanjiegou			Quartz		II-IV	-1.3	208	2.38992	0.097	This study
Tuanjiegou			Quartz		II-IV	-1.3	215	2.38992	0.097	This study
Tuanjiegou			Quartz		II-IV	-1.2	214	2.20061	0.097	This study
Tuanjiegou	TJG-015	A1	Quartz	L-V	II-IV	-1.9	229	3.54538	0.135	This study
Tuanjiegou			Quartz		II-IV	-1.9	231	3.54538	0.135	This study
Tuanjiegou			Quartz		II-IV	-1.9	229	3.54538	0.135	This study
Tuanjiegou		A2	Quartz	L-V	II-IV	-1.8	234	3.35046	0.135	This study
Tuanjiegou			Quartz		II-IV	-1.8	235	3.35046	0.135	This study
Tuanjiegou			Quartz		II-IV	-1.8	234	3.35046	0.135	This study
Tuanjiegou		A3	Quartz	L-V	II-IV	-2.3	230	4.3346	0.135	This study
Tuanjiegou			Quartz		II-IV	-2.3	235	4.3346	0.135	This study
Tuanjiegou			Quartz		II-IV	-2.1	238	3.93808	0.135	This study
Tuanjiegou	TJG-021	A1	Quartz	L-V	II-IV	-2.6	230	4.93658		This study
Tuanjiegou			Quartz		II-IV	-2.6	232	4.93658		This study
Tuanjiegou			Quartz		II-IV	-2.6	234	4.93658		This study
Tuanjiegou			Quartz		II-IV	-2.6	234	4.93658		This study
Tuanjiegou			Quartz		II-IV	-2.5	252	4.73495		This study
Tuanjiegou			Quartz		II-IV	-2.5	246	4.73495		This study
Tuanjiegou			Quartz		II-IV	-2	254	3.74126		This study
Tuanjiegou	TJG-006	A1	Calcite	L-V	V	-1.8	170	3.35046	0.528	This study
Tuanjiegou			Calcite		V	-1.8	171	3.35046	0.528	This study
Tuanjiegou			Calcite		V	-1.7	169	3.15647	0.528	This study
Tuanjiegou			Calcite		V	-1.7	171	3.15647	0.528	This study
Tuanjiegou			Calcite		V	-1.7	162	3.15647	0.528	This study
Tuanjiegou		A2	Calcite	L-V	V	-1.8	165	3.35046	0.528	This study
Tuanjiegou			Calcite		V	-1.8	164	3.35046	0.528	This study
Tuanjiegou			Calcite		V	-1.6	162	2.96343	0.528	This study
Tuanjiegou			Calcite		V	-1.6	171	2.96343	0.528	This study
Tuanjiegou			Calcite		V	-1.2	165	2.20061	0.528	This study
Tuanjiegou	TJG-025	A1	Quartz	L-V	II-IV	-4	225	7.86285		This study
Tuanjiegou			Quartz		II-IV	-3.5	220	6.79533		This study
Tuanjiegou			Quartz		II-IV	-2.5	215	4.73495		This study
Tuanjiegou			Quartz		II-IV	-3	225	5.75284		This study
Tuanjiegou			Quartz		II-IV	-3.5	220	6.79533		This study
Tuanjiegou			Quartz		II-IV	-3.8	225	7.43281		This study
Tuanjiegou		A2	Quartz	L-V	II-IV	-2	215	3.74126		This study
Tuanjiegou			Quartz		II-IV	-2	220	3.74126		This study
Tuanjiegou			Quartz		II-IV	-1.8	224	3.35046		This study
Tuanjiegou			Quartz		II-IV	-1.8	225	3.35046		This study
Tuanjiegou			Quartz		II-IV	-1.5	230	2.77133		This study
Tuanjiegou			Quartz		II-IV	-1.2	236	2.20061		This study
Tuanjiegou	TJG-026	A1	Quartz	L-V	I	-1.2	262	2.20061		This study
Tuanjiegou			Quartz		I	-1.2	264	2.20061		This study
Tuanjiegou			Quartz		I	-1.1	265	2.01222		This study
Tuanjiegou			Quartz		I	-1.1	270	2.01222		This study
Tuanjiegou			Quartz		I	-1.1	261	2.01222		This study
Tuanjiegou			Quartz		I	-1.1	269	2.01222		This study
Tuanjiegou		A2	Quartz	L-V	I	-1.1	269	2.01222		This study
Tuanjiegou			Quartz		I	-1.1	271	2.01222		This study
Tuanjiegou			Quartz		I	-1.1	272	2.01222		This study
Tuanjiegou			Quartz		I	-1.1	280	2.01222		This study
Tuanjiegou			Quartz		I	-1	279	1.82476		This study
Tuanjiegou			Quartz		I	-1.2	269	2.20061		This study
Tuanjiegou			Quartz		I	-1.1	271	2.01222		This study
Sandaowanzi	50CM23-7	A_1	Quartz	L-V	II-IV	-0.5	186	0.90112		Gao 2017
Sandaowanzi			Quartz		II-IV	-0.5	192.9	0.90112		Gao 2017
Sandaowanzi			Quartz		II-IV	-0.7	193.1	1.26785		Gao 2017
Sandaowanzi			Quartz		II-IV	-0.6	193.4	1.08403		Gao 2017
Sandaowanzi			Quartz		II-IV	-0.6	193.4	1.08403		Gao 2017
Sandaowanzi			Quartz		II-IV	-0.8	202.6	1.45257		Gao 2017
Sandaowanzi	50CM35-5-1	A_1	Quartz	L-V	II-IV	-0.7	234.4	1.26785		Gao 2017
Sandaowanzi			Quartz		II-IV	-1.5	234.9	2.77133		Gao 2017
Sandaowanzi			Quartz		II-IV	-2.2	243.1	4.13586		Gao 2017
Sandaowanzi			Quartz		II-IV	-1.2	246.4	2.20061		Gao 2017
Sandaowanzi			Quartz		II-IV	-0.7	251.5	1.26785		Gao 2017
Sandaowanzi			Quartz		II-IV	-0.7	253.9	1.26785		Gao 2017
Sandaowanzi			Quartz		II-IV	-0.7	261.7	1.26785		Gao 2017
Sandaowanzi	50CM37-9	A_1	Quartz	L-V	I	-0.7	277.5	1.26785		Gao 2017
Sandaowanzi			Quartz		I	-0.7	285.8	1.26785		Gao 2017
Sandaowanzi			Quartz		I	-1.1	261.8	2.01222		Gao 2017
Sandaowanzi			Quartz		I	-0.6	262.7	1.08403		Gao 2017
Sandaowanzi			Quartz		I	-1	265.2	1.82476		Gao 2017
Sandaowanzi			Quartz		I	-1	268	1.82476		Gao 2017
Sandaowanzi			Quartz		I	-1.1	268.4	2.01222		Gao 2017
Sandaowanzi			Quartz		I	-0.8	275.8	1.45257		Gao 2017
Sandaowanzi			Quartz		I	-1	286.4	1.82476		Gao 2017
Sandaowanzi	90CM29-5	A_1	Quartz	L-V	II-IV	-0.9	235.4	1.63821		Gao 2017
Sandaowanzi			Quartz		II-IV	-0.8	235.8	1.45257		Gao 2017
Sandaowanzi			Quartz		II-IV	-0.5	239.4	0.90112		Gao 2017
Sandaowanzi		A_2	Quartz	L-V	I	-0.8	261	1.45257		Gao 2017
Sandaowanzi			Quartz		I	-0.9	263.2	1.63821		Gao 2017
Sandaowanzi			Quartz		I	-0.7	264.8	1.26785		Gao 2017
Sandaowanzi			Quartz		I	-0.9	273.6	1.63821		Gao 2017
Sandaowanzi	110CM21-S4-1	A_1	Quartz	L-V	II-IV	-0.9	259.4	1.63821		Gao 2017
Sandaowanzi			Quartz		II-IV	-1.1	262.8	2.01222		Gao 2017
Sandaowanzi			Quartz		II-IV	-1	258.3	1.82476		Gao 2017
Sandaowanzi			Quartz		II-IV	-0.8	267.6	1.45257		Gao 2017
Sandaowanzi			Quartz		II-IV	-0.8	270	1.45257		Gao 2017
Sandaowanzi			Quartz		II-IV	-1.2	241.5	2.20061		Gao 2017
Sandaowanzi			Quartz		II-IV	-1	256.3	1.82476		Gao 2017
Sandaowanzi	130CM19-5	A_1	Quartz	L-V	II-IV	-0.7	273.1	1.26785		Gao 2017
Sandaowanzi			Quartz		II-IV	-0.8	270.6	1.45257		Gao 2017
Sandaowanzi			Quartz		II-IV	-0.7	275.4	1.26785		Gao 2017
Sandaowanzi			Quartz		II-IV	-0.8	281.8	1.45257		Gao 2017
Sandaowanzi			Quartz		II-IV	-1.1	245.1	2.01222		Gao 2017
Sandaowanzi			Quartz		II-IV	-0.9	237.6	1.63821		Gao 2017
Sandaowanzi			Quartz		II-IV	-0.8	240.7	1.45257		Gao 2017
Sandaowanzi			Quartz		II-IV	-0.5	266.5	0.90112		Gao 2017
Sandaowanzi			Quartz		II-IV	-0.8	254.3	1.45257		Gao 2017
Sandaowanzi	130CM23-15	A_1	Quartz	L-V	II-IV	-1.6	237.8	2.96343	0.41	Gao 2017
Sandaowanzi			Quartz		II-IV	-1.8	259.8	3.35046	0.41	Gao 2017
Sandaowanzi			Quartz		II-IV	-1.9	260.3	3.54538	0.41	Gao 2017
Sandaowanzi			Quartz		II-IV	-1.2	262.2	2.20061	0.41	Gao 2017
Sandaowanzi			Quartz		II-IV	-0.9	241.6	1.63821	0.41	Gao 2017
Sandaowanzi			Quartz		II-IV	-0.8	240.9	1.45257	0.41	Gao 2017
Sandaowanzi			Quartz		II-IV	-1.6	231.4	2.96343	0.41	Gao 2017
Sandaowanzi			Quartz		II-IV	-0.9	242.7	1.63821	0.41	Gao 2017
Sandaowanzi			Quartz		II-IV	-1.8	243.1	3.35046	0.41	Gao 2017
Sandaowanzi			Quartz		II-IV	-1.8	245.6	3.35046	0.41	Gao 2017
Sandaowanzi			Quartz		II-IV	-0.9	232.5	1.63821	0.41	Gao 2017
Sandaowanzi			Quartz		II-IV	-1.1	223.9	2.01222	0.41	Gao 2017
Sandaowanzi			Quartz		II-IV	-0.9	220.7	1.63821	0.41	Gao 2017
Sandaowanzi			Quartz		II-IV	-0.9	222.6	1.63821	0.41	Gao 2017
Sandaowanzi			Quartz		II-IV	-0.8	233.8	1.45257	0.41	Gao 2017
Sandaowanzi			Quartz		II-IV	-0.9	249.1	1.63821	0.41	Gao 2017
Sandaowanzi			Quartz		II-IV	-0.9	237.6	1.63821	0.41	Gao 2017
Sandaowanzi			Quartz		II-IV	-0.8	250.4	1.45257	0.41	Gao 2017
Sandaowanzi			Quartz		II-IV	-0.8	247.6	1.45257	0.41	Gao 2017
Sandaowanzi			Quartz		II-IV	-0.8	253	1.45257	0.41	Gao 2017
Sandaowanzi			Quartz		II-IV	-0.9	240.6	1.63821	0.41	Gao 2017
Sandaowanzi			Quartz		II-IV	-0.8	248.7	1.45257	0.41	Gao 2017
Sandaowanzi			Quartz		II-IV	-0.8	239.7	1.45257	0.41	Gao 2017
Sandaowanzi	170CM15	A_1	Quartz	L-V	II-IV	-0.5	193	0.90112		Gao 2017
Sandaowanzi			Quartz		II-IV	-2.3	194.5	4.3346		Gao 2017
Sandaowanzi			Quartz		II-IV	-0.7	205	1.26785		Gao 2017
Sandaowanzi			Quartz		II-IV	-1.9	207.7	3.54538		Gao 2017
Sandaowanzi			Quartz		II-IV	-0.5	214	0.90112		Gao 2017
Sandaowanzi			Quartz		II-IV	-0.6	214	1.08403		Gao 2017
Sandaowanzi			Quartz		II-IV	-0.5	214	0.90112		Gao 2017
Sandaowanzi		A_2	Quartz	L-V	I	-0.7	260.3	1.26785		Gao 2017
Sandaowanzi			Quartz		I	-0.5	264.2	0.90112		Gao 2017
Sandaowanzi			Quartz		I	-0.3	267	0.537993		Gao 2017
Sandaowanzi			Quartz		I	-0.3	267	0.537993		Gao 2017
Sandaowanzi			Quartz		I	-0.3	267	0.537993		Gao 2017
Sandaowanzi			Quartz		I	-0.3	267	0.537993		Gao 2017
Sandaowanzi			Quartz		I	-0.7	270	1.26785		Gao 2017
Sandaowanzi			Quartz		I	-0.8	271	1.45257		Gao 2017
Sandaowanzi			Quartz		I	-0.6	271.2	1.08403		Gao 2017
Sandaowanzi			Quartz		I	-0.4	272.3	0.719108		Gao 2017
Sandaowanzi			Quartz		I	-0.6	274	1.08403		Gao 2017
Sandaowanzi			Quartz		I	-0.5	274.7	0.90112		Gao 2017
Sandaowanzi			Quartz		I	-0.5	274.8	0.90112		Gao 2017
Sandaowanzi			Quartz		I	-0.5	275	0.90112		Gao 2017
Sandaowanzi			Quartz		I	-0.5	275	0.90112		Gao 2017
Sandaowanzi			Quartz		I	-0.7	275.7	1.26785		Gao 2017
Sandaowanzi			Quartz		I	-0.5	277.3	0.90112		Gao 2017
Sandaowanzi			Quartz		I	-0.7	279	1.26785		Gao 2017
Sandaowanzi			Quartz		I	-0.7	279.2	1.26785		Gao 2017
Sandaowanzi			Quartz		I	-0.7	279.3	1.26785		Gao 2017
Sandaowanzi			Quartz		I	-0.6	279.6	1.08403		Gao 2017
Sandaowanzi			Quartz		I	-0.6	280.05	1.08403		Gao 2017
Sandaowanzi			Quartz		I	-0.7	280.5	1.26785		Gao 2017
Sandaowanzi			Quartz		I	-0.5	281.5	0.90112		Gao 2017
Sandaowanzi			Quartz		I	-1.5	285.1	2.77133		Gao 2017
Sandaowanzi	170CM5-5-2	A_1	Quartz	L-V	I	-4.5	235.6	8.95581		Gao 2017
Sandaowanzi			Quartz		I	-3.5	249.8	6.79533		Gao 2017
Sandaowanzi			Quartz		I	-4.8	256.6	9.62397		Gao 2017
Sandaowanzi			Quartz		I	-2.2	258.9	4.13586		Gao 2017
Sandaowanzi			Quartz		I	-2.9	265.4	5.54731		Gao 2017
Sandaowanzi			Quartz		I	-2.2	265.6	4.13586		Gao 2017
Sandaowanzi			Quartz		I	-0.9	267.7	1.63821		Gao 2017
Sandaowanzi			Quartz		I	-1.4	268.9	2.58016		Gao 2017
Sandaowanzi			Quartz		I	-2.5	273.2	4.73495		Gao 2017
Sandaowanzi			Quartz		I	-2.2	274.2	4.13586		Gao 2017
Sandaowanzi			Quartz		I	-3.2	279.3	6.16686		Gao 2017
Sandaowanzi			Quartz		I	-1.2	282.1	2.20061		Gao 2017
Sandaowanzi			Quartz		I	-3.9	283.9	7.64732		Gao 2017
Sandaowanzi	210CM-4	A_1	Quartz	L-V	II-IV	-0.8	200.8	1.45257		Gao 2017
Sandaowanzi			Quartz		II-IV	-0.5	206.4	0.90112		Gao 2017
Sandaowanzi			Quartz		II-IV	-2	209.5	3.74126		Gao 2017
Sandaowanzi			Quartz		II-IV	-0.8	219.7	1.45257		Gao 2017
Sandaowanzi			Quartz		II-IV	-0.5	220.4	0.90112		Gao 2017
Sandaowanzi			Quartz		II-IV	-0.9	226.9	1.63821		Gao 2017
Sandaowanzi			Quartz		II-IV	-0.7	229.3	1.26785		Gao 2017
Sandaowanzi			Quartz		II-IV	-0.6	229.8	1.08403		Gao 2017
Sandaowanzi			Quartz		II-IV	-0.6	230.3	1.08403		Gao 2017
Sandaowanzi			Quartz		II-IV	-0.8	230.6	1.45257		Gao 2017
Sandaowanzi			Quartz		II-IV	-0.5	233.9	0.90112		Gao 2017
Sandaowanzi	240W7-3-1	A_1	Quartz	L-V	I	-1.2	271.5	2.20061		Gao 2017
Sandaowanzi			Quartz		I	-0.9	278.9	1.63821		Gao 2017
Sandaowanzi			Quartz		I	-1.6	269.7	2.96343		Gao 2017
Sandaowanzi			Quartz		I	-1.4	277.6	2.58016		Gao 2017
Sandaowanzi			Quartz		I	-1.5	287.6	2.77133		Gao 2017
Sandaowanzi			Quartz		I	-1.2	279.6	2.20061		Gao 2017
Sandaowanzi			Quartz		I	-0.9	260.4	1.63821		Gao 2017
Sandaowanzi			Quartz		I	-1.5	275.6	2.77133		Gao 2017
Sandaowanzi			Quartz		I	-0.9	277.3	1.63821		Gao 2017
Sandaowanzi			Quartz		I	-1.3	277.3	2.38992		Gao 2017
Sandaowanzi			Quartz		I	-1.8	292.4	3.35046		Gao 2017
Sandaowanzi			Quartz		I	-1.5	282.3	2.77133		Gao 2017
Sandaowanzi	260-23-1	A_1	Quartz	L-V	II-IV	-0.9	242.7	1.63821		Gao 2017
Sandaowanzi			Quartz		II-IV	-1.2	259.1	2.20061		Gao 2017
Sandaowanzi			Quartz		II-IV	-1	266.6	1.82476		Gao 2017
Sandaowanzi			Quartz		II-IV	-2.3	270.8	4.3346		Gao 2017
Sandaowanzi			Quartz		II-IV	-1	272.4	1.82476		Gao 2017
Sandaowanzi			Quartz		II-IV	-0.9	278	1.63821		Gao 2017
Sandaowanzi			Quartz		II-IV	-2.3	244	4.3346		Gao 2017
Sandaowanzi			Quartz		II-IV	-2.5	249.6	4.73495		Gao 2017
Sandaowanzi			Quartz		II-IV	-3.8	251.1	7.43281		Gao 2017
Sandaowanzi			Quartz		II-IV	-2.6	260.3	4.93658		Gao 2017
Sandaowanzi			Quartz		II-IV	-0.6	264.5	1.08403		Gao 2017
Sandaowanzi			Quartz		II-IV	-1.2	271.8	2.20061		Gao 2017
Sandaowanzi			Quartz		II-IV	-1.6	285.7	2.96343		Gao 2017
Sandaowanzi			Quartz		II-IV	-1	243.5	1.82476		Gao 2017
Sandaowanzi			Quartz		II-IV	-3.3	248.8	6.37535		Gao 2017
Sandaowanzi			Quartz		II-IV	-0.7	250	1.26785		Gao 2017
Sandaowanzi			Quartz		II-IV	-0.4	265.5	0.719108		Gao 2017
Sandaowanzi			Quartz		II-IV	-1.9	274.2	3.54538		Gao 2017
Sandaowanzi			Quartz		II-IV	-0.7	275.8	1.26785		Gao 2017
Sandaowanzi			Quartz		II-IV	-2.2	280.1	4.13586		Gao 2017
Sandaowanzi			Quartz		II-IV	-1.8	284.7	3.35046		Gao 2017
Sandaowanzi	ZK15901-6	A_1	Quartz	L-V	V	-0.8	159.8	1.45257		Gao 2017
Sandaowanzi			Quartz		V	-0.5	172.8	0.90112		Gao 2017
Sandaowanzi			Quartz		V	-0.3	190.3	0.537993		Gao 2017
Sandaowanzi			Quartz		V	-0.2	157.2	0.357772		Gao 2017
Sandaowanzi			Quartz		V	-0.4	199.2	0.719108		Gao 2017
Sandaowanzi			Quartz		V	-0.3	157.3	0.537993		Gao 2017
Sandaowanzi			Quartz		V	-1.3	156.2	2.38992		Gao 2017
Sandaowanzi			Quartz		V	-2.2	152.3	4.13586		Gao 2017
Sandaowanzi			Quartz		V	-0.3	139.8	0.537993		Gao 2017
Sandaowanzi	ZK15901-14	A_1	Quartz	L-V	V	-0.2	168.2	0.357772		Gao 2017
Sandaowanzi			Quartz		V	-0.6	139.2	1.08403		Gao 2017
Sandaowanzi			Quartz		V	-0.7	154.8	1.26785		Gao 2017
Sandaowanzi			Quartz		V	-0.2	135.7	0.357772		Gao 2017
Sandaowanzi			Quartz		V	-0.3	175.1	0.537993		Gao 2017
Sandaowanzi			Quartz		V	-0.1	132.5	0.178443		Gao 2017
Sandaowanzi			Quartz		V	-0.6	135.7	1.08403		Gao 2017
Sandaowanzi			Quartz		V	-0.3	152.3	0.537993		Gao 2017
Sandaowanzi			Quartz		V	-0.4	143.2	0.719108		Gao 2017
Sandaowanzi			Quartz		V	-1.8	170.3	3.35046		Gao 2017
Sandaowanzi			Quartz		V	-0.2	167.1	0.357772		Gao 2017
Sandaowanzi			Quartz		V	-0.5	132.4	0.90112		Gao 2017
Sandaowanzi	ZK15901-18	A_1	Quartz	L-V	I	-1.4	256.3	2.58016		Gao 2017
Sandaowanzi			Quartz		I	-1	298.9	1.82476		Gao 2017
Sandaowanzi			Quartz		I	-0.6	282.4	1.08403		Gao 2017
Sandaowanzi			Quartz		I	-0.3	288.3	0.537993		Gao 2017
Sandaowanzi			Quartz		I	-0.4	270.5	0.719108		Gao 2017
Sandaowanzi			Quartz		I	-0.7	265.9	1.26785		Gao 2017
Sandaowanzi	ZK15903-7	A_1	Quartz	L-V	V	-0.8	150.3	1.45257		Gao 2017
Sandaowanzi			Quartz		V	-0.7	167.5	1.26785		Gao 2017
Sandaowanzi			Quartz		V	-0.8	168.1	1.45257		Gao 2017
Sandaowanzi			Quartz		V	-0.6	164.9	1.08403		Gao 2017
Sandaowanzi			Quartz		V	-1.2	187.1	2.20061		Gao 2017
Sandaowanzi			Quartz		V	-0.9	160.1	1.63821		Gao 2017
Sandaowanzi			Quartz		V	-2.6	199.9	4.93658		Gao 2017
Sandaowanzi			Quartz		V	-2.4	179.2	4.53429		Gao 2017
Sandaowanzi		A_1	Quartz	L-V	I	-2	262.4	3.74126		Gao 2017
Sandaowanzi			Quartz		I	-4	249.3	7.86285		Gao 2017
Sandaowanzi			Quartz		I	-1.7	238.2	3.15647		Gao 2017
Sandaowanzi			Quartz		I	-1.5	282.1	2.77133		Gao 2017
Sandaowanzi			Quartz		I	-0.8	271.6	1.45257		Gao 2017
Sandaowanzi			Quartz		I	-1.6	261.6	2.96343		Gao 2017
Sandaowanzi			Quartz		I	-0.6	283.9	1.08403		Gao 2017
Sandaowanzi			Quartz		I	-2.8	236.9	5.34276		Gao 2017
Sandaowanzi	ZK16901-8	A_1	Quartz	L-V	II-IV	-0.4	253.7	0.719108		Gao 2017
Sandaowanzi			Quartz		II-IV	-0.3	256.2	0.537993		Gao 2017
Sandaowanzi			Quartz		II-IV	-0.7	242.4	1.26785		Gao 2017
Sandaowanzi			Quartz		II-IV	-0.5	237.8	0.90112		Gao 2017
Sandaowanzi			Quartz		II-IV	-0.7	253.9	1.26785		Gao 2017
Sandaowanzi			Quartz		II-IV	-0.2	236.9	0.357772		Gao 2017
Sandaowanzi			Quartz		II-IV	-0.5	238.9	0.90112		Gao 2017
Sandaowanzi			Quartz		II-IV	-0.4	298.5	0.719108		Gao 2017
Sandaowanzi			Quartz		II-IV	-0.4	232.7	0.719108		Gao 2017
Sandaowanzi			Quartz		II-IV	-1.5	230.1	2.77133		Gao 2017
Sandaowanzi		A_2	Quartz	L-V	V	-0.8	135.1	1.45257		Gao 2017
Sandaowanzi			Quartz		V	-0.4	180.5	0.719108		Gao 2017
Sandaowanzi			Quartz		V	-0.4	159.9	0.719108		Gao 2017
Sandaowanzi			Quartz		V	-0.4	110.1	0.719108		Gao 2017
Sandaowanzi			Quartz		V	-0.3	172.1	0.537993		Gao 2017
Sandaowanzi			Quartz		V	-0.3	202.4	0.537993		Gao 2017
Sandaowanzi	ZK16901-9	A_1	Quartz	L-V	I	-0.6	274.2	1.08403		Gao 2017
Sandaowanzi			Quartz		I	-0.8	284.8	1.45257		Gao 2017
Sandaowanzi			Quartz		I	-0.5	285.8	0.90112		Gao 2017
Sandaowanzi			Quartz		I	-0.2	276	0.357772		Gao 2017
Sandaowanzi			Quartz		I	-0.7	287.1	1.26785		Gao 2017
Sandaowanzi			Quartz		I	-0.8	275.4	1.45257		Gao 2017
Sandaowanzi			Quartz		I	-0.5	286.9	0.90112		Gao 2017
Sandaowanzi			Quartz		I	-0.8	267.1	1.45257		Gao 2017
Sandaowanzi			Quartz		I	-0.4	288.6	0.719108		Gao 2017
Sandaowanzi			Quartz		I	-0.6	279.7	1.08403		Gao 2017
Sandaowanzi			Quartz		I	-0.8	285.8	1.45257		Gao 2017
Sandaowanzi	ZK16901-15	A_1	Quartz	L-V	V	-0.5	155.4	0.90112		Gao 2017
Sandaowanzi			Quartz		V	-0.6	149.7	1.08403		Gao 2017
Sandaowanzi			Quartz		V	-0.3	157.8	0.537993		Gao 2017
Sandaowanzi			Quartz		V	-0.5	138.7	0.90112		Gao 2017
Sandaowanzi			Quartz		V	-0.6	171.3	1.08403		Gao 2017
Sandaowanzi			Quartz		V	-0.5	167.6	0.90112		Gao 2017
Sandaowanzi			Quartz		V	-0.7	177.3	1.26785		Gao 2017
Sandaowanzi			Quartz		V	-0.6	181.7	1.08403		Gao 2017
Sandaowanzi		A_2	Quartz	L-V	II-IV	-0.6	200.3	1.08403		Gao 2017
Sandaowanzi			Quartz		II-IV	-0.8	191.1	1.45257		Gao 2017
Sandaowanzi			Quartz		II-IV	-0.3	205.9	0.537993		Gao 2017
Sandaowanzi			Quartz		II-IV	-0.5	215.7	0.90112		Gao 2017
Sandaowanzi			Quartz		II-IV	-0.6	204.2	1.08403		Gao 2017
Sandaowanzi			Quartz		II-IV	-0.8	203.5	1.45257		Gao 2017
Sandaowanzi			Quartz		II-IV	-0.7	190.5	1.26785		Gao 2017
Sandaowanzi			Quartz		II-IV	-4.7	220.3	9.40021		Gao 2017
Sandaowanzi	ZK18901-6	A_1	Quartz	L-V	II-IV	-1.5	262.1	2.77133		Gao 2017
Sandaowanzi			Quartz		II-IV	-0.7	235.2	1.26785		Gao 2017
Sandaowanzi			Quartz		II-IV	-0.3	225.1	0.537993		Gao 2017
Sandaowanzi			Quartz		II-IV	-0.7	237.6	1.26785		Gao 2017
Sandaowanzi			Quartz		II-IV	-0.5	235.2	0.90112		Gao 2017
Sandaowanzi			Quartz		II-IV	-0.6	263.7	1.08403		Gao 2017
Sandaowanzi			Quartz		II-IV	-0.8	245.7	1.45257		Gao 2017
Sandaowanzi			Quartz		II-IV	-0.1	252.8	0.178443		Gao 2017
Sandaowanzi			Quartz		II-IV	-0.3	266.1	0.537993		Gao 2017
Sandaowanzi			Quartz		II-IV	-0.5	266.9	0.90112		Gao 2017
Sandaowanzi			Quartz		II-IV	-0.7	234.4	1.26785		Gao 2017
Sandaowanzi			Quartz		II-IV	-0.8	239.2	1.45257		Gao 2017
Sandaowanzi			Quartz		II-IV	-0.3	229.5	0.537993		Gao 2017
Sandaowanzi			Quartz		II-IV	-0.6	231.2	1.08403		Gao 2017
Sandaowanzi			Quartz		II-IV	-0.2	238.7	0.357772		Gao 2017
Sandaowanzi			Quartz		II-IV	-0.1	233.8	0.178443		Gao 2017
Sandaowanzi			Quartz		II-IV	-0.7	235.2	1.26785		Gao 2017
Sandaowanzi			Quartz		II-IV	-0.5	276.2	0.90112		Gao 2017
Sandaowanzi	ZK20901-8	A_1	Quartz	L-V	I	-4.7	272.1	9.40021		Gao 2017
Sandaowanzi			Quartz		I	-2.1	279.2	3.93808		Gao 2017
Sandaowanzi			Quartz		I	-3.5	288.5	6.79533		Gao 2017
Sandaowanzi			Quartz		I	-1.7	256.8	3.15647		Gao 2017
Sandaowanzi			Quartz		I	-2	280.3	3.74126		Gao 2017
Sandaowanzi			Quartz		I	-0.9	288.9	1.63821		Gao 2017
Sandaowanzi			Quartz		I	-1.5	243.7	2.77133		Gao 2017
Sandaowanzi			Quartz		I	-4.5	289.3	8.95581		Gao 2017
Sandaowanzi			Quartz		I	-2.6	286.2	4.93658		Gao 2017
Sandaowanzi			Quartz		I	-0.8	283.8	1.45257		Gao 2017
Sandaowanzi	50CM25-3	A_1	Quartz	L-V	I	-2.7	273.5	5.13918		Gao 2017
Sandaowanzi			Quartz		I	-4.3	253.7	8.51554		Gao 2017
Sandaowanzi			Quartz		I	-2.6	275.3	4.93658		Gao 2017
Sandaowanzi			Quartz		I	-0.1	262.1	0.178443		Gao 2017
Sandaowanzi			Quartz		I	-3.6	299.1	7.00682		Gao 2017
Sandaowanzi			Quartz		I	-3.8	303.8	7.43281		Gao 2017
Sandaowanzi			Quartz		I	-4.6	247.3	9.17749		Gao 2017
Sandaowanzi			Quartz		I	-4.7	289.3	9.40021		Gao 2017
Sandaowanzi			Quartz		I	-3.4	299.3	6.58484		Gao 2017
Sandaowanzi			Quartz		I	-1.5	273.6	2.77133		Gao 2017
Sandaowanzi			Quartz		I	-0.7	286.5	1.26785		Gao 2017
Sandaowanzi	50CM33-7	A_1	Quartz	L-V	II-IV	-1.8	222.3	3.35046		Gao 2017
Sandaowanzi			Quartz		II-IV	-0.6	278.1	1.08403		Gao 2017
Sandaowanzi			Quartz		II-IV	-1.7	261.9	3.15647		Gao 2017
Sandaowanzi			Quartz		II-IV	-2.1	252.5	3.93808		Gao 2017
Sandaowanzi			Quartz		II-IV	-1.2	243.1	2.20061		Gao 2017
Sandaowanzi			Quartz		II-IV	-1.4	223.8	2.58016		Gao 2017
Sandaowanzi			Quartz		II-IV	-1.5	243.2	2.77133		Gao 2017
Sandaowanzi	90CM29-3	A_1	Quartz	L-V	II-IV	-2.3	267.3	4.3346		Gao 2017
Sandaowanzi			Quartz		II-IV	-0.1	293.6	0.178443		Gao 2017
Sandaowanzi			Quartz		II-IV	-2.4	267.3	4.53429		Gao 2017
Sandaowanzi			Quartz		II-IV	-3.1	299.3	5.95936		Gao 2017
Sandaowanzi			Quartz		II-IV	-3.7	275.4	7.21931		Gao 2017
Sandaowanzi			Quartz		II-IV	-0.5	308.7	0.90112		Gao 2017
Sandaowanzi			Quartz		II-IV	-0.6	257.4	1.08403		Gao 2017
Sandaowanzi			Quartz		II-IV	-0.4	264.8	0.719108		Gao 2017
Sandaowanzi			Quartz		II-IV	-2.6	243.1	4.93658		Gao 2017
Sandaowanzi			Quartz		II-IV	-1	263.7	1.82476		Gao 2017
Sandaowanzi			Quartz		II-IV	-0.5	257.6	0.90112		Gao 2017
Sandaowanzi			Quartz		II-IV	-1.7	238.6	3.15647		Gao 2017
Sandaowanzi			Quartz		II-IV	-4.1	254.3	8.07939		Gao 2017
Sandaowanzi	210CM11-76	A_1	Quartz	L-V	I	-1.7	303.2	3.15647		Gao 2017
Sandaowanzi			Quartz		I	-2.1	296.8	3.93808		Gao 2017
Sandaowanzi			Quartz		I	-1.1	286.3	2.01222		Gao 2017
Sandaowanzi			Quartz		I	-1.3	255.7	2.38992		Gao 2017
Sandaowanzi			Quartz		I	-0.7	315	1.26785		Gao 2017
Sandaowanzi			Quartz		I	-2.7	294.2	5.13918		Gao 2017
Sandaowanzi			Quartz		I	-0.1	278.1	0.178443		Gao 2017
Sandaowanzi			Quartz		I	-4.2	288.9	8.29696		Gao 2017
Sandaowanzi	130CM23-5	A_1	Quartz	L-V	V	-4.3	183.2	8.51554		Gao 2017
Sandaowanzi			Quartz		V	-4.2	191.3	8.29696		Gao 2017
Sandaowanzi	130CM25-2	A_1	Quartz	L-V	II-IV	-1.3	263.2	2.38992		Gao 2017
Sandaowanzi			Quartz		II-IV	-0.5	218.9	0.90112		Gao 2017
Sandaowanzi			Quartz		II-IV	-1.6	205.7	2.96343		Gao 2017
Sandaowanzi			Quartz		II-IV	-0.2	200.8	0.357772		Gao 2017
Sandaowanzi			Quartz		II-IV	-0.2	202.3	0.357772		Gao 2017
Sandaowanzi			Quartz		II-IV	-4.8	283.4	9.62397		Gao 2017
Sandaowanzi			Quartz		II-IV	-2	220.5	3.74126		Gao 2017
Sandaowanzi	240CM9-12	A_1	Quartz	L-V	I	-2	258.1	3.74126		Gao 2017
Sandaowanzi			Quartz		I	-2.8	272.9	5.34276		Gao 2017
Sandaowanzi			Quartz		I	-4.3	261.3	8.51554		Gao 2017
Sandaowanzi			Quartz		I	-2.7	259.1	5.13918		Gao 2017
Sandaowanzi			Quartz		I	-6.2	279.8	12.8678		Gao 2017
Sandaowanzi			Quartz		I	-4.4	265.4	8.73516		Gao 2017
Sandaowanzi			Quartz		I	-4.6	289.3	9.17749		Gao 2017
Sandaowanzi			Quartz		I	-3.3	225.7	6.37535		Gao 2017
Sandaowanzi			Quartz		I	-4.9	292.5	9.84877		Gao 2017
Sandaowanzi	240CM10-3	A_1	Quartz	L-V	V	-0.6	175.8	1.08403		Gao 2017
Sandaowanzi			Quartz		V	-0.8	192.3	1.45257		Gao 2017
Sandaowanzi			Quartz		V	-0.4	211.3	0.719108		Gao 2017
Sandaowanzi			Quartz		V	-0.9	182.3	1.63821		Gao 2017
Sandaowanzi			Quartz		V	-0.4	201.8	0.719108		Gao 2017
Sandaowanzi	ZK16401-7	A_1	Quartz	L-V	I	-3.5	278.3	6.79533		Gao 2017
Sandaowanzi			Quartz		I	-2.7	283.1	5.13918		Gao 2017
Sandaowanzi			Quartz		I	-1.6	285.4	2.96343		Gao 2017
Sandaowanzi			Quartz		I	-2.4	278.9	4.53429		Gao 2017
Sandaowanzi			Quartz		I	-1.5	283.9	2.77133		Gao 2017
Sandaowanzi			Quartz		I	-0.8	285.1	1.45257		Gao 2017
Sandaowanzi			Quartz		I	-0.7	286.3	1.26785		Gao 2017
Sandaowanzi			Quartz		I	-1.4	296.2	2.58016		Gao 2017
Sandaowanzi			Quartz		I	-1.7	293.4	3.15647		Gao 2017
Sandaowanzi			Quartz		I	-0.8	283.4	1.45257		Gao 2017
Sandaowanzi			Quartz		I	-0.6	287.1	1.08403		Gao 2017
Sandaowanzi			Quartz		I	-0.9	299.3	1.63821		Gao 2017
Sandaowanzi			Quartz		I	-0.3	300.1	0.537993		Gao 2017
Sandaowanzi			Quartz		I	-0.8	298.2	1.45257		Gao 2017
Sandaowanzi			Quartz		I	-0.1	300.9	0.178443		Gao 2017
Sandaowanzi	ZK19403-19	A_1	Quartz	L-V	I	-3.8	331.8	7.43281		Gao 2017
Sandaowanzi			Quartz		I	-3.4	327.3	6.58484		Gao 2017
Sandaowanzi			Quartz		I	-2.9	293.3	5.54731		Gao 2017
Sandaowanzi			Quartz		I	-4.1	282.7	8.07939		Gao 2017
Sandaowanzi			Quartz		I	-4.7	361.2	9.40021		Gao 2017
Sandaowanzi			Quartz		I	-4.9	298.3	9.84877		Gao 2017
Sandaowanzi	130CM23-14-7	A_3	Quartz	L-V	II-IV	-0.1	256.1	0.178443		Gao et al. 2021
Sandaowanzi			Quartz		II-IV	-0.1	255.2	0.178443		Gao et al. 2021
Sandaowanzi			Quartz		II-IV	-0.1	256.6	0.178443		Gao et al. 2021
Sandaowanzi			Quartz		II-IV	-0.1	255.8	0.178443		Gao et al. 2021
Sandaowanzi			Quartz		II-IV	-0.1	257.1	0.178443		Gao et al. 2021
Sandaowanzi			Quartz		II-IV	-0.1	257.2	0.178443		Gao et al. 2021
Sandaowanzi			Quartz		II-IV	-0.1	257.9	0.178443		Gao et al. 2021
Sandaowanzi		A_5	Quartz	L-V	II-IV	-0.3	267.1	0.537993		Gao et al. 2021
Sandaowanzi			Quartz		II-IV	-0.3	265.7	0.537993		Gao et al. 2021
Sandaowanzi			Quartz		II-IV	-0.3	266.3	0.537993		Gao et al. 2021
Sandaowanzi		A_4	Quartz	L-V	II-IV	-0.4	272.8	0.719108		Gao et al. 2021
Sandaowanzi			Quartz		II-IV	-0.4	278.8	0.719108		Gao et al. 2021
Sandaowanzi			Quartz		II-IV	-0.4	280.8	0.719108		Gao et al. 2021
Sandaowanzi		A_1	Quartz	L-V	II-IV	-0.3	248.6	0.537993		Gao et al. 2021
Sandaowanzi			Quartz		II-IV	-0.3	252.4	0.537993		Gao et al. 2021
Sandaowanzi			Quartz		II-IV	-0.5	203.2	0.90112		Gao et al. 2021
Sandaowanzi			Quartz		II-IV	-0.1	200.4	0.178443		Gao et al. 2021
Sandaowanzi		A_2	Quartz	L-V	II-IV	-0.2	248.5	0.357772		Gao et al. 2021
Sandaowanzi			Quartz		II-IV	-0.2	254.7	0.357772		Gao et al. 2021
Sandaowanzi			Quartz		II-IV	-0.2	249.6	0.357772		Gao et al. 2021
Sandaowanzi	130CM23-14-2	A_1	Quartz	L-V	II-IV	-0.4	244.8	0.719108		Gao et al. 2021
Sandaowanzi			Quartz		II-IV	-0.4	251.6	0.719108		Gao et al. 2021
Sandaowanzi		A_2	Quartz	L-V	II-IV	-0.4	273.4	0.719108		Gao et al. 2021
Sandaowanzi			Quartz		II-IV	-0.4	277.9	0.719108		Gao et al. 2021
Sandaowanzi			Quartz		II-IV	-0.4	277.4	0.719108		Gao et al. 2021
Sandaowanzi	130CM23-21	A_1	Quartz	L-V	Secondary	-0.1	167.3	0.178443		Gao et al. 2021
Sandaowanzi			Quartz		Secondary	-0.1	168.4	0.178443		Gao et al. 2021
Sandaowanzi		A_2	Quartz	L-V	Secondary	-0.3	216.4	0.537993		Gao et al. 2021
Sandaowanzi			Quartz		Secondary	-0.3	213.6	0.537993		Gao et al. 2021
Sandaowanzi		A_3	Quartz	L-V	Secondary	-0.4	187.5	0.719108		Gao et al. 2021
Sandaowanzi			Quartz		Secondary	-0.4	185.2	0.719108		Gao et al. 2021
Sandaowanzi		A_4	Quartz	L-V	I	-0.3	268.6	0.537993	0.064	Gao et al. 2021
Sandaowanzi			Quartz		I	-0.3	269.5	0.537993	0.064	Gao et al. 2021
Sandaowanzi			Quartz		I	-0.3	270.2	0.537993	0.064	Gao et al. 2021
Dong'an	DA-80	A_1	Quartz	L-V	II-IV	-0.3	237.2	0.537993		Gao et al. 2021
Dong'an			Quartz		II-IV	-0.3	255.7	0.537993		Gao et al. 2021
Dong'an			Quartz		II-IV	-0.3	240.8	0.537993		Gao et al. 2021
Dong'an			Quartz		II-IV	-0.3	248.9	0.537993		Gao et al. 2021
Dong'an			Quartz		II-IV	-0.3	244.2	0.537993		Gao et al. 2021
Dong'an		A_2	Quartz	L-V	II-IV	-0.1	242.1	0.178443		Gao et al. 2021
Dong'an			Quartz		II-IV	-0.1	245	0.178443		Gao et al. 2021
Dong'an			Quartz		II-IV	-0.1	243.2	0.178443		Gao et al. 2021
Dong'an	DA-53	A_1	Quartz	L-V	Secondary	-0.6	166.1	1.08403		Gao et al. 2021
Dong'an			Quartz		Secondary	-0.6	172.9	1.08403		Gao et al. 2021
Dong'an			Quartz		Secondary	-0.6	175.8	1.08403		Gao et al. 2021
Dong'an			Quartz		Secondary	-0.6	164.3	1.08403		Gao et al. 2021
Dong'an			Quartz		I	-0.1	269.5	0.178443		Gao et al. 2021
Dong'an			Quartz		I	-0.1	267.6	0.178443		Gao et al. 2021
Dong'an		A_2	Quartz	L-V	Secondary	-0.3	202.1	0.537993		Gao et al. 2021
Dong'an			Quartz		Secondary	-0.3	210.4	0.537993		Gao et al. 2021
Dong'an			Quartz		Secondary	-0.3	207.5	0.537993		Gao et al. 2021
Dong'an			Fluorite	L-V	V	-0.4	127.3	0.719108		Zhi 2015
Dong'an			Fluorite		V	-0.6	127.1	1.08403		Zhi 2015
Dong'an			Fluorite		V	-0.5	145.8	0.90112		Zhi 2015
Dong'an			Fluorite		V	-0.4	138.2	0.719108		Zhi 2015
Dong'an			Fluorite		V	-0.5	130.2	0.90112		Zhi 2015
Dong'an			Fluorite		V	-0.3	131.7	0.537993		Zhi 2015
Dong'an			Fluorite		V	-0.2	128.1	0.357772		Zhi 2015
Dong'an			Fluorite		V	-0.4	128.2	0.719108		Zhi 2015
Dong'an			Fluorite		V	-0.5	120.3	0.90112		Zhi 2015
Dong'an			Fluorite		V	-0.4	121.7	0.719108		Zhi 2015
Dong'an			Fluorite		V	-0.4	120.7	0.719108		Zhi 2015
Dong'an			Fluorite		V	-0.5	121.3	0.90112		Zhi 2015
Dong'an			Fluorite		V	-0.6	127.7	1.08403		Zhi 2015
Dong'an			Fluorite		V	-0.4	135.2	0.719108		Zhi 2015
Dong'an			Fluorite		V	-0.5	145.6	0.90112		Zhi 2015
Dong'an			Fluorite		V	-0.5	140.3	0.90112		Zhi 2015
Dong'an			Fluorite		V	-1.1	138.3	2.01222		Zhi 2015
Dong'an			Fluorite		V	-0.4	138.7	0.719108		Zhi 2015
Dong'an			Fluorite		V	-0.4	140.7	0.719108		Zhi 2015
Dong'an			Fluorite		V	-0.3	141.6	0.537993		Zhi 2015
Dong'an			Fluorite		V	-1	140.8	1.82476		Zhi 2015
Dong'an			Fluorite		V	-0.4	142.3	0.719108		Zhi 2015
Dong'an			Fluorite		V	-0.4	140.3	0.719108		Zhi 2015
Dong'an			Fluorite		V	-0.5	146.1	0.90112		Zhi 2015
Dong'an			Fluorite		V	-1	147.3	1.82476		Zhi 2015
Dong'an			Fluorite		V	-0.5	145.7	0.90112		Zhi 2015
Dong'an			Fluorite		V	-0.4	146.5	0.719108		Zhi 2015
Dong'an			Fluorite		V	-0.8	146.3	1.45257		Zhi 2015
Dong'an			Fluorite		V	-0.7	146.2	1.26785		Zhi 2015
Dong'an			Fluorite		V	-0.6	146.7	1.08403		Zhi 2015
Dong'an			Fluorite		V	-0.5	149.7	0.90112		Zhi 2015
Dong'an			Fluorite		V	-1	150.1	1.82476		Zhi 2015
Dong'an			Fluorite		V	-0.7	151.2	1.26785		Zhi 2015
Dong'an			Fluorite		V	-0.4	149.8	0.719108		Zhi 2015
Dong'an			Fluorite		V	-0.6	147.9	1.08403		Zhi 2015
Dong'an			Fluorite		V	-0.7	149.6	1.26785		Zhi 2015
Dong'an			Fluorite		V	-0.6	152.7	1.08403		Zhi 2015
Dong'an			Fluorite		V	-0.5	153.6	0.90112		Zhi 2015
Dong'an			Fluorite		V	-0.7	150.9	1.26785		Zhi 2015
Dong'an			Fluorite		V	-0.8	153.2	1.45257		Zhi 2015
Dong'an			Fluorite		V	-0.4	156.7	0.719108		Zhi 2015
Dong'an			Fluorite		V	-0.8	156.8	1.45257		Zhi 2015
Dong'an			Fluorite		V	-0.6	156.6	1.08403		Zhi 2015
Dong'an			Fluorite		V	-0.4	155.3	0.719108		Zhi 2015
Dong'an			Fluorite		V	-0.6	155.2	1.08403		Zhi 2015
Dong'an			Fluorite		V	-0.7	154.9	1.26785		Zhi 2015
Dong'an			Fluorite		V	-0.7	153.7	1.26785		Zhi 2015
Dong'an			Fluorite		V	-0.5	157.9	0.90112		Zhi 2015
Dong'an			Fluorite		V	-0.4	156.7	0.719108		Zhi 2015
Dong'an			Fluorite		V	-0.8	156.3	1.45257		Zhi 2015
Dong'an			Fluorite		V	-1	150.9	1.82476		Zhi 2015
Dong'an			Fluorite		V	-0.5	156.6	0.90112		Zhi 2015
Dong'an			Fluorite		V	-1.1	153	2.01222		Zhi 2015
Dong'an			Fluorite		V	-1.2	153.6	2.20061		Zhi 2015
Dong'an			Fluorite		V	-0.5	153.9	0.90112		Zhi 2015
Dong'an			Fluorite		V	-0.8	146.7	1.45257		Zhi 2015
Dong'an			Fluorite		V	-0.9	154.3	1.63821		Zhi 2015
Dong'an			Fluorite		V	-1	156.7	1.82476		Zhi 2015
Dong'an			Fluorite		V	-1.1	157.2	2.01222		Zhi 2015
Dong'an			Fluorite		V	-1.2	156.4	2.20061		Zhi 2015
Dong'an			Fluorite		V	-1.7	148.1	3.15647		Zhi 2015
Dong'an			Fluorite		V	-1.7	148.2	3.15647		Zhi 2015
Dong'an			Fluorite		V	-0.9	155.4	1.63821		Zhi 2015
Dong'an			Fluorite		V	-0.8	147.6	1.45257		Zhi 2015
Dong'an			Fluorite		V	-0.7	150.2	1.26785		Zhi 2015
Dong'an			Fluorite		V	-0.9	147.7	1.63821		Zhi 2015
Dong'an			Fluorite		V	-1.1	154.4	2.01222		Zhi 2015
Dong'an			Fluorite		V	-1.2	155.7	2.20061		Zhi 2015
Dong'an			Fluorite		V	-0.8	155.6	1.45257		Zhi 2015
Dong'an			Fluorite		V	-0.9	156.2	1.63821		Zhi 2015
Dong'an			Fluorite		V	-1	156.7	1.82476		Zhi 2015
Dong'an			Fluorite		V	-1.1	157.6	2.01222		Zhi 2015
Dong'an			Fluorite		V	-0.8	156.1	1.45257		Zhi 2015
Dong'an			Fluorite		V	-0.6	157.2	1.08403		Zhi 2015
Dong'an			Fluorite		V	-0.8	157.1	1.45257		Zhi 2015
References
1	Gao S (2017) Study on Mesozoic gold metallogenic system, northern Heihe, Heilongjiang province. PhD thesis, Beijing, China, China University of Geosciences (Beijing), pp 1-196 (in Chinese with English abstract).
2	Gao S, Hofstra AH, Zou X, Valley JW, Kitajima K, Marsh EE, Lowers HA, Adams DT, Qin K and Xu H (2021) Oxygen isotope evidence for input of magmatic fluids and precipitation of Au-Ag-tellurides in an otherwise ordinary adularia-sericite epithermal system in NE China. American Mineralogist 106: 2003-2019.
3	Zhi Y (2015) Study on the mineralization tectonic setting and genesis of the Dong’an gold deposit, Lesser Khingan Range. MSc thesis, Jilin University, Changchun, China, pp 1-82 (in Chinese with English abstract).

## Sheet: Table B2
American Mineralogist: October 2024 Online Materials AM-24-108552 (use tabs to navigate to other tables)
Gao et al.: The origin and evolution of Te in epithermal Au-Ag deposits
Table B2. Published Pb isotope data from igneous rocks, metamorphic rocks, and sulfide minerals in the North Heilongjiang Belt, NE China.
Period	Rock	Location	Sample no.	Age (Ma)	206Pb/204Pb	Err(%)	207Pb/204Pb	Err(%)	208Pb/204Pb	Err(%)	208Pb/206Pb	207Pb/206Pb	Reference
Cambrian	Marble	Cuihongshan	C-1		19.903		15.763		38.038		1.91117	0.791991	Han et al. 2004
Cambrian	Marble	Cuihongshan	C-2		19.278		15.694		37.92		1.96701	0.814089	Han et al. 2004
Cambrian	Marble	Cuihongshan	C-3		20.897		15.804		38.13		1.82466	0.756281	Han et al. 2004
Cambrian	Marble	Cuihongshan	C-4		20.642		15.916		38.767		1.87806	0.771049	Han et al. 2004
Cambrian	Slate	Cuihongshan	C-5		19.304		15.698		38.115		1.97446	0.813199	Han et al. 2004
Cambrian	Biotite granite	Cuihongshan	C-6		20.056		15.761		38.294		1.90935	0.78585	Han et al. 2004
Cambrian	Biotite granite	Cuihongshan	C-7		18.314		15.638		37.671		2.05695	0.853882	Han et al. 2004
Cambrian	Biotite granite	Cuihongshan	G-1		20.792		15.725		38.512		1.85225	0.756301	Han et al. 2004
Cambrian	Biotite granite	Cuihongshan	G-2		19.32		15.617		38.075		1.97076	0.808333	Han et al. 2004
Ordovician	Granite porphyry	Duobaoshan	1		17.996		15.568		37.707		2.0953	0.865081	Du 1988
Ordovician	Granite porphyry	Duobaoshan	2		17.63		15.485		37.415		2.12223	0.878332	Du 1988
Ordovician	Granite porphyry	Duobaoshan	3		17.56		15.434		37.3		2.12415	0.878929	Du 1988
Ordovician	Granite porphyry	Duobaoshan	4		17.59		15.46		37.35		2.12337	0.878908	Du 1988
Ordovician	Diorite	Zhengguang	6093	480	17.855		15.148		36.617		2.0508	0.84839	Zheng 2012
Ordovician	Andesitic tuff	Zhengguang	6094	480	17.635		15.484		37.36		2.11851	0.878027	Zheng 2012
Ordovician	Andesitic tuff	Zhengguang	6098	480	18.055		15.439		37.346		2.06846	0.855109	Zheng 2012
Ordovician	Andesitic tuff	Zhengguang	6099	480	18.392		15.586		37.697		2.04964	0.847434	Zheng 2012
Ordovician	Andesitic tuff	Zhengguang	6102	480	17.676		15.438		37.264		2.10817	0.873388	Zheng 2012
Carboniferous	Granite	Yongxin	17504-2	313	18.288		15.529		38.099		2.08328	0.849136	Li 2018
Permian	Syenogranite	Yongxin	15031	295	18.289		15.528		38.05		2.08049	0.849035	Li 2018
Triassic	Diorite	Mengdehe	12801-1	212	18.248		15.524		38.065		2.08598	0.850723	Li 2018
Triassic	Diorite	Mengdehe	14401-1	212	18.243		15.528		38.085		2.08765	0.851176	Li 2018
Triassic	Monzogranite	Cuihongshan	110723-1		18.48		15.551		38.118		2.06266	0.841504	Han et al. 2004
Triassic	Monzogranite	Cuihongshan	110723-5		18.291		15.554		37.73		2.06276	0.850364	Han et al. 2004
Triassic	Monzogranite	Cuihongshan	090817-11		17.39		15.506		37.23		2.14089	0.891662	Han et al. 2004
Triassic	Monzogranite	Cuihongshan	090817-12		18.804		15.578		38.216		2.03233	0.828441	Han et al. 2004
Triassic	Monzogranite	Cuihongshan	090817-13		18.9		15.597		38.398		2.03164	0.825238	Han et al. 2004
Triassic	Monzogranite	Cuihongshan	090817-14		18.978		15.587		38.427		2.02482	0.821319	Han et al. 2004
Triassic	Monzogranite	Cuihongshan	C-01		18.825		15.357		38.396		2.03963	0.815777	Zhang et al. 2014
Triassic	Monzogranite	Cuihongshan	C-02		18.747		15.583		38.312		2.04363	0.831226	Zhang et al. 2014
Triassic	Monzogranite	Cuihongshan	C-03		18.912		15.621		38.498		2.03564	0.825984	Zhang et al. 2014
Triassic	Monzogranite	Cuihongshan	C-04		18.907		15.61		38.367		2.02925	0.82562	Zhang et al. 2014
Triassic	Monzogranite	Cuihongshan	C-05		18.592		15.586		38.105		2.04954	0.838318	Zhang et al. 2014
Triassic	Monzogranite	Cuihongshan	C-06		18.609		15.547		38.032		2.04374	0.835456	Zhang et al. 2014
Triassic	Monzogranite	Cuihongshan	C-07		18.659		15.588		38.111		2.0425	0.835415	Zhang et al. 2014
Triassic	Monzogranite	Cuihongshan	C-08		18.575		15.616		38.17		2.05491	0.8407	Zhang et al. 2014
Jurassic	Monzogranite	Sandaowanzi	ZK239-3-601	177	18.632	0.009	15.561	0.012	38.592	0.013	2.07128	0.835176	Gao et al. 2017a
Jurassic	Monzogranite	Sandaowanzi	SDWZ-W4	177	18.917	0.015	15.584	0.007	38.719	0.009	2.04678	0.823809	Gao et al. 2017a
Jurassic	Monzogranite	Sandaowanzi	09sdwz-61	177	18.2729		15.5658		38.2882		2.09535	0.851852	Zhai ei al. 2018
Jurassic	Monzogranite	Sandaowanzi	09sdwz-62	177	18.8377		15.5863		38.6944		2.05409	0.827399	Zhai ei al. 2018
Jurassic	Granodiorite	Yongxin	18502-2	175	18.334		15.526		38.101		2.07816	0.846842	Li 2018
Jurassic	Granodiorite	Sankuanggou	SK45		18.878	0.0049	15.566	0.0063	38.417	0.007	2.03501	0.824558	Deng et al. 2018
Jurassic	Granodiorite	Sankuanggou	SK46		18.866	0.0051	15.566	0.0068	38.389	0.0073	2.03482	0.825082	Deng et al. 2018
Jurassic	Granodiorite	Sankuanggou	SK48		18.938	0.0046	15.612	0.0063	38.488	0.0066	2.03232	0.824374	Deng et al. 2018
Jurassic	Granodiorite	Sankuanggou	SK73		19.005	0.0081	15.582	0.0083	38.369	0.0084	2.01889	0.81989	Deng et al. 2018
Jurassic	Granodiorite	Sankuanggou	SK74		19.029	0.006	15.59	0.0069	38.464	0.0078	2.02134	0.819276	Deng et al. 2018
Jurassic	Granodiorite	Sankuanggou	SK75		18.842	0.0059	15.549	0.0086	38.246	0.0094	2.02983	0.825231	Deng et al. 2018
Jurassic	Granodiorite	Sankuanggou	SK76		18.954	0.0054	15.585	0.008	38.425	0.0072	2.02728	0.822254	Deng et al. 2018
Jurassic	Granodiorite	Sankuanggou	SK77		19.078	0.0104	15.595	0.0131	38.522	0.0143	2.01918	0.817434	Deng et al. 2018
Jurassic	Vocanic rock	Songliao basin	Rh126		18.089		15.529		38.039		2.10288	0.858478	Wang et al. 2006b
Jurassic	Vocanic rock	Songliao basin	Rh113		18.394		15.56		38.278		2.081	0.845928	Wang et al. 2006b
Jurassic	Vocanic rock	Songliao basin	Pe131		18.052		15.564		37.975		2.10365	0.862176	Wang et al. 2006b
Jurassic	Vocanic rock	Songliao basin	Da130		18.345		15.554		38.193		2.08193	0.84786	Wang et al. 2006b
Jurassic	Vocanic rock	Songliao basin	An122		18.35		15.546		38.22		2.08283	0.847193	Wang et al. 2006b
Jurassic	Vocanic rock	Songliao basin	An134		18.171		15.544		38.025		2.09262	0.855429	Wang et al. 2006b
Jurassic	Vocanic rock	Songliao basin	Bt131		18.118		15.563		38.033		2.09918	0.85898	Wang et al. 2006b
Jurassic	Vocanic rock	Songliao basin	Te126		17.963		15.576		37.961		2.11329	0.867116	Wang et al. 2006b
Cretaceous	Trachyandesite	Sandaowanzi	ZK259-5-268	122	18.331	0.013	15.629	0.009	38.246	0.008	2.08641	0.852599	Gao et al. 2017a
Cretaceous	Trachyandesite	Sandaowanzi	ZK17904-7	122	18.295	0.009	15.513	0.011	38.237	0.014	2.09002	0.847937	Gao et al. 2017a
Cretaceous	Trachyandesite	Sandaowanzi	09sdwz-55(2)	122	18.2138		15.6255		38.24		2.09951	0.857893	Zhai ei al. 2018
Cretaceous	Trachyandesite	Sandaowanzi	09sdwz-26(2)	122	18.3296		15.5487		38.2066		2.08442	0.848284	Zhai ei al. 2018
Cretaceous	Trachyandesite	Sandaowanzi	09sdwz-38(2)	122	18.2093		15.6188		38.2277		2.09935	0.857738	Zhai ei al. 2018
Cretaceous	Dacite	Beidagou	BDGZK1902-5	122	18.336	0.007	15.614	0.012	38.251	0.009	2.08611	0.851549	Gao et al. 2017a
Cretaceous	Dacite	Beidagou	BDGZK24001-190	122	18.345	0.01	15.527	0.008	38.246	0.008	2.08482	0.846389	Gao et al. 2017a
Cretaceous	Granodiorite	Beidagou	BDGZK24001-670	122	18.321	0.008	15.495	0.009	38.238	0.011	2.08711	0.845751	Gao et al. 2017a
Cretaceous	Granodiorite	Beidagou	BDGZK24001-310	122	18.326	0.009	15.509	0.008	38.243	0.014	2.08682	0.846284	Gao et al. 2017a
Cretaceous	Granodiorite	Beidagou	BDGZK24001-430	122	18.284	0.009	15.484	0.013	38.231	0.009	2.09095	0.846861	Gao et al. 2017a
Cretaceous	Granodioritic porphyry	Tuanjiegou	TJG-1	108	18.383	0.002	15.52	0.001	38.238	0.004	2.08007	0.844258	Wang et al. 2016
Cretaceous	Granodioritic porphyry	Tuanjiegou	TJG-2	108	18.395	0.002	15.523	0.002	38.251	0.004	2.07942	0.843871	Wang et al. 2016
Cretaceous	Granodioritic porphyry	Tuanjiegou	TJG-3	108	18.378	0.002	15.52	0.002	38.226	0.004	2.07999	0.844488	Wang et al. 2016
Cretaceous	Granodioritic porphyry	Tuanjiegou	TJG-4	108	18.378	0.002	15.518	0.002	38.213	0.004	2.07928	0.844379	Wang et al. 2016
Cretaceous	Granodioritic porphyry	Tuanjiegou	TJG-5	108	18.341	0.002	15.507	0.001	38.174	0.004	2.08135	0.845483	Wang et al. 2016
Cretaceous	Granodioritic porphyry	Tuanjiegou	TJG-6	108	18.367	0.001	15.517	0.001	38.218	0.003	2.0808	0.84483	Wang et al. 2016
Cretaceous	Diorite	Yongxin	17001-2	115	18.288		15.525		38.11		2.08388	0.848917	Li 2018
Cretaceous	Diorite	Yongxin	18007-4	110	18.288		15.596		38.306		2.0946	0.8528	Li 2018
Cretaceous	Diorite	Yongxin	18007-4-1	110	18.293		15.525		38.139		2.0849	0.848685	Li 2018
Cretaceous	Granite porphyry	Yongxin	14021	115	18.271		15.533		38.125		2.08664	0.850145	Li 2018
Cretaceous	Andesite	Yongxin	18022	114	18.358		15.538		38.259		2.08405	0.846388	Li 2018
Cretaceous	Andesite	Yongxin	YXKL	114	18.52		15.529		38.157		2.06031	0.838499	Li 2018
Cretaceous	Tuff	Yongxin	21505	115	18.293		15.516		38.159		2.08599	0.848193	Li 2018
Cretaceous	Diorite	Keluo	K121B03	104	18.275		15.523		38.084		2.08394	0.849412	Li 2018
Cretaceous	Vocanic rock	Songliao basin	Rh155		18.457		15.541		38.287		2.07439	0.842011	Wang et al. 2006b
Cretaceous	Vocanic rock	Songliao basin	Tr146		17.888		15.558		37.866		2.11684	0.869745	Wang et al. 2006b
Cretaceous	Vocanic rock	Songliao basin	Ta147		17.849		15.569		37.846		2.12034	0.872262	Wang et al. 2006b
Cretaceous	Vocanic rock	Songliao basin	An157		17.679		15.576		37.754		2.13553	0.881045	Wang et al. 2006b
Cretaceous	Vocanic rock	Songliao basin	An156		18.387		15.552		38.187		2.07685	0.845815	Wang et al. 2006b
Cretaceous	Vocanic rock	Songliao basin	An153		18.437		15.555		38.257		2.07501	0.843684	Wang et al. 2006b
Cretaceous	Vocanic rock	Songliao basin	Bt155		18.076		15.567		38.005		2.10251	0.861197	Wang et al. 2006b
Cretaceous	Vocanic rock	Songliao basin	Ms257		18.758		15.577		38.743		2.06541	0.830419	Wang et al. 2006b
Cretaceous	Vocanic rock	Songliao basin	An249		18.417		15.552		38.27		2.07797	0.844437	Wang et al. 2006b
Cretaceous	Andesite	Gaosongshan	GSS3-1		17.986		15.589		38.709		2.15217	0.86673	Zhang et al. 2019
Cretaceous	Pyroxene andesite	Gaosongshan	FQ3-4		18.235		15.695		39.643		2.17401	0.860707	Zhang et al. 2019
Cretaceous	Andesite	Gaosongshan	GSS15-3		18.588		15.613		38.559		2.0744	0.839951	Zhang et al. 2019
Cretaceous	Andesite	Gaosongshan	FG15-1		18.737		15.609		38.473		2.05332	0.833058	Zhang et al. 2019
Cretaceous	Rhyolite	Gaosongshan	GSS7-1		18.657		15.703		38.538		2.06561	0.841668	Zhang et al. 2019
Cretaceous	Granite porphyry	Gaosongshan	GSS17-1		18.366		15.555		38.374		2.0894	0.846945	Zhang et al. 2019
Cretaceous	Granite porphyry	Gaosongshan	GSS17-2		18.505		15.646		38.879		2.101	0.845501	Zhang et al. 2019
Cretaceous	Granite porphyry	Gaosongshan	GSS17-3		18.449		15.601		38.653		2.09513	0.845628	Zhang et al. 2019
Cretaceous	Granite porphyry	Gaosongshan	GSS17-4		18.374		15.547		38.337		2.08648	0.846141	Zhang et al. 2019
Cretaceous	Granite porphyry	Gaosongshan	GSS17-5		18.388		15.556		38.375		2.08696	0.845987	Zhang et al. 2019
Cretaceous	Granite porphyry	Gaosongshan	GSS15-2		18.474		15.628		38.65		2.09213	0.845946	Zhang et al. 2019
Cretaceous	Andesite	Gaosongshan	Zr-1		18.708		15.552		38.495		2.05768	0.831302	Zheng et al. 2013
Cretaceous	Andesite	Gaosongshan	Zr-2		18.522		15.537		38.25		2.06511	0.83884	Zheng et al. 2013
Cenozoic	Basalt	Wudalianchi	WDLC01		17.0484	0.011	15.4348	0.011	37.1371	0.03	2.17833	0.905352	Wang et al. 2017
Cenozoic	Basalt	Wudalianchi	WDLC02		16.9436	0.007	15.4499	0.009	36.97	0.024	2.18194	0.911843	Wang et al. 2017
Cenozoic	Basalt	Wudalianchi	WDLC03		17.0416	0.006	15.4396	0.008	37.1053	0.024	2.17734	0.905995	Wang et al. 2017
Cenozoic	Basalt	Wudalianchi	WDLC05		16.9261	0.009	15.4404	0.01	36.9559	0.028	2.18337	0.912224	Wang et al. 2017
Cenozoic	Basalt	Wudalianchi	WDLC06		17.0092	0.006	15.4431	0.007	37.0857	0.021	2.18033	0.907926	Wang et al. 2017
Cenozoic	Basalt	Wudalianchi	WDLC07		17.1031	0.007	15.4358	0.007	37.0998	0.022	2.16919	0.902515	Wang et al. 2017
Cenozoic	Basalt	Wudalianchi	WDLC08		16.8348	0.008	15.4349	0.007	36.7861	0.018	2.18512	0.916845	Wang et al. 2017
Cenozoic	Basalt	Wudalianchi	WDLC13		16.8527	0.011	15.4437	0.009	36.8019	0.021	2.18374	0.916393	Wang et al. 2017
Cenozoic	Basalt	Wudalianchi	82H-2		16.723		15.382		36.542		2.18513	0.919811	Basu et al. 1991
Cenozoic	Basalt	Wudalianchi	82H-4		16.874		15.407		36.761		2.17856	0.913062	Basu et al. 1991
Cenozoic	Basalt	Wudalianchi	82H-6		16.996		15.382		36.948		2.17392	0.905036	Basu et al. 1991
Cenozoic	Basalt	Wudalianchi	W1-32		16.966		15.399		36.811		2.16969	0.907639	Zhang et al. 1995
Cenozoic	Basalt	Wudalianchi	A-4		16.9		15.447		36.89		2.18284	0.914024	Zhang et al. 1995
Cenozoic	Basalt	Wudalianchi	L-13		16.805		15.428		36.759		2.18738	0.91806	Zhang et al. 1995
Cenozoic	Basalt	Wudalianchi	H-38		17.058		15.436		37.189		2.18015	0.904913	Zhang et al. 1995
Cenozoic	Basalt	Wudalianchi	LS3-1		16.83		15.437		36.775		2.18509	0.917231	Zou et al. 2003
Cenozoic	Basalt	Wudalianchi	LE6-4		17.009		15.445		37.06		2.17885	0.908049	Zou et al. 2003
Cenozoic	Basalt	Wudalianchi	LHK-1		16.968		15.44		37		2.18058	0.909948	Zou et al. 2003
Cenozoic	Basalt	Wudalianchi	LW5-2		16.988		15.47		37.002		2.17813	0.910643	Zou et al. 2003
Cenozoic	Basalt	Wudalianchi	HL9720		16.858		15.449		36.846		2.18567	0.91642	Zou et al. 2003
Cenozoic	Basalt	Wudalianchi	NDW2-2b		16.907		15.475		36.953		2.18566	0.915301	Zou et al. 2003
Cenozoic	Basalt	Wudalianchi	HK-2		17.047		15.431		37.13		2.1781	0.905203	Zou et al. 2003
Cenozoic	Basalt	Wudalianchi	HS2-2		17.108		15.461		37.286		2.17945	0.903729	Zou et al. 2003
Cenozoic	Basalt	Wudalianchi	HN6-1		17.045		15.482		37.216		2.1834	0.908302	Zou et al. 2003
Cenozoic	Basalt	Wudalianchi	H-07-1		17.144		15.456		37.217		2.17085	0.90154	Rasskazov et al. 2011
Cenozoic	Basalt	Wudalianchi	H-07-8		17.162		15.437		37.191		2.16706	0.899487	Rasskazov et al. 2011
Cenozoic	Basalt	Wudalianchi	H-07-10		17.254		15.444		37.228		2.15764	0.895097	Rasskazov et al. 2011
Cenozoic	Basalt	Wudalianchi	H-07-13		17.117		15.437		37.17		2.17153	0.901852	Rasskazov et al. 2011
Cenozoic	Basalt	Wudalianchi	H-07-18		17.024		15.452		37.104		2.17951	0.90766	Rasskazov et al. 2011
Cenozoic	Basalt	Wudalianchi	H-07-20		17.224		15.457		37.312		2.16628	0.897411	Rasskazov et al. 2011
Cenozoic	Basalt	Keluo	DZ-4		17.008		15.41		37.04		2.1778	0.906044	Zhang et al. 1995
Cenozoic	Basalt	Keluo	DZ-3		17.046		15.411		37.204		2.18256	0.904083	Zhang et al. 1995
Cenozoic	Basalt	Keluo	MH-1		16.607		15.352		37.151		2.23707	0.924429	Zhang et al. 1995
Cenozoic	Basalt	Keluo	G-1a		16.721		15.418		36.628		2.19054	0.922074	Zhang et al. 1995
Cenozoic	Basalt	Keluo	ST-M		16.842		15.382		36.511		2.16785	0.913312	Zhang et al. 1995
Cenozoic	Basalt	Keluo	CH-07-14		17.122		15.457		37.176		2.17124	0.902757	Rasskazov et al. 2011
Cenozoic	Basalt	Keluo	CH-07-15A		16.954		15.424		37.011		2.18302	0.909756	Rasskazov et al. 2011
Cenozoic	Basalt	Keluo	CH-07-16		16.974		15.439		37.051		2.18281	0.909568	Rasskazov et al. 2011
Cenozoic	Basalt	Keluo	CH-07-17		16.953		15.476		37.024		2.18392	0.912877	Rasskazov et al. 2011
Cenozoic	Basalt	Keluo	CH-07-19		16.866		15.445		36.9		2.18783	0.915748	Rasskazov et al. 2011
Cenozoic	Basalt	Keluo	CH-07-20		16.89		15.434		36.875		2.18324	0.913795	Rasskazov et al. 2011
Cenozoic	Basalt	Keluo	CH-07-21		17.017		15.45		37.098		2.18006	0.907916	Rasskazov et al. 2011
Cenozoic	Basalt	Erkeshan	ER-8		16.841		15.376		36.67		2.17742	0.91301	Zhang et al. 1995
Cenozoic	Basalt	Erkeshan	RB-53		16.789		15.397		36.776		2.19048	0.917089	Zhang et al. 1995
Period	Mineral	Location	Sample no.	Age (Ma)	206Pb/204Pb	Err(%)	207Pb/204Pb	Err(%)	208Pb/204Pb	Err(%)	208Pb/206Pb	207Pb/206Pb	Reference
Cambrian	Pyrrhotite	Yangbishan	YB‐8	520	18.863		15.599		38.345		2.03282	0.826963	Ma et al. 2018
Cambrian	Pyrrhotite	Yangbishan	YB‐11‐2	520	18.586		15.603		38.544		2.07382	0.839503	Ma et al. 2018
Cambrian	Pyrrhotite	Yangbishan	Y1‐6	520	18.305		15.572		38.244		2.08927	0.850697	Ma et al. 2018
Cambrian	Pyrrhotite	Yangbishan	YB‐11‐1	520	18.205		15.559		38.443		2.11167	0.854655	Ma et al. 2018
Cambrian	Pyrrhotite	Yangbishan	Y1‐4	520	17.939		15.548		38.202		2.12955	0.866715	Ma et al. 2018
Cambrian	Pyrrhotite	Yangbishan	YB‐2	520	17.879		15.537		38.404		2.14799	0.869008	Ma et al. 2018
Cambrian	Pyrite	Yangbishan	Y1‐6‐1	520	18.059		15.552		38.187		2.11457	0.861177	Ma et al. 2018
Cambrian	Pyrite	Yangbishan	YB‐8‐1	520	22.9		15.834		38.416		1.67755	0.691441	Ma et al. 2018
Cambrian	Pyrite	Yangbishan	YBS‐1	520	19.574		15.655		38.742		1.97926	0.799785	Hao et al. 2020
Cambrian	Pyrite	Yangbishan	YBS‐2	520	18.664		15.593		38.107		2.04174	0.835459	Hao et al. 2020
Cambrian	Pyrite	Yangbishan	YBS‐3	520	19.306		15.613		38.178		1.97752	0.808712	Hao et al. 2020
Cambrian	Pyrite	Yangbishan	YBS‐4	520	20.242		15.677		39.194		1.93627	0.774479	Hao et al. 2020
Cambrian	Pyrite	Yangbishan	YBS‐5	520	20.864		15.72		39.125		1.87524	0.753451	Hao et al. 2020
Cambrian	Pyrite	Yangbishan	YBS‐7‐1		19.039		15.648		38.368		2.01523	0.821892	Hao et al. 2020
Cambrian	Pyrite	Yangbishan	YBS‐7‐2		19.221		15.646		38.213		1.98809	0.814006	Hao et al. 2020
Cambrian	Pyrite	Yangbishan	YBS‐7‐3		19.716		15.656		38.915		1.97378	0.794076	Hao et al. 2020
Cambrian	Pyrite	Yangbishan	YBS‐5‐1		18.753		15.613		39.077		2.08377	0.83256	Hao et al. 2020
Ordovician	Pyrite	Duobaoshan	HD4-3		17.201	0.003	15.46	0.003	37.546	0.007	2.18278	0.898785	Liu et al. 2017
Ordovician	Chalcopyrite	Duobaoshan	HD4-9		17.941	0.005	15.454	0.004	37.243	0.009	2.07586	0.861379	Liu et al. 2017
Ordovician	Chalcopyrite	Duobaoshan	HD4-10		17.896	0.002	15.455	0.002	37.319	0.005	2.08533	0.863601	Liu et al. 2017
Ordovician	Pyrite	Duobaoshan	HD4-11		17.887	0.003	15.483	0.002	36.947	0.005	2.06558	0.865601	Liu et al. 2017
Ordovician	Chalcopyrite	Duobaoshan	HD4-12		17.906	0.001	15.461	0.001	37.34	0.002	2.08533	0.863454	Liu et al. 2017
Ordovician	Pyrite	Duobaoshan	HD4-12-1		17.859	0.003	15.448	0.003	37.331	0.006	2.09032	0.864998	Liu et al. 2017
Ordovician	Chalcopyrite	Duobaoshan	HD4-14		18.037	0.002	15.5	0.005	37.52	0.013	2.08017	0.859345	Liu et al. 2017
Ordovician	Pyrite	Duobaoshan	HD4-14-1		17.985	0.002	15.475	0.001	37.431	0.003	2.08123	0.860439	Liu et al. 2017
Ordovician	Pyrite	Duobaoshan	HD4-15-1		17.695	0.001	15.445	0.001	37.265	0.003	2.10596	0.872845	Liu et al. 2017
Ordovician	Pyrite	Duobaoshan	HD4-15		17.84	0.005	15.496	0.004	37.449	0.01	2.09916	0.86861	Liu et al. 2017
Ordovician	Chalcopyrite	Duobaoshan	HD4-16		18.129	0.003	15.507	0.002	37.734	0.005	2.08142	0.85537	Liu et al. 2017
Ordovician	Pyrite	Tongshan	HT-3		18.067	0.003	15.551	0.002	37.999	0.005	2.10323	0.860741	Liu et al. 2017
Ordovician	Pyrite	Tongshan	HT-9		18.34	0.004	15.513	0.003	37.682	0.008	2.05463	0.845856	Liu et al. 2017
Ordovician	Pyrite	Tongshan	HT-10		18.453	0.005	15.525	0.004	37.638	0.01	2.03967	0.841327	Liu et al. 2017
Ordovician	Pyrite	Tongshan	HT-18		17.951	0.002	15.521	0.001	37.866	0.003	2.10941	0.864631	Liu et al. 2017
Ordovician	Pyrite	Tongshan	HT-19		17.591	0.002	15.449	0.002	37.28	0.005	2.11927	0.878233	Liu et al. 2017
Ordovician	Pyrite	Tongshan	HT-19-1		17.691	0.004	15.485	0.003	37.5	0.008	2.11972	0.875304	Liu et al. 2017
Ordovician	Chalcopyrite	Tongshan	TS-041	480	17.682		15.48		37.402		2.11526	0.875467	Hu 2015
Ordovician	Pyrite	Tongshan	TS-042	480	17.725		15.471		37.395		2.10973	0.872835	Hu 2015
Ordovician	Pyrite	Tongshan	TS-043	480	17.71		15.479		37.425		2.11321	0.874026	Hu 2015
Ordovician	Pyrite	Tongshan	TS-5	480	17.703		15.475		37.409		2.11314	0.874146	Hu 2015
Ordovician	Pyrite	Tongshan	TS-7	480	17.798		15.495		37.52		2.1081	0.870603	Hu 2015
Ordovician	Pyrite	Zhengguang	ZG-66	480	17.573		15.432		37.231		2.11865	0.878165	Gao et al. 2017c
Ordovician	Pyrite	Zhengguang	ZG-68	480	17.572		15.424		37.206		2.11735	0.87776	Gao et al. 2017c
Ordovician	Pyrite	Zhengguang	ZK4607-13	480	17.614		15.433		37.247		2.11462	0.876178	Gao et al. 2017c
Ordovician	Pyrite	Zhengguang	ZK5807-7	480	17.629		15.486		37.418		2.12253	0.878439	Gao et al. 2017c
Ordovician	Pyrite	Zhengguang	ZG-70	480	17.614		15.471		37.36		2.12104	0.878335	Gao et al. 2017c
Triassic	Ganela	Cuihongshan	CZ-25		18.674	0.002	15.584	0.005	38.177	0.005	2.04439	0.834529	Chen et al. 2017
Triassic	Pyrrhotite	Cuihongshan	CZ-49		18.694	0.002	15.606	0.001	38.249	0.003	2.04606	0.834813	Chen et al. 2017
Triassic	Ganela	Cuihongshan	CZ-73		18.65	0.002	15.586	0.001	38.183	0.003	2.04735	0.83571	Chen et al. 2017
Triassic	Sphalerite	Cuihongshan	CZ-73		18.697	0.002	15.638	0.002	38.359	0.005	2.05161	0.836391	Chen et al. 2017
Triassic	Sphalerite	Cuihongshan	CZ-74		18.733	0.002	15.663	0.002	38.449	0.004	2.05247	0.836118	Chen et al. 2017
Triassic	Pyrite	Cuihongshan	CZ-81		19.058	0.003	15.602	0.002	38.195	0.006	2.00415	0.818659	Chen et al. 2017
Triassic	Pyrrhotite	Cuihongshan	CZ-89		18.806	0.003	15.727	0.002	38.65	0.006	2.0552	0.836276	Chen et al. 2017
Triassic	Ganela	Cuihongshan	CZ-103b		18.729	0.002	15.653	0.002	38.406	0.006	2.05062	0.835763	Chen et al. 2017
Triassic	Pyrite	Gaogangshan	ZK11401-20		18.794		15.589		38.426		2.04459	0.829467	Zhang et al. 2017
Triassic	Pyrite	Gaogangshan	ZK11401-23		19.022		15.618		38.532		2.02565	0.821049	Zhang et al. 2017
Triassic	Pyrite	Gaogangshan	ZK11401-25		18.739		15.602		38.401		2.04926	0.832595	Zhang et al. 2017
Triassic	Pyrite	Gaogangshan	ZK11401-28		18.733		15.587		38.433		2.05162	0.832061	Zhang et al. 2017
Triassic	Pyrite	Gaogangshan	ZK11201-B34-1		19.37		15.622		38.571		1.99128	0.806505	Zhang et al. 2017
Triassic	Pyrite	Mengdehe	I72zk1501	210	18.144		15.551		37.977		2.09309	0.857088	Li 2018
Triassic	Pyrite	Mengdehe	I56zk1501	210	18.435		15.598		38.191		2.07166	0.846108	Li 2018
Triassic	Pyrite	Mengdehe	I128zk1501	210	18.257		15.573		38.149		2.08955	0.852988	Li 2018
Triassic	Pyrite	Mengdehe	I152zk1502	210	18.27		15.568		38.17		2.08922	0.852107	Li 2018
Triassic	Pyrite	Mengdehe	I120zk1501	210	18.223		15.557		38.101		2.09082	0.853701	Li 2018
Triassic	Pyrite	Mengdehe	I00zk1403	210	18.855		15.543		38.046		2.01782	0.824344	Li 2018
Triassic	Pyrite	Mengdehe	I152zk1501	210	18.227		15.542		38.056		2.08789	0.852691	Li 2018
Jurassic	Stibnite	Daxintun	DXT-001	154	18.306	0.008	15.561	0.01	38.227	0.009	2.08822	0.850049	Gao et al. 2018
Jurassic	Stibnite	Daxintun	DXT-1	154	18.257	0.01	15.543	0.009	38.154	0.009	2.08983	0.851345	Gao et al. 2018
Jurassic	Stibnite	Daxintun	DXT10TC30-1	154	18.263	0.006	15.552	0.008	38.172	0.009	2.09013	0.851558	Gao et al. 2018
Jurassic	Stibnite	Daxintun	DXTZK2001-5	154	18.271	0.008	15.558	0.009	38.216	0.011	2.09162	0.851513	Gao et al. 2018
Jurassic	Stibnite	Daxintun	DXTZK1001-96	154	18.234	0.009	15.537	0.01	38.103	0.009	2.08967	0.85209	Gao et al. 2018
Jurassic	Chalcopyrite	Sankuanggou	YmII-1		18.378	0.004	15.599	0.003	38.333	0.008	2.08581	0.848787	Li 2011
Jurassic	Chalcopyrite	Sankuanggou	ZK0-1-5		18.786	0.001	15.578	0.001	37.765	0.002	2.01027	0.829235	Li 2011
Jurassic	Chalcopyrite	Sankuanggou	ZK101-1-4		18.368	0.002	15.603	0.002	38.403	0.004	2.09076	0.849466	Li 2011
Jurassic	Chalcopyrite	Sankuanggou	ZK1020-4-5		19.188	0.002	15.571	0.001	37.892	0.003	1.97478	0.811497	Li 2011
Jurassic	Chalcopyrite	Sankuanggou	ZK1020-4-7		18.253	0.003	15.606	0.004	38.131	0.009	2.08903	0.854983	Li 2011
Jurassic	Chalcopyrite	Sankuanggou	ZK103-6		18.407	0.002	15.555	0.002	38.045	0.005	2.06688	0.845059	Li 2011
Jurassic	Chalcopyrite	Sankuanggou	ZK104-4		18.263	0.002	15.535	0.002	37.956	0.004	2.0783	0.850627	Li 2011
Jurassic	Chalcopyrite	Sankuanggou	ZK2-2-7		18.3	0.001	15.597	0.001	38.258	0.003	2.0906	0.852295	Li 2011
Jurassic	Chalcopyrite	Sankuanggou	ZK2-2-8		18.203	0.002	15.512	0.002	37.828	0.004	2.07812	0.852167	Li 2011
Jurassic	Molybdenite	Sankuanggou	ZK0-1-5		18.363	0.001	15.521	0.001	37.839	0.002	2.06061	0.845232	Li 2011
Jurassic	Pyrite	Sankuanggou	ZK101-1-4		18.363	0.002	15.596	0.002	38.329	0.005	2.0873	0.849317	Li 2011
Jurassic	Bornite	Sankuanggou	ZK2-2-7		18.197	0.002	15.519	0.002	37.847	0.004	2.07985	0.852833	Li 2011
Jurassic	Magnenite	Sankuanggou			18.115		15.599		38.172		2.1072	0.86111	Li 2011
Jurassic	Tonalite	Sankuanggou			18.321		15.581		38.303		2.09066	0.850445	Li 2011
Cretaceous	Pyrite	Beidagou	BDGZK12001-128	122	18.269	0.01	15.557	0.013	38.216	0.011	2.09185	0.851552	Gao et al. 2017a
Cretaceous	Pyrite	Beidagou	BDGZK12001-13	122	18.257	0.007	15.548	0.015	38.204	0.009	2.09257	0.851619	Gao et al. 2017a
Cretaceous	Pyrite	Sandaowanzi	09sdwz-26	122	18.237		15.54		38.09		2.08861	0.852114	Zhai ei al. 2018
Cretaceous	Pyrite	Sandaowanzi	09sdwz-32	122	18.315		15.562		38.229		2.08731	0.849686	Zhai ei al. 2018
Cretaceous	Pyrite	Sandaowanzi	09sdwz-38	122	18.312		15.557		38.192		2.08563	0.849552	Zhai ei al. 2018
Cretaceous	Pyrite	Sandaowanzi	09sdwz-39	122	18.243		15.541		38.098		2.08836	0.851888	Zhai ei al. 2018
Cretaceous	Pyrite	Sandaowanzi	09sdwz-50	122	18.278		15.547		38.15		2.08721	0.850585	Zhai ei al. 2018
Cretaceous	Pyrite	Sandaowanzi	09sdwz-55	122	18.273		15.555		38.186		2.08975	0.851256	Zhai ei al. 2018
Cretaceous	Pyrite	Tuanjiegou	W-1	108	18.286	0.004	15.6	0.003	38.273	0.008	2.09302	0.853112	Wang et al. 2016
Cretaceous	Pyrite	Tuanjiegou	W-2	108	18.37	0.004	15.572	0.003	38.172	0.008	2.07795	0.847686	Wang et al. 2016
Cretaceous	Pyrite	Tuanjiegou	W-5	108	18.173	0.002	15.587	0.002	38.328	0.005	2.10906	0.857701	Wang et al. 2016
Cretaceous	Pyrite	Tuanjiegou	W-6	108	18.288	0.002	15.582	0.002	38.339	0.004	2.0964	0.852034	Wang et al. 2016
Cretaceous	Pyrite	Tuanjiegou	W-7	108	18.329	0.004	15.536	0.003	38.219	0.008	2.08517	0.847619	Wang et al. 2016
Cretaceous	Pyrite	Tuanjiegou	W-8	108	18.358	0.002	15.582	0.002	38.311	0.005	2.08688	0.848785	Wang et al. 2016
Cretaceous	Pyrite	Tuanjiegou	W-9	108	18.378	0.002	15.564	0.002	38.179	0.005	2.07743	0.846882	Wang et al. 2016
Cretaceous	Pyrite	Tuanjiegou	W-10	108	18.347	0.002	15.596	0.002	38.255	0.005	2.08508	0.850057	Wang et al. 2016
Cretaceous	Pyrite	Tuanjiegou	Kb21T-4	108	18.229	0.002	15.53	0.002	38.128	0.004	2.09161	0.851939	Han 2013
Cretaceous	Pyrite	Yongxin	ZK18005-5	115	18.17		15.47		37.96		2.08916	0.851403	Li 2018
Cretaceous	Pyrite	Yongxin	ZK18010-1	115	18.16		15.52		38.07		2.09637	0.854626	Li 2018
Cretaceous	Pyrite	Yongxin	ZK17001-3	115	18.31		15.61		38.47		2.10104	0.85254	Li 2018
Cretaceous	Pyrite	Yongxin	ZK17508-1	115	18.31		15.63		38.12		2.08192	0.853632	Li 2018
Cretaceous	Pyrite	Yongxin	ZK17005-2	115	18.23		15.59		38.16		2.09325	0.855184	Li 2018
Cretaceous	Pyrite	Yongxin	ZK17006-1	115	18.26		15.6		38.16		2.08981	0.854326	Li 2018
Cretaceous	Pyrite	Yongxin	ZK17503-1	115	18.23		15.58		38.22		2.09654	0.854635	Li 2018
Cretaceous	Pyrite	Yongxin	ZK18003-3	115	18.158		15.522		37.977		2.09147	0.85483	Li 2018
Cretaceous	Pyrite	Yongxin	ZK18502-1	115	18.189		15.567		38.122		2.09588	0.855847	Li 2018
Cretaceous	Pyrite	Yongxin	ZK18015	115	18.193		15.56		38.096		2.09399	0.855274	Li 2018
Cretaceous	Pyrite	Yongxin	ZK17502-1	115	18.159		15.533		38.005		2.0929	0.855389	Li 2018
Cretaceous	Pyrite	Yongxin	ZK17006-2	115	18.2		15.58		37.83		2.07857	0.856044	Li 2018
Cretaceous	Pyrite	Yongxin	ZK18005-8	115	18.13		15.53		37.75		2.08218	0.856591	Li 2018
Cretaceous	Pyrite	Yongxin	ZK160-9-11-1	115	18.255	0.002	15.52	0.002	37.962	0.004	2.07954	0.850178	Zhao et al. 2020
Cretaceous	Pyrite	Yongxin	TC165-25-1	115	18.172	0.003	15.521	0.002	38.016	0.006	2.09201	0.854116	Zhao et al. 2020
Cretaceous	Pyrite	Yongxin	ZK160-9-9-1	115	18.126	0.001	15.492	0.001	37.88	0.002	2.08982	0.854684	Zhao et al. 2020
Cretaceous	Pyrite	Yongxin	ZK160-9-10-1	115	18.235	0.003	15.508	0.003	37.896	0.009	2.0782	0.850452	Zhao et al. 2020
Cretaceous	Pyrite	Yongxin	ZK180-6-23-1	115	18.134	0.001	15.503	0.001	38.019	0.002	2.09656	0.854913	Zhao et al. 2020
Cretaceous	Pyrite	Yongxin	185-3YX-2	115	18.139	0.002	15.513	0.002	37.935	0.004	2.09135	0.855229	Zhao et al. 2020
Cretaceous	Pyrite	Yongxin	175-11YX-5	115	18.145	0.002	15.513	0.001	37.951	0.003	2.09154	0.854946	Zhao et al. 2020
Cretaceous	Pyrite	Yongxin	180-17YX-1	115	18.167	0.003	15.537	0.002	38.014	0.005	2.09248	0.855232	Zhao et al. 2020
Cretaceous	Pyrite	Yongxin	180-11YX-3	115	18.181	0.002	15.531	0.002	38.004	0.004	2.09031	0.854243	Zhao et al. 2020
Cretaceous	Pyrite	Yongxin	175-11YX-3	115	18.142	0.002	15.514	0.002	37.943	0.004	2.09145	0.855143	Zhao et al. 2020
Cretaceous	Pyrite	Keluo	KLZK1906	104	18.194		15.584		38.192		2.09915	0.856546	Li 2018
Cretaceous	Pyrite	Keluo	KLZK2104	104	18.194		15.574		38.153		2.09701	0.855996	Li 2018
Cretaceous	Pyrite	Keluo	KL2108	104	18.186		15.542		38.075		2.09364	0.854613	Li 2018
Cretaceous	Pyrite	Keluo	KL21B02	104	18.157		15.542		38.032		2.09462	0.855978	Li 2018
Cretaceous	Pyrite	Keluo	KLZK2105-1	104	18.186		15.556		38.092		2.09458	0.855383	Li 2018
Cretaceous	Pyrite	Keluo	KLZK2105-2	104	18.206		15.594		38.207		2.09859	0.856531	Li 2018
Cretaceous	Pyrite	Keluo	KLZK1902	104	18.211		15.582		38.167		2.09582	0.855637	Li 2018
Cretaceous	Pyrite	Keluo	KLZK0903	104	18.206		15.593		38.218		2.0992	0.856476	Li 2018
Cretaceous	Pyrite	Dong'an	Da6		18.6106	0.0009	15.5738	0.0008	38.3288	0.002	2.05951	0.836824	Han 2013
Cretaceous	Pyrite	Dong'an	Da7		18.7229	0.0006	15.5864	0.0005	38.3919	0.0012	2.05053	0.832478	Han 2013
Cretaceous	Pyrite	Gaosongshan	GT-I-1	99	18.137	0.001	15.514	0.001	38.005	0.003	2.09544	0.855379	Hao et al. 2016
Cretaceous	Pyrite	Gaosongshan	GT-2IV-6	99	18.394	0.002	15.569	0.002	38.227	0.004	2.07823	0.846417	Hao et al. 2016
Cretaceous	Pyrite	Gaosongshan	GT-III-7	99	18.382	0.002	15.563	0.002	38.201	0.004	2.07817	0.846643	Hao et al. 2016
Cretaceous	Pyrite	Gaosongshan	GF-I-49	99	18.147	0.002	15.515	0.002	38.395	0.005	2.11578	0.854962	Hao et al. 2016
Cretaceous	Pyrite	Gaosongshan	GB-2IV-65	99	18.459	0.002	15.568	0.002	38.28	0.004	2.07379	0.843383	Hao et al. 2016
Cretaceous	Pyrite	Gaosongshan	ZK3102-10		18.856		15.674		38.921		2.06412	0.831247	Zheng et al. 2013
Cretaceous	Pyrite	Gaosongshan	ZK4703-10		18.475		15.57		38.3		2.07307	0.84276	Zheng et al. 2013
Cretaceous	Pyrite	Gaosongshan	ZK7901-08		18.58		15.633		38.548		2.0747	0.841389	Zheng et al. 2013
Cretaceous	Pyrite	Gaosongshan	ZK1501-07		18.566		15.633		38.456		2.07131	0.842023	Zheng et al. 2013
Cretaceous	Pyrite	Gaosongshan	ZK4701-20, 28		18.47		15.55		38.236		2.07017	0.841906	Zheng et al. 2013
Cretaceous	Pyrite	Gaosongshan	ZK3902-15		18.507		15.584		38.357		2.07257	0.84206	Zheng et al. 2013
Cretaceous	Pyrite	Gaosongshan	ZK2402-05		18.563		15.592		38.305		2.06351	0.83995	Zheng et al. 2013
Cretaceous	Pyrite	Gaosongshan	ZK8801-02		18.496		15.644		38.607		2.08732	0.845804	Zheng et al. 2013
Cretaceous	Pyrite	Gaosongshan	ZK0001-09, 10		18.45		15.569		38.257		2.07355	0.843848	Zheng et al. 2013
Cretaceous	Pyrite	Gaosongshan	ZK3101-13		18.596		15.593		38.391		2.06448	0.838514	Zheng et al. 2013
Cretaceous	Pyrite	Gaosongshan	2-ⅡZK9602-13		18.553		15.591		38.38		2.06867	0.840349	Zheng et al. 2013
Cretaceous	Pyrite	Gaosongshan	2-ⅠZK4801-06, 08		18.478		15.573		38.31		2.07328	0.842786	Zheng et al. 2013
Cretaceous	Pyrite	Gaosongshan	ZK8001-11, 12		18.481		15.572		38.304		2.07262	0.842595	Zheng et al. 2013
Cretaceous	Pyrite	Gaosongshan	2-ⅡZK9601-04-06		18.593		15.635		38.649		2.07869	0.840908	Zheng et al. 2013
Cretaceous	Pyrite	Gaosongshan	1-ⅡZK1502-06		18.491		15.582		38.313		2.07198	0.84268	Zheng et al. 2013
Cretaceous	Pyrite	Gaosongshan	2-ⅡZK10801-16		18.551		15.559		38.362		2.06792	0.838715	Zheng et al. 2013
Cretaceous	Pyrite	Gaosongshan	ZK2302-20		18.493		15.585		38.328		2.07257	0.842751	Zheng et al. 2013
Cretaceous	Pyrite	Gaosongshan	ZK3902-08		18.569		15.603		38.501		2.0734	0.840271	Zheng et al. 2013
Cretaceous	Pyrite	Gaosongshan	ZK7901-16		18.503		15.636		38.709		2.09204	0.845052	Zheng et al. 2013
Cretaceous	Pyrite	Gaosongshan	TK1-2		18.522		15.59		38.405		2.07348	0.841702	Zheng et al. 2013
Cretaceous	Pyrite	Gaosongshan	TK1-1		18.472		15.578		38.314		2.07417	0.84333	Zheng et al. 2013
Cretaceous	Pyrite	Gaosongshan	GSS20-4		18.437		15.547		38.209		2.07241	0.84325	Liu et al. 2020
Cretaceous	Pyrite	Gaosongshan	GSS(1)		18.453		15.557		38.244		2.07251	0.843061	Liu et al. 2020
Cretaceous	Pyrite	Gaosongshan	GSS(2)		19.298		15.635		38.961		2.01891	0.810188	Liu et al. 2020
References
1	Basu AR, Wang JW, Huang WK, Xie GH and Tatsumoto M (1991) Major element, REE, and Pb, Nd and Sr isotopic geochemistry of Cenozoic volcanic rocks of east-ern China: implications for their origin from suboceanic-type mantle reservoirs. Earth and Planetary Science Letters 105: 149-169.
2	Chen X, Liu JJ, Zhang DH, Zhang QB, Yang SS, Li YC and Cao Q (2017) Re-Os dating of molybdenites and S-Pb isotopic characteristics of the Cuihongshan iron polymetallic deposit, Heilongjiang Province. Acta Petrologica Sinica 33: 529-544 (in Chinese with English abstract).
3	Deng K, Li Q, Chen Y, Zhang C, Zhu X and Xu Q (2018) Geochronology, geochemistry and Sr-Nd-Pb-Hf isotopes of the Early Jurassic granodiorite from the Sankuanggou intrusion, Heilongjiang Province, Northeastern China: Petrogenesis and geodynamic implications. Lithos 296: 113-128.
4	Du Q (1988) Geology of Duobaoshan porphyry copper deposit Geological Publishing House, Beijing, pp 1-386 (in Chinese with English abstract).
5	Gao R, Xue C, Lv X, Zhao X, Yang Y and Li C (2017c) Genesis of the Zhengguang gold deposit in the Duobaoshan ore field, Heilongjiang Province, NE China: Constraints from geology, geochronology and S-Pb isotopic compositions. Ore Geology Reviews 84: 202-217.
6	Gao S, Xu H, Quan SL, Zang YQ and Wang T (2018) Geology, hydrothermal fluids, H-O-S-Pb isotopes, and Rb-Sr geochronology of the Daxintun orogenic gold deposit in Heilongjiang province, NE China. Ore Geology Reviews 92: 569-587.
7	Gao S, Xu H, Zang YQ, Yang LJ, Yang B and Wang T (2017a) Late Mesozoic magmatism and metallogeny in NE China: The Sandaowanzi-Beidagou example. International Geology Review 59: 1413-1438.
8	Han S (2013) Magmatic fluids and gold mineralization of the late Mesozoic epithermal gold system in northern Lesser Xing’an Range, NE China. PhD thesis, Changchun, China, Jilin University, pp 47-50 (in Chinese with English abstract).
9	Han Z (2004) The metallogenic series and evolution of metal and non-metal ore deposits in Heilongjiang Province. Geological Publishing House, Beijing, pp 1-241 (in Chinese with English abstract).
10	Hao B, Deng J, Bagas L, Ge L, Nie F, Turner S and Qing M (2016) The Gaosongshan epithermal gold deposit in the Lesser Hinggan Range of the Heilongjiang Province, NE China: implications for Early Cretaceous mineralization. Ore Geology Reviews 73: 179-197.
11	Hao Y, Ren Y, Yang Q, Sun Z, Ma Y and Lai K (2020) Fluid and ore sources of the tungsten mineralization in the Yangbishan iron-tungsten deposit, Heilongjiang Province, North-eastern China: Constraints from fluid inclusions, sulfide S-Pb isotopes and scheelite C-H-O-Sm-Nd isotopes. Geological Journal 55: 3957-3976.
12	Hu XL (2015) Mineralization and magmatism of the porphyry Cu and Mo deposits in the northern Great Xing’an and Lesser Xing’an Ranges. PhD thesis, China University of Geosciences (Wuhan), pp 1-137 (in Chinese with English abstract).
13	Li CL (2018) Gold metallogeny and prospecting in the Nenjiang-Heihe tectonic mélange zone, Heilongjiang Province. PhD thesis, China University of Geosciences (Beijing), pp 1-182 (in Chinese with English abstract).
14	Li D (2011) Ore genesis and exploration implication of the Sankuanggou copper polymetallic deposit in Heilongjiang Province, NE China. PhD thesis, China University of Geosciences (Beijing), pp 1-138 (in Chinese with English abstract).
15	Liu J, Li Y, Zhou ZH and Ouyang HG (2017) The Ordovician igneous rocks with high Sr/Y at the Tongshan porphyry copper deposit, satellite of the Duobaoshan deposit, and their metallogenic role. Ore Geology Reviews 86: 600-614.
16	Liu Y, Chu X, Sun J, Han J, Ren L, Gu A, Zhao K and Zhao C (2020) Early Cretaceous bimodal magmatism related epithermal mineralization: A case study of the Gaosongshan gold deposit in the northern Lesser Xing’an Range, NE China. Ore Geology Reviews 21: 103563.
17	Ma YP, Ren YS, Hao YJ, Lai K, Zhao HL and Liu J (2018) Ore genesis and material source of scheelite mineralization of Yangbishan iron-tungsten deposit in Heilongjiang Province, NE China. Journal Jilin University Earth Science Edition 48: 105-117 (in Chinese with English abstract).
18	Rasskazov SV, Chuvashova IS, Liu Y, Meng F, Yasnygina TA, Fefelov NN and Saranina EV (2011) Proportions of lithospheric and asthenospheric components in Late Cenozoic K and K-Na lavas in Heilongjiang Province, Northeastern China. Petrology 19: 568-600.
19	Wang PJ, Chen F, Chen SM, Siebel W and Satir M (2006b) Geochemical and Nd-Sr-Pb isotopic composition of Mesozoic volcanic rocks in the Songliao basin, NE China: Geochemical Journal 40: 149-159.
20	Wang XJ, Chen LH, Hofmann AW, Mao FG, Liu JQ, Zhong Y, Xie LW and Yang YH (2017) Mantle transition zone-derived EM1 component beneath NE China: Geochemical evidence from Cenozoic potassic basalts. Earth and Planetary Science Letters 465: 16-28.
21	Wang Y, Zeng Q, Zhou L, Chu S and Guo Y (2016) The sources of ore-forming material in the low-sulfidation epithermal Wulaga gold deposit, NE China: Constraints from S, Pb isotopes and REE pattern. Ore Geology Reviews 76: 140-151.
22	Zhai DG, Williams-Jones AE, Liu JJ, Tombros SF and Cook NJ (2018) Mineralogical, fluid inclusion and multiple isotope (H-O-S-Pb) constraints on the genesis of the Sandaowanzi epithermal Au-Ag-Te deposit, NE China. Economic Geology 113: 1359-1382.
23	Zhang LL, Liu C, Zhou S, Sun K, Qiu RZ and Feng Y (2014) Characteristics of ore-bearing granites and ore-forming age of the Huojihe molybdenum deposit in Lesser Xing’an Range. Acta Petrologica Sinica 30: 3419-3431 (in Chinese with English abstract).
24	Zhang M, Suddary P, Thompson RN, Thirlwall MF and Menzies MA (1995) Potassic volcanic rocks in NE China: Geochemical constraints on mantle source and magma genesis. Journal Petrology 36: 1275-1303.
25	Zhang YM, Gu XX, Liu RP, Sun X, Li XL and Zheng L (2017) Geology, geochronology and geochemistry of the Gaogangshan Mo deposit: A newly discovered Permo-Triassic collision-type Mo mineralization in the Lesser Xing'an Range, NE China. Ore Geology Reviews 81: 672-688.
26	Zhao Z, Sun J, Li G, Xu W, Lv C, Guo Y, Liu J and Zhang X (2020) Zircon U-Pb geochronology and Sr-Nd-Pb-Hf isotopic constraints on the timing and origin of the Early Cretaceous igneous rocks in the Yongxin gold deposit in the Lesser Xing'an Range, NE China. Geological Journal 55: 2684-2703.
27	Zheng L, Gu XX, Zhang YM and Liu RP (2013) Isotopic geochemistry and its implication to the genesis of Gaosongshan epithermal gold deposit in Heilongjiang Province, China. Acta Mineralogica Sinica 33: 101-109 (in Chinese with English abstract).
28	Zheng Q (2012) Geological characteristics and ore genesis of Zhengguang gold deposit in Heihe area, Heilongjiang Province. MSc thesis, Jilin University, Changchun, China, pp 1-45 (in Chinese with English abstract).
29	Zou HB, Reid MR, Liu YS, Yao YP, Xu XS and Fan QC (2003) Constraints on the origin of historic potassic basalts from northeast China by U–Th disequilibrium data. Chemical Geology 200: 189-201.

## Sheet: Table B3
American Mineralogist: October 2024 Online Materials AM-24-108552 (use tabs to navigate to other tables)
Gao et al.: The origin and evolution of Te in epithermal Au-Ag deposits
Table B3. Published noble gas isotope data from epithermal and intursion-related Au deposits in China and South Korea.
Location	Deposit	Sample no.	Mineral	Stage	3He	4He	20Ne	21Ne	22Ne	36Ar	38Ar	40Ar	3He/36Ar	4He/36Ar	36Ar/4He	20Ne/22Ne	21Ne/22Ne	40Ar/36Ar	38Ar/36Ar	3He/4He	R/RA	4He/20Ne	20Ne/4He	Reference
South Korea	Eunsan	Sn-2	Quartz		1.2e-14	2.69e-09	7.07895e-09			2.15198e-10	4.01345e-11	6.4e-08	5.57625e-05	12.5001	0.0799994			297.4	0.1865	4.46097e-06	4.13	0.38	2.63158	Kim et al. 2012
South Korea	Eunsan	Sn-3	Pyrite		4.99e-13	1.47e-07	8.12155e-10			5.81551e-10	1.08808e-10	1.74e-07	0.000858051	252.772	0.00395613			299.2	0.1871	3.39456e-06	2.42	181	0.00552486	Kim et al. 2012
South Korea	Eunsan	08SR03	Pyrite		1.12e-13	8.29e-08	3.91038e-10			5.75916e-10	1.07869e-10	1.76e-07	0.000194473	143.945	0.00694712			305.6	0.1873	1.35103e-06	0.96	212	0.00471698	Kim et al. 2012
South Korea	Eunsan	08SR01 CR1	Quartz		4.1e-15	2.87e-09	7.22922e-10			6.62749e-10	1.24464e-10	2.03e-07	6.18635e-06	4.33045	0.230923			306.3	0.1878	1.42857e-06	1.02	3.97	0.251889	Kim et al. 2012
South Korea	Eunsan	08SR01 CR2	Quartz		5.9e-15	1.53e-09	2.67483e-10			1.88622e-10	3.52723e-11	6.2e-08	3.12795e-05	8.11147	0.123282			328.7	0.187	3.85621e-06	2.75	5.72	0.174825	Kim et al. 2012
South Korea	Eunsan	08SR04	Quartz		6.6e-15	1.39e-09	2.87785e-09			3.14708e-09	5.8693e-10	9.8e-07	2.09718e-06	0.44168	2.26408			311.4	0.1865	4.7482e-06	3.4	0.483	2.07039	Kim et al. 2012
South Korea	Eunsan	08SR03	Quartz		3.6e-15	1.25e-08	1.01626e-09			9.58683e-10	1.80424e-10	2.97e-07	3.75515e-06	13.0387	0.0766946			309.8	0.1882	2.88e-07	0.21	12.3	0.0813008	Kim et al. 2012
South Korea	Eunsan	08SR04	Pyrite		1.03e-13	7.42e-08	6.68468e-10			9.17342e-10	1.72552e-10	2.83e-07	0.000112281	80.8859	0.0123631			308.5	0.1881	1.38814e-06	1	111	0.00900901	Kim et al. 2012
South Korea	Moisan	09SR19	Quartz		9.2e-15	9.6e-10	2.44275e-09			1.9304e-09	3.64074e-10	5.88e-07	4.76585e-06	0.497306	2.01083			304.6	0.1886	9.58333e-06	6.9	0.393	2.54453	Kim et al. 2012
South Korea	Moisan	09SR01	Pyrite		2.5e-14	7.3e-08	5.57252e-10			5.2999e-10	9.86842e-11	1.67e-07	4.71707e-05	137.738	0.00726014			315.1	0.1862	3.42466e-07	0.24	131	0.00763359	Kim et al. 2012
South Korea	Moisan	09SR07	Quartz		5.5e-15	2.57e-08	3.84731e-10			5.36145e-10	1.01224e-10	1.78e-07	1.02584e-05	47.9348	0.0208617			332	0.1888	2.14008e-07	0.15	66.8	0.0149701	Kim et al. 2012
South Korea	Moisan	Sn-1	Quartz		1.6e-14	3.05e-09	4.25978e-10			8.67638e-10	1.62769e-10	2.74e-07	1.84409e-05	3.51529	0.284471			315.8	0.1876	5.2459e-06	3.9	7.16	0.139665	Kim et al. 2012
South Korea	Gasado	GS-02-01 CR1	Quartz		8.8e-15	1.31e-09	3.91045e-10			4.42453e-10	8.37564e-11	1.58e-07	1.98891e-05	2.96077	0.33775			357.1	0.1893	6.71756e-06	4.8	3.35	0.298507	Kim et al. 2012
South Korea	Gasado	GS-02-01 CR2	Quartz		7.9e-15	9.37e-10	1.85913e-10			2.02767e-10	3.82419e-11	8.5e-08	3.89609e-05	4.62106	0.2164			419.2	0.1886	8.43116e-06	6	5.04	0.198413	Kim et al. 2012
South Korea	Gasado	GS-03-2	Quartz		7.3e-15	5.9e-10	6.55556e-09			4.89292e-09	9.20847e-10	1.485e-06	1.49195e-06	0.120582	8.29308			303.5	0.1882	1.23729e-05	8.9	0.09	11.1111	Kim et al. 2012
South Korea	Gasado	GS-03-1	Quartz		5.3e-15	6.1e-10	1.43192e-09			1.55178e-09	2.89872e-10	5.02e-07	3.41544e-06	0.393098	2.5439			323.5	0.1868	8.68852e-06	6.3	0.426	2.34742	Kim et al. 2012
South Korea	Gasado	GS-02-2	Quartz		5e-15	5.92e-09	1e-09			1.28157e-09	2.37603e-10	4.11e-07	3.90146e-06	4.61933	0.216482			320.7	0.1854	8.44595e-07	0.61	5.92	0.168919	Kim et al. 2012
South Korea	Tongyoung	Ty-1			1.6e-14	1.04e-08	1.33848e-09			2.32034e-09	4.39936e-10	7.2e-07	6.89556e-06	4.48211	0.223109			310.3	0.1896	1.53846e-06	1.16	7.77	0.1287	Kim et al. 2012
South Korea	Kwangyang	Ky-1	Quartz		2.5e-14	1.57e-08	1.60204e-09			1.17792e-09	2.21803e-10	8.58e-07	2.12238e-05	13.3285	0.075027			728.4	0.1883	1.59236e-06	1.24	9.8	0.102041	Kim et al. 2012
South Korea	Kwangyang	Ky-2	Pyrite		1.98e-13	5.27e-08	2.05058e-10			4.87958e-10	8.99307e-11	2.33e-07	0.000405773	108.001	0.00925917			477.5	0.1843	3.75712e-06	2.69	257	0.00389105	Kim et al. 2012
North Heilongjiang Belt, NE China	Sandaowanzi	09SD-23	Pyrite		3.52548e-15	2.1e-07				8.55104e-10		2.54e-07	4.12287e-06	245.584	0.00407192			297.04		1.6788e-08	0.012			Zhai et al. 2015
North Heilongjiang Belt, NE China	Sandaowanzi	09SD-39	Pyrite		2.6553e-15	1.46e-07				1.03849e-09		3.06e-07	2.5569e-06	140.589	0.00711291			294.66		1.8187e-08	0.013			Zhai et al. 2015
North Heilongjiang Belt, NE China	Sandaowanzi	09SD-40	Pyrite		1.83129e-15	1.19e-07				1.02884e-09		3.05e-07	1.77995e-06	115.664	0.00864573			296.45		1.5389e-08	0.011			Zhai et al. 2015
North Heilongjiang Belt, NE China	Sandaowanzi	09SD-50	Pyrite		6.87189e-15	3.07e-07				2.07053e-09		6.13e-07	3.31891e-06	148.271	0.00674439			296.06		2.2384e-08	0.016			Zhai et al. 2015
North Heilongjiang Belt, NE China	Sandaowanzi	12SD-35	Pyrite		6.4298e-15	3.83e-07				8.87884e-10		2.63e-07	7.24172e-06	431.363	0.00231823			296.21		1.6788e-08	0.012			Zhai et al. 2015
North Heilongjiang Belt, NE China	Sandaowanzi	12SD-38	Pyrite		5.09236e-15	2.6e-07				9.27215e-10		2.73e-07	5.4921e-06	280.41	0.00356621			294.43		1.9586e-08	0.014			Zhai et al. 2015
North Heilongjiang Belt, NE China	Sandaowanzi	130 cm19-L1	Pyrite		2.72805e-13	1.95e-05				6.37045e-10		2.39e-07	0.000428235	30610.1	3.2669e-05			375.17		1.399e-08	0.01			Yu et al. 2012
North Heilongjiang Belt, NE China	Sandaowanzi	170 cm31-1	Quartz		4.99443e-15	1.19e-07				8.7106e-10		4.56e-07	5.73374e-06	136.615	0.00731983			523.5		4.197e-08	0.03			Yu et al. 2012
North Heilongjiang Belt, NE China	Sandaowanzi	130 cm23-7	Quartz	II	3.02184e-15	8e-09				1.13304e-09		5.38e-07	2.66703e-06	7.06067	0.14163			474.83		3.7773e-07	0.27			Yu et al. 2012
North Heilongjiang Belt, NE China	Sandaowanzi	130 cm25-L2	Chalcopyrite	II	8.06943e-14	5.6e-08				1.92661e-10		6.3e-08	0.000418842	290.667	0.00344037			327		1.44097e-06	1.03			Yu et al. 2012
North Heilongjiang Belt, NE China	Sandaowanzi	130 cm23-15	Chalcopyrite	II	1.36514e-13	2.38e-07				1.1236e-09		3.61e-07	0.000121498	211.82	0.00472099			321.29		5.7359e-07	0.41			Yu et al. 2012
North Heilongjiang Belt, NE China	Sandaowanzi	130 cm23-15	Petzite	III	5.33858e-14	4.77e-07				2.68193e-10		8.2e-08	0.000199058	1778.57	0.000562249			305.75		1.1192e-07	0.08			Yu et al. 2012
North Heilongjiang Belt, NE China	Sandaowanzi	130 cm23-13	Petzite	III	2.26638e-14	5.4e-08				5.0502e-10		1.66e-07	4.48771e-05	106.927	0.00935222			328.7		4.197e-07	0.3			Yu et al. 2012
North Heilongjiang Belt, NE China	Sandaowanzi	09SD-47	Petzite	III	1.11248e-14	1.4e-08				5.36854e-10		1.59e-07	2.07223e-05	26.0779	0.0383467			296.17		7.94632e-07	0.568			Zhai et al. 2015
North Heilongjiang Belt, NE China	Yongxin	D17508	Pyrite		1.01316e-12	4.26e-07				8.62786e-10		4.77e-07	0.00117428	493.749	0.00202532			552.86		2.3783e-06	1.7			Li 2018
North Heilongjiang Belt, NE China	Yongxin	D18010	Pyrite		7.68303e-13	6.78e-07				6.87836e-10		4.38e-07	0.00111699	985.701	0.00101451			636.78		1.13319e-06	0.81			Li 2018
North Heilongjiang Belt, NE China	Yongxin	D18017	Pyrite		1.3422e-12	5.33e-07				8.03887e-10		5.08e-07	0.00166964	663.029	0.00150823			631.93		2.5182e-06	1.8			Li 2018
North Heilongjiang Belt, NE China	Yongxin	D18502	Pyrite		1.16341e-13	1.32e-07				2.51703e-10		9.79e-08	0.000462214	524.427	0.00190684			388.95		8.8137e-07	0.63			Li 2018
North Heilongjiang Belt, NE China	Keluo	ZK2105-2	Pyrite		1.0811e-12	4.64e-07				4.28247e-10		2.45e-07	0.00252448	1083.49	0.000922946			572.1		2.32996e-06	1.66			Li et al. 2020
North Heilongjiang Belt, NE China	Keluo	ZK2104	Pyrite		2.405e-13	3.35e-07				1.29293e-10		5.27e-08	0.00186011	2591.01	0.000385951			407.6		7.1791e-07	0.51			Li et al. 2020
North Heilongjiang Belt, NE China	Keluo	ZK21B03	Pyrite		8.134e-13	4.99e-07				6.67656e-10		3.6e-07	0.00121829	747.391	0.00133799			539.2		1.63006e-06	1.16			Li et al. 2020
North Heilongjiang Belt, NE China	Gaosongshan	GSS8-1	Quartz	II	5.68e-14	3.55e-08				1.10607e-08		3.41e-06	5.13532e-06	3.20957	0.311568			308.3		1.6e-06	1.14			Zhang et al. 2019a
North Heilongjiang Belt, NE China	Gaosongshan	GSS10-1	Quartz	II	7.3365e-14	2.01e-08				5.54324e-09		1.75e-06	1.3235e-05	3.62604	0.275783			315.7		3.65e-06	2.61			Zhang et al. 2019a
North Heilongjiang Belt, NE China	Gaosongshan	FQ2-2	Quartz	III	2.6313e-14	1.79e-08				4.24588e-09		1.34e-06	6.1973e-06	4.21585	0.2372			315.6		1.47e-06	1.05			Zhang et al. 2019a
North Heilongjiang Belt, NE China	Gaosongshan	FQ2-6	Quartz	III	5.7148e-14	1.57e-08				6.7459e-09		2.1e-06	8.47151e-06	2.32734	0.429675			311.3		3.64e-06	2.6			Zhang et al. 2019a
North Heilongjiang Belt, NE China	Tuanjiegou	HT-27	Pyrite		1.10145e-14	1.05e-08				3.28654e-10	6.12019e-11	9.67e-08	3.35139e-05	31.9484	0.0313004			294.23	0.18622	1.049e-06	0.75			He et al. 2023
North Heilongjiang Belt, NE China	Tuanjiegou	HT-39	Pyrite		4.5792e-14	2.65e-08				3.80475e-10	7.15178e-11	1.138e-07	0.000120355	69.6498	0.0143575			299.1	0.18797	1.728e-06	1.23			He et al. 2023
North Heilongjiang Belt, NE China	Tuanjiegou	HT-43	Pyrite		3.22012e-14	2.23e-08				2.54214e-10	4.72516e-11	7.3e-08	0.00012667	87.7215	0.0113997			287.16	0.185874	1.444e-06	1.03			He et al. 2023
East Jilin-Heilongjiang Belt, NE China	Xiaoxinancha	N11-3a	Chalcopyrite		1.0957e-12	1.76e-07	9.93e-08	2.9292e-10	9.76401e-09	1.59774e-10	2.99897e-11	5.1e-08	0.00685777	1101.55	0.000907809	10.17	0.03	319.2	0.1877	6.22555e-06	4.45		0.564205	Sun et al. 2008
East Jilin-Heilongjiang Belt, NE China	Xiaoxinancha	N11-3b	Pyrrhotite		8.51655e-13	1.71e-07	1.88e-08	5.74924e-11	1.91641e-09	1.88072e-10	3.53576e-11	6.78e-08	0.00452834	909.226	0.00109984	9.81	0.03	360.5	0.188	4.98044e-06	3.56		0.109942	Sun et al. 2008
East Jilin-Heilongjiang Belt, NE China	Xiaoxinancha	N24a	Pyrite		1.66716e-12	1.064e-06	4.43e-08	1.35612e-10	4.52041e-09	5.61654e-10	1.06265e-10	2.2e-07	0.0029683	1894.4	0.000527871	9.8	0.03	391.7	0.1892	1.56688e-06	1.12		0.0416353	Sun et al. 2008
East Jilin-Heilongjiang Belt, NE China	Xiaoxinancha	N24b	Pyrrhotite		2.21702e-13	5.68e-08	3.65e-09	1.0961e-11	3.65365e-10	1.08335e-11	2.02154e-12	4.51e-09	0.0204645	5242.98	0.000190731	9.99	0.03	416.3	0.1866	3.90321e-06	2.79		0.0642606	Sun et al. 2008
East Jilin-Heilongjiang Belt, NE China	Xiaoxinancha	N24c	Chalcopyrite		2.45726e-12	6.12e-07	1.34e-07	3.9881e-10	1.32937e-08	1.99674e-10	3.76586e-11	8.58e-08	0.0123063	3064.99	0.000326265	10.08	0.03	429.7	0.1886	4.01513e-06	2.87		0.218954	Sun et al. 2008
East Jilin-Heilongjiang Belt, NE China	Xiaoxinancha	B580-6a	Pyrite		4.96673e-14	1.94e-08	4.06e-09	1.23279e-11	4.10931e-10	8.2454e-12	1.53942e-12	3.36e-09	0.00602364	2352.83	0.000425021	9.88	0.03	407.5	0.1867	2.56017e-06	1.83		0.209278	Sun et al. 2008
East Jilin-Heilongjiang Belt, NE China	Xiaoxinancha	B580-6b	Melnicovite		2.87355e-14	1.58e-07	4.08e-09	1.23512e-11	4.11705e-10	1.12454e-11	2.10401e-12	4.84e-09	0.00255532	14050.2	7.11731e-05	9.91	0.03	430.4	0.1871	1.8187e-07	0.13		0.0258228	Sun et al. 2008
East Jilin-Heilongjiang Belt, NE China	Xiaoxinancha	B580-6a	Pyrite		4.52143e-14	1.71e-08	4.22e-09	1.43537e-11	4.78458e-10	7.93138e-12	1.48396e-12	3.19e-09	0.00570068	2155.99	0.000463823	8.82	0.03	402.2	0.1871	2.64411e-06	1.89		0.246784	Sun et al. 2008
East Jilin-Heilongjiang Belt, NE China	Xiaoxinancha	B595-3a	Pyrite		4.42084e-14	3.95e-07	1.12e-08	3.44969e-11	1.1499e-09	5.11529e-11	9.61675e-12	1.93e-08	0.00086424	7721.94	0.000129501	9.74	0.03	377.3	0.188	1.1192e-07	0.08		0.0283544	Sun et al. 2008
East Jilin-Heilongjiang Belt, NE China	Xiaoxinancha	B542-3a	Chalcopyrite		7.11475e-14	3.12e-07	1.11e-08	3.31343e-11	1.10448e-09	2.87251e-11	5.33426e-12	8.81e-09	0.00247684	10861.6	9.20678e-05	10.05	0.03	306.7	0.1857	2.28037e-07	0.163		0.0355769	Sun et al. 2008
East Jilin-Heilongjiang Belt, NE China	Jinchang	II-5	Pyrite	III	9.16e-14	4.14e-08				1.07e-10	1.9902e-11	3.59e-08	0.000856075	386.916	0.00258454			335.3	0.186	2.21256e-06	1.58			Yu et al. 2017
East Jilin-Heilongjiang Belt, NE China	Jinchang	II-10	Pyrite	IV	1.83e-14	3.53e-08				1.79e-10	3.3831e-11	5.54e-08	0.000102235	197.207	0.00507082			308.9	0.189	5.18414e-07	0.37			Yu et al. 2017
East Jilin-Heilongjiang Belt, NE China	Jinchang	II-11	Pyrite	III	6.26e-14	3.15e-08				1.95e-10	3.666e-11	6.44e-08	0.000321026	161.538	0.00619048			330.7	0.188	1.9873e-06	1.42			Yu et al. 2017
East Jilin-Heilongjiang Belt, NE China	Jinchang	JC-1	Pyrite	III	3.85e-14	2.62e-08				1.39e-10	2.5715e-11	4.38e-08	0.000276978	188.489	0.00530534			316	0.185	1.46947e-06	1.05			Yu et al. 2017
East Jilin-Heilongjiang Belt, NE China	Jinchang	JC-4	Pyrite	IV	1.267e-13	1.646e-07				2.53e-10	4.7564e-11	8.53e-08	0.000500791	650.593	0.00153706			336.7	0.188	7.69745e-07	0.55			Yu et al. 2017
East Jilin-Heilongjiang Belt, NE China	Jinchang	JC-5	Pyrite	I	8.23e-14	2.43e-08				1.18e-10	2.2066e-11	3.88e-08	0.000697458	205.932	0.00485597			327.6	0.187	3.38683e-06	2.42			Yu et al. 2017
East Jilin-Heilongjiang Belt, NE China	Jinchang	JC-8	Pyrite	IV	6.56e-14	1.041e-07				3.99e-10	7.4613e-11	1.289e-07	0.000164411	260.902	0.00383285			322.8	0.187	6.30163e-07	0.45			Yu et al. 2017
East Jilin-Heilongjiang Belt, NE China	Jinchang	JC-9	Pyrite	II	1.913e-13	5.89e-08				7.29e-10	1.37781e-10	2.388e-07	0.000262414	80.7956	0.0123769			327.4	0.189	3.24788e-06	2.32			Yu et al. 2017
East Jilin-Heilongjiang Belt, NE China	Jinchang	12-1	Pyrite	V	9.45e-14	5.193e-07				6.76e-10	1.27088e-10	2.141e-07	0.000139793	768.195	0.00130175			316.8	0.188	1.81976e-07	0.13			Yu et al. 2017
East Jilin-Heilongjiang Belt, NE China	Jinchang	12-2	Pyrite	V	3.4e-14	1.348e-07				1.23e-10	2.2878e-11	3.84e-08	0.000276423	1095.93	0.000912463			311.5	0.186	2.52226e-07	0.18			Yu et al. 2017
East Jilin-Heilongjiang Belt, NE China	Jiusangou	Jsg-1	Pyrite		3.4e-14	1.677e-06	0.419	0.00131	0.0425	5.77e-10	1.1e-10	7.52e-07	5.89255e-05	2906.41	0.000344067			1302.4	0.19011	2.06e-08	0.0147248		249851	Zhao et al. 2017
East Jilin-Heilongjiang Belt, NE China	Jiusangou	Jsg-2	Pyrite		4e-14	3.067e-06	0.35	0.00115	0.0359	5.61e-10	1.06e-10	1.115e-06	7.13012e-05	5467.02	0.000182915			1990	0.18962	1.32e-08	0.00943531		114118	Zhao et al. 2017
East Jilin-Heilongjiang Belt, NE China	Duhuangling	Dhl-1	Pyrite		1.16e-13	1.2032e-05	0.405	0.00168	0.0413	5.81e-10	1.12e-10	2.577e-06	0.000199656	20709.1	4.82879e-05			4433.6	0.1927	9.6e-09	0.00686204		33660.2	Zhao et al. 2017
East Jilin-Heilongjiang Belt, NE China	Duhuangling	Dhl-2	Pyrite		1.66e-13	1.497e-05	0.951	0.0033	0.0966	1.245e-09	2.37e-10	3.128e-06	0.000133333	12024.1	8.31663e-05			2511.6	0.19011	1.11e-08	0.00793424		63527.1	Zhao et al. 2017
East Jilin-Heilongjiang Belt, NE China	Xiaobeigou	BG890102-1	Pyrite		1.13e-11	5.434e-06				1.245e-09		1.35e-06	0.00907631	4364.66	0.000229113			5393		2.0795e-06	1.5			Zeng et al. 2014
East Jilin-Heilongjiang Belt, NE China	Xiaobeigou	BG890164	Pyrite		7.5e-12	3.893e-06				1.245e-09		7.89e-07	0.0060241	3126.91	0.000319805			5262		1.92653e-06	1.4			Zeng et al. 2014
East Jilin-Heilongjiang Belt, NE China	Xiaobeigou	BG650181-2	Pyrite		2.9e-12	1.573e-06				1.245e-09		2.267e-06	0.00232932	1263.45	0.000791481			4417		1.84361e-06	1.3			Zeng et al. 2014
East Jilin-Heilongjiang Belt, NE China	Xiaobeigou	BG890142	Pyrite		1.65e-11	7.598e-06				1.245e-09		7.567e-06	0.013253	6102.81	0.000163859			4928		2.17162e-06	1.5			Zeng et al. 2014
East Jilin-Heilongjiang Belt, NE China	Bajiazi	BJZ280411-6	Pyrite		1.9e-12	1.187e-06				1.245e-09		4.28e-06	0.0015261	953.414	0.00104886			6197		1.60067e-06	1.1			Zeng et al. 2014
East Jilin-Heilongjiang Belt, NE China	Bajiazi	BJ280373-1	Pyrite		3.3e-12	1.966e-06				1.245e-09		7.517e-06	0.0026506	1579.12	0.000633266			6201		1.67854e-06	1.2			Zeng et al. 2014
East Jilin-Heilongjiang Belt, NE China	Bajiazi	BJZ560413-7	Pyrite		6.6e-12	3.955e-06				1.245e-09		8.915e-06	0.0053012	3176.71	0.000314791			4791		1.66877e-06	1.2			Zeng et al. 2014
East Jilin-Heilongjiang Belt, NE China	Erdaogou	ED1140105-4	Pyrite		8.1e-12	2.315e-06				1.245e-09		9.134e-06	0.00650602	1859.44	0.000537797			9805		3.49892e-06	2.5			Zeng et al. 2014
East Jilin-Heilongjiang Belt, NE China	Erdaogou	ED1050119-1	Pyrite		5.2e-12	1.639e-06				1.245e-09		1.044e-06	0.00417671	1316.47	0.00075961			6230		3.17267e-06	2.3			Zeng et al. 2014
East Jilin-Heilongjiang Belt, NE China	Sandaogou	SD150118-1	Pyrite		1.8e-12	1.381e-06				1.245e-09		3.199e-06	0.00144578	1109.24	0.000901521			2789		1.3034e-06	1			Zeng et al. 2014
East Jilin-Heilongjiang Belt, NE China	Sandaogou	SD150126-1	Pyrite		3e-13	3.52e-07				1.245e-09		3.72e-07	0.000240964	282.731	0.00353693			1444		8.52273e-07	0.6			Zeng et al. 2014
East Jilin-Heilongjiang Belt, NE China	Sandaogou	Sd740119-2	Pyrite		5e-12	3.1e-06				1.245e-09		2.358e-06	0.00401606	2489.96	0.000401613			2509		1.6129e-06	1.2			Zeng et al. 2014
East Jilin-Heilongjiang Belt, NE China	Jiapigoubenqu	BQ0835-1	Pyrite		1.9e-12	1.331e-06				1.245e-09		3.568e-06	0.0015261	1069.08	0.000935387			7741		1.4275e-06	1			Zeng et al. 2014
East Jilin-Heilongjiang Belt, NE China	Jiapigoubenqu	LS4X-6	Pyrite		1e-12	8.38e-07				1.245e-09		2.518e-06	0.000803213	673.092	0.00148568			6137		1.19332e-06	0.9			Zeng et al. 2014
East Jilin-Heilongjiang Belt, NE China	Jiapigoubenqu	LS6-1	Pyrite		1e-12	4.67e-07				1.245e-09		3.402e-06	0.000803213	375.1	0.00266595			4001		2.14133e-06	1.6			Zeng et al. 2014
Jibei, North China	Dongping	DP1-1	Pyrite		1.56408e-11	2.15e-06				6.56958e-09		2.03e-06	0.00238079	327.266	0.00305562			309		7.2748e-06	5.2			Mao et al. 2003
Jibei, North China	Dongping	DP1-2	Pyrite		1.17516e-12	4e-07				1.84e-09		6.9e-07	0.000638674	217.391	0.0046			375		2.9379e-06	2.1			Mao et al. 2003
Jibei, North China	Dongping	DP1-3	Pyrite		4.40685e-13	1.5e-07				1.6318e-09		7.8e-07	0.000270061	91.9231	0.0108787			478		2.9379e-06	2.1			Mao et al. 2003
Jibei, North China	Dongping	DP1-4	Pyrite		4.11306e-13	7e-08				1.0766e-09		5.2e-07	0.00038204	65.0192	0.0153801			483		5.8758e-06	4.2			Mao et al. 2003
Jibei, North China	Dongping	DP1-7-1	Pyrite		3.4975e-13	5e-08				1.2761e-09		5.5e-07	0.000274077	39.1818	0.025522			431		6.995e-06	5			Mao et al. 2003
Jibei, North China	Dongping	DP70-4	Pyrite		5.14832e-13	4.6e-07				3.59848e-10		1.9e-07	0.00143069	1278.32	0.000782279			528		1.1192e-06	0.8			Mao et al. 2003
Jibei, North China	Dongping	DP70-6	Pyrite		6.25353e-13	1.49e-06				3.63924e-10		2.3e-07	0.00171836	4094.26	0.000244244			632		4.197e-07	0.3			Mao et al. 2003
Jibei, North China	Jinchangyu	J57-2	Pyrite		3.03528e-12	6.01e-07				1.83148e-10		1.089e-06	0.0165728	3281.49	0.000304739			5946		5.05039e-06	3.61			Bai et al. 2019
Jibei, North China	Jinchangyu	J57-5	Pyrite		1.40822e-12	3.77e-07				1.24283e-10		6.28e-07	0.0113308	3033.41	0.000329662			5053		3.73533e-06	2.67			Bai et al. 2019
Jibei, North China	Jinchangyu	J103-6	Pyrite		3.21915e-12	5.87e-07				3.41885e-10		1.879e-06	0.0094159	1716.95	0.000582428			5496		5.48408e-06	3.92			Bai et al. 2019
Jibei, North China	Jinchangyu	J1039	Pyrite		7.50759e-13	3.12e-07				8.64291e-11		2.28e-07	0.00868642	3609.89	0.000277016			2638		2.40628e-06	1.72			Bai et al. 2019
Jibei, North China	Jinchangyu	J10316	Pyrite		1.9456e-12	4.53e-07				2.18615e-10		1.266e-06	0.00889968	2072.14	0.000482594			5791		4.29493e-06	3.07			Bai et al. 2019
Jibei, North China	Dabaiyang	hjg-8–3	Pyrite		1.41019e-12	6.3e-07				1.30843e-10		1.54e-06	0.0107777	4814.92	0.000207688			11769.8		2.2384e-06	1.6			Shen et al. 2020
Jibei, North China	Dabaiyang	hjg-9–1	Pyrite		9.00956e-13	4.6e-07				1.03588e-10		6e-07	0.00869753	4440.69	0.00022519			5792.2		1.9586e-06	1.4			Shen et al. 2020
Jibei, North China	Dabaiyang	hjg-10–2	Pyrite		1.83829e-12	7.3e-07				1.12643e-10		9.3e-07	0.0163196	6480.67	0.000154305			8256.2		2.5182e-06	1.8			Shen et al. 2020
Jibei, North China	Dabaiyang	hjg-15–1	Pyrite		8.32405e-13	3.5e-07				8.56796e-11		4.3e-07	0.00971533	4084.99	0.000244799			5018.7		2.3783e-06	1.7			Shen et al. 2020
Jibei, North China	Dabaiyang	hjg-18–1	Pyrite		5.81984e-13	2.6e-07				1.39188e-09		2.181e-05	0.000418129	186.798	0.00535337			15669.5		2.2384e-06	1.6			Shen et al. 2020
Jibei, North China	Dabaiyang	hjg-25–1	Pyrite		1.47734e-12	6.6e-07				1.32609e-10		1.04e-06	0.0111406	4977.03	0.000200923			7842.6		2.2384e-06	1.6			Shen et al. 2020
Jibei, North China	Dabaiyang	hjg-28–1	Pyrite		1.79072e-13	8e-08				1.48048e-10		1.76e-06	0.00120955	540.364	0.00185061			11888		2.2384e-06	1.6			Shen et al. 2020
Jibei, North China	Dabaiyang	hjg-41–1	Pyrite		1.28428e-12	5.1e-07				8.84529e-11		4.4e-07	0.0145194	5765.78	0.000173437			4974.4		2.5182e-06	1.8			Shen et al. 2020
Jibei, North China	Dabaiyang	DBY-15	Pyrite	II	1.62172e-13	8.4e-08				6.8875e-10		2.78e-06	0.000235459	121.96	0.0081994			4036.3		1.93062e-06	1.38			Wang et al. 2021
Jibei, North China	Dabaiyang	DBY-22	Pyrite	II	1.68607e-13	9.2e-08				6.57261e-10		2.32e-06	0.00025653	139.975	0.00714414			3529.8		1.83269e-06	1.31			Wang et al. 2021
Jibei, North China	Dabaiyang	DBY-23	Pyrite	II	5.42476e-13	2.96e-07				1.58775e-09		8.34e-06	0.000341662	186.427	0.00536404			5252.7		1.83269e-06	1.31			Wang et al. 2021
Jibei, North China	Dabaiyang	DBY-44	Pyrite	III	1.01016e-12	4.57e-07				8.93508e-11		1.95e-06	0.0113056	5114.67	0.000195516			21824.1		2.21042e-06	1.58			Wang et al. 2021
Jibei, North China	Dabaiyang	DBY-74	Pyrite	III	4.62132e-13	2.31e-07				1.90599e-09		6.65e-06	0.000242463	121.197	0.00825104			3489		2.00057e-06	1.43			Wang et al. 2021
Jibei, North China	Dabaiyang	DBY-78	Pyrite	III	1.28407e-12	6.33e-07				4.95234e-09		1.86e-05	0.000259286	127.818	0.0078236			3755.8		2.02855e-06	1.45			Wang et al. 2021
Jibei, North China	Honghuagou	H-4	Pyrite		1.1483e-12	2.16e-06				3.39394e-08	6.04121e-09	1.12e-05	3.38338e-05	63.6429	0.0157127			330	0.178	5.3162e-07	0.38			Shi et al. 2021
Jibei, North China	Honghuagou	H-5	Pyrite		1.15725e-12	1.88e-06				7.06499e-09	1.33528e-09	3.37e-06	0.000163801	266.101	0.00375797			477	0.189	6.1556e-07	0.44			Shi et al. 2021
Jibei, North China	Jinchanggouliang	J26-2-11-1	Pyrite		3.24005e-13	1.507e-07				7.85548e-10	1.44884e-10	3.37e-07	0.000412457	191.841	0.00521266			429	0.184437	2.15e-06	1.54			Sun et al. 2006
Jibei, North China	Jinchanggouliang	J26-2-11-2-1	Pyrite		1.61194e-12	8.352e-07				2.31663e-09	4.21743e-10	1.156e-06	0.00069581	360.523	0.00277375			499	0.18205	1.93e-06	1.38			Sun et al. 2006
Jibei, North China	Jinchanggouliang	J26-211-4	Pyrite		4.0032e-14	2.78e-08				1.42568e-09	2.61299e-10	4.22e-07	2.80793e-05	19.4995	0.0512833			296	0.183281	1.44e-06	1.03			Sun et al. 2006
Jibei, North China	Jinchanggouliang	Jd16-1-1	Pyrite		1.0252e-13	2.2e-08				9.36455e-10	1.71827e-10	2.8e-07	0.000109477	23.4929	0.0425661			299	0.183486	4.66e-06	3.33			Sun et al. 2006
Jibei, North China	Jinchanggouliang	J1301	Pyrite		1.242e-13	3.6e-08				1.14377e-09	2.11028e-10	3.58e-07	0.000108588	31.4749	0.0317714			313	0.184502	3.45e-06	2.46			Sun et al. 2006
Jibei, North China	Jinchanggouliang	J26-13-5-1	Pyrite							5.10345e-10	9.31405e-11	1.48e-07						290	0.182505					Sun et al. 2006
Jibei, North China	Jinchanggouliang	Jd16-1-2	Pyrite		8.6875e-13	1.39e-07				5.61218e-09	1.02976e-09	1.751e-06	0.000154797	24.7676	0.0403754			312	0.183486	6.25e-06	4.46			Sun et al. 2006
Jibei, North China	Jinchanggouliang	J15-7-14-4	Pyrite		8.33e-14	1e-08				6.94444e-10	1.26493e-10	2e-07	0.000119952	14.4	0.0694444			288	0.182149	8.33e-06	5.95			Sun et al. 2006
Jibei, North China	Jinchanggouliang	J39-14-1	Pyrite		2.0526e-13	3.3e-08				2.48013e-09	4.5507e-10	7.49e-07	8.27617e-05	13.3057	0.0751555			302	0.183486	6.22e-06	4.44			Sun et al. 2006
Jibei, North China	Zhangquanzhuang	ZQZ-1	Pyrite		2.33521e-13	1.07e-07				1.7037e-09		4.24e-06	0.000137067	62.8045	0.0159224			2488.7		2.18244e-06	1.56			Zhen et al. 2020
Jibei, North China	Zhangquanzhuang	ZQZ-7-2	Pyrite		1.71853e-13	7.4e-08				1.22643e-09		1.99e-06	0.000140125	60.3379	0.0165733			1622.6		2.32234e-06	1.66			Zhen et al. 2020
Jibei, North China	Zhangquanzhuang	ZQZ-15	Pyrite		1.5424e-13	6.3e-08				9.7337e-10		2.12e-06	0.00015846	64.7236	0.0154503			2178		2.44825e-06	1.75			Zhen et al. 2020
Jibei, North China	Zhangquanzhuang	ZQZ-3-2	Pyrite		1.94055e-13	9.7e-08				1.64761e-09		4.38e-06	0.00011778	58.8732	0.0169856			2658.4		2.00057e-06	1.43			Zhen et al. 2020
Jibei, North China	Zhangquanzhuang	ZQZ-5-2	Pyrite		2.06912e-13	1.02e-07				1.65104e-09		4.65e-06	0.000125322	61.7791	0.0161867			2816.4		2.02855e-06	1.45			Zhen et al. 2020
Jibei, North China	Zhangquanzhuang	ZQZ-6-2	Pyrite		2.3727e-13	1.06e-07				1.41258e-09		3.95e-06	0.000167969	75.0399	0.0133262			2796.3		2.2384e-06	1.6			Zhen et al. 2020
Jibei, North China	Zhangquanzhuang	ZQZ-10	Pyrite		1.9919e-13	1.13e-07				2.20015e-09		4.32e-06	9.05344e-05	51.3601	0.0194704			1963.5		1.76274e-06	1.26			Zhen et al. 2020
Jibei, North China	Zhangquanzhuang	ZQZ-13-2	Pyrite		5.39692e-13	2.31e-07				1.90704e-09		5.1e-06	0.000283	121.13	0.00825559			2674.3		2.33633e-06	1.67			Zhen et al. 2020
Jibei, North China	Hougou	Jhg-1	Pyrite		5.2878e-12	2.518e-06				1.42035e-09		9.63e-07	0.00372287	1772.8	0.00056408			678	0.192308	2.1e-06	1.5			Wang et al. 2003
Jibei, North China	Huangtuliang	Jht-1	Pyrite		6.0264e-12	6.48e-06				5.73506e-11		7.1e-08	0.10508	112989	8.8504e-06			1238	0.188679	9.3e-07	0.66			Wang et al. 2003
Jibei, North China	Niujuan	Jnj-1	Pyrite		3.5816e-12	1.78e-07														2.9e-06	2.07			Wang et al. 2003
Jibei, North China	Xiaoyingpan	Jxy-1	Pyrite		5.32e-12	1.628e-06				9.64785e-11		2e-07	0.0551418	16874.2	5.9262e-05			2073	0.181818	2.2e-06	1.57			Wang et al. 2003
Jibei, North China	Jinchangyu	Jic-1	Pyrite		3.9925e-12	1.064e-06				1.59571e-09		1.042e-06	0.00250202	666.787	0.00149973			653	0.188679	5e-06	3.57			Wang et al. 2003
Jibei, North China	Huzhangzi	Jhz-1	Pyrite		6.24e-13	1.597e-06				1.2754e-09		1.042e-06	0.000489259	1252.16	0.000798621			817	0.181818	2.5e-06	1.79			Wang et al. 2003
Jibei, North China	Huashi	Jhs-1	Pyrite		2.6535e-12	9.6e-08				9.93506e-10		3.06e-07	0.00267084	96.6275	0.010349			308	0.188679	6.5e-06	4.64			Wang et al. 2003
Jibei, North China	Shapoyu	Jsp-1	Pyrite		1.5687e-12	9.15e-07				5.41411e-10		7.06e-07	0.00289743	1690.03	0.000591706			1304	0.185185	2.9e-06	2.07			Wang et al. 2003
Jibei, North China	Yuerya	Jye-1	Pyrite		1.26456e-11	5.81e-07				1.24348e-09		7.15e-07	0.0101695	467.238	0.00214024			575	0.185185	2.7e-06	1.93			Wang et al. 2003
Jibei, North China	Tianjiacun	Jtj-1	Pyrite		1.32825e-11	2.874e-06				1.02032e-09		9.04e-07	0.013018	2816.77	0.000355016			886	0.192308	4.4e-06	3.14			Wang et al. 2003
Jibei, North China	Xinglong	Jxl-1	Pyrite		1.548e-12	1.925e-06				5.28638e-09		2.252e-06	0.000292828	364.143	0.00274617			426	0.185185	6.9e-06	4.93			Wang et al. 2003
Jibei, North China	Dongping	Dp-1-1	Quartz		1.2e-13	2.15e-07												309		7.2e-06	5.2			Wang et al. 2003
Jibei, North China	Dongping	Dp-1-2	Quartz		4.35e-14	4e-08												375		3e-06	2.1			Wang et al. 2003
Jibei, North China	Dongping	Dp-1-3	Quartz		4.06e-14	1.5e-08												478		2.9e-06	2.1			Wang et al. 2003
Jibei, North China	Dongping	Dp-1-4	Quartz		3.45e-14	7e-09												483		5.8e-06	4.2			Wang et al. 2003
Jibei, North China	Dongping	Dp-1-7-1	Quartz		5.06e-14	5e-09												431		6.9e-06	5			Wang et al. 2003
Jibei, North China	Dongping	Dp-70-4	Quartz		5.96e-14	4.6e-08												528		1.1e-06	0.8			Wang et al. 2003
Jibei, North China	Dongping	Dp-70-6	Quartz		5.96e-14	1.49e-07												632		4e-07	0.3			Wang et al. 2003
Jibei, North China	Dongping	Dp-1-7-3	Granite		8.504e-14	1.063e-05												1063		8e-09	0.006			Wang et al. 2003
Jibei, North China	Dongping	Dp-70-7	Granite		5.95e-14	8.5e-06												850		7e-09	0.005			Wang et al. 2003
Jibei, North China	Jinchangyu	Jic-2	Gneiss		1.17865e-12	2.143e-06														5.5e-07	0.39			Wang et al. 2003
Jibei, North China	Xiaoyingzi	Jr-9	Granite		4.416e-15	4.416e-06														1e-09	0.0007			Wang et al. 2003
Jibei, North China	Xiaoyingzi	Jr-10	Quartz		3.4656e-13	9.12e-07														3.8e-07	0.27			Wang et al. 2003
Liaodong, North China	Sidaogou	17SD-50-2	Pyrite		8.7e-14	3e-07				2.65999e-10		1.434e-06	0.000327069	1127.82	0.000886663			5391		2.9379e-07	0.21			Feng et al. 2019
Liaodong, North China	Sidaogou	17SD-81	Pyrite		1.48e-13	1.84e-07				3.51005e-10		1.92e-07	0.000421646	524.208	0.00190764			547		7.9743e-07	0.57			Feng et al. 2019
Liaodong, North China	Sidaogou	17SD-5	Pyrite		1.44e-13	3.72e-07				7.60592e-10		1.49e-06	0.000189326	489.093	0.0020446			1959		3.9172e-07	0.28			Feng et al. 2019
Liaodong, North China	Sidaogou	17SD-24	Pyrite		2.91e-13	6.11e-07				4.28931e-09		5.1446e-05	6.78431e-05	142.447	0.00702015			11994		4.7566e-07	0.34			Feng et al. 2019
Liaodong, North China	Sidaogou	17SD-80	Pyrite		2.1e-13	4.72e-07				4.85833e-09		2.9252e-05	4.32247e-05	97.1527	0.0102931			6021		4.4768e-07	0.32			Feng et al. 2019
Liaodong, North China	Wulong	LW-41	Pyrite	Early	1.10814e-13	2.19e-07				3.2597e-10		1.328e-07	0.000339952	671.842	0.00148845			407.4	0.187617	5.06e-07	0.36			Liu et al. 2019
Liaodong, North China	Wulong	LW-42	Pyrite	Early	1.78336e-12	1.9469e-06				1.51254e-09		7.177e-07	0.00117905	1287.17	0.000776896			474.5	0.189036	9.16e-07	0.65			Liu et al. 2019
Liaodong, North China	Wulong	LW-43	Pyrite	Middle	1.05663e-13	2.005e-07				2.50488e-10		1.027e-07	0.000421831	800.438	0.00124932			410	0.186916	5.27e-07	0.38			Liu et al. 2019
Liaodong, North China	Wulong	LW-44	Pyrite	Middle	4.43312e-13	6.306e-07				6.18534e-10		1.949e-07	0.000716714	1019.51	0.000980866			315.1	0.188679	7.03e-07	0.5			Liu et al. 2019
Liaodong, North China	Wulong	LW-45	Pyrite	Middle	3.52299e-13	4.087e-07				1.63564e-09		4.938e-07	0.000215389	249.871	0.00400206			301.9	0.182482	8.62e-07	0.62			Liu et al. 2019
Liaodong, North China	Baiyun	BY-1	Pyrite		2.37181e-12	3.4144e-06				4.8e-10	2.544e-09	2.2382e-06	0.00494127	7113.33	0.000140581			4648.7	5.3	6.95e-07	0.5			Zhang et al. 2019
Liaodong, North China	Baiyun	BY-3	Pyrite		9.31211e-12	1.51411e-05				4.1e-10	2.0787e-09	2.3309e-06	0.0227125	36929.5	2.70786e-05			5636.9	5.07	6.15e-07	0.44			Zhang et al. 2019
Liaodong, North China	Baiyun	BY-4	Pyrite		7.50453e-12	1.25577e-05				2.4e-10	1.2768e-09	1.611e-06	0.0312689	52323.8	1.91118e-05			6805.3	5.32	5.98e-07	0.43			Zhang et al. 2019
Liaodong, North China	Baiyun	BY-5	Pyrite		5.74431e-12	7.9446e-06				4.5e-10	2.394e-09	3.4946e-06	0.0127651	17654.7	5.66422e-05			7685.9	5.32	7.23e-07	0.52			Zhang et al. 2019
Liaodong, North China	Baiyun	BY-6	Pyrite		4.56126e-12	6.7175e-06				4e-10	2.148e-09	2.5155e-06	0.0114031	16793.8	5.9546e-05			6284.4	5.37	6.79e-07	0.49			Zhang et al. 2019
Liaodong, North China	Maoling	MLR-1	Arsenopyrite		6.5016e-14	2.58e-06	1.64856e-09			1.91197e-09	3.53715e-10	6.69e-06	3.40046e-05	1349.39	0.000741076			3499	0.185	2.52e-08	0.03	1565	0.000638978	Zhang et al. 2022a
Liaodong, North China	Maoling	MLR-2	Arsenopyrite		4.0414e-15	1.21e-06	5.26545e-10			5.70668e-10	1.00438e-10	1.93e-06	7.08187e-06	2120.32	0.000471627			3382	0.176	3.34e-09	0.27	2298	0.000435161	Zhang et al. 2022a
Liaodong, North China	Maoling	MLR-3	Arsenopyrite		1.8497e-13	4.44e-06	1.5242e-09			3.26386e-09	5.90759e-10	8.77e-06	5.66722e-05	1360.35	0.000735104			2687	0.181	4.166e-08	1.03	2913	0.000343289	Zhang et al. 2022a
Liaodong, North China	Maoling	MLR-4	Arsenopyrite		3.58737e-14	6.07e-06	6.21926e-09			1.89688e-09	3.33851e-10	5.96e-06	1.89119e-05	3199.99	0.000312501			3142	0.176	5.91e-09	0.41	976	0.00102459	Zhang et al. 2022a
Liaodong, North China	Maoling	MLR-5	Arsenopyrite		1.62797e-14	2.63e-06	1.16889e-09			2.1608e-09	5.29397e-10	5.16e-06	7.53409e-06	1217.14	0.000821598			2388	0.245	6.19e-09	0.08	2250	0.000444444	Zhang et al. 2022a
Liaodong, North China	Maoling	MLR-7	Arsenopyrite		3.94345e-14	6.65e-06	1.8534e-09			1.27962e-09	2.57204e-10	4.05e-06	3.08173e-05	5196.85	0.000192424			3165	0.201	5.93e-09	0.3	3588	0.000278707	Zhang et al. 2022a
Liaodong, North China	Maoling	DM-1	Arsenopyrite		4.023e-14	2.7e-06	2.72177e-09			1.60816e-09	3.10376e-10	1.97e-06	2.50161e-05	1678.93	0.000595616			1225	0.193	1.49e-08	0.568	992	0.00100806	Zhang et al. 2022a
Liaodong, North China	Maoling	DM-2	Arsenopyrite		2.541e-14	1.21e-06	9.40171e-10			1.17479e-09		1.64e-06	2.16295e-05	1029.98	0.000970897			1396	–	2.1e-08	1.7	1287	0.000777001	Zhang et al. 2022a
Liaodong, North China	Maoling	DM-3	Arsenopyrite		7.9606e-14	1.06e-06	9.4055e-10			1.31305e-09	2.50793e-10	3.28e-06	6.06268e-05	807.28	0.00123873			2498	0.191	7.51e-08	0.81	1127	0.000887311	Zhang et al. 2022a
Liaodong, North China	Maoling	DM-4	Arsenopyrite		1.35256e-13	2.12e-06	6.2908e-09			1.46783e-09	2.65677e-10	2.19e-06	9.2147e-05	1444.31	0.000692372			1492	0.181	6.38e-08	1.8	337	0.00296736	Zhang et al. 2022a
Liaodong, North China	Maoling	DM-5	Arsenopyrite		3.02621e-13	6.71e-06	7.28556e-09			1.19012e-09	2.22552e-10	1.59e-06	0.000254278	5638.09	0.000177365			1336	0.187	4.51e-08	0.63	921	0.00108578	Zhang et al. 2022a
Liaodong, North China	Maoling	DM-7	Arsenopyrite		2.4408e-14	3.6e-06	6.00601e-10			1.39186e-09		5.47e-06	1.75363e-05	2586.47	0.000386627			3930	–	6.78e-09	1.66544	5994	0.000166834	Zhang et al. 2022a
Liaodong, North China	Xinfang	19X-1	Galena			7.6e-09				1.44e-11	2.7216e-12	1.45e-08		527.778	0.00189474			1007.5	0.189					Zhang et al. 2022b
Liaodong, North China	Xinfang	19J-1	Pyrite		3.53276e-14	4.07e-08				6.06e-11	1.1514e-11	1.06e-07	0.000582964	671.617	0.00148894			1750.1	0.19	8.68e-07	0.62			Zhang et al. 2022b
Liaodong, North China	Xinfang	19Q-1	Galena			9.81e-10				7.2e-12	1.4184e-12	8.14e-09		136.25	0.00733945			1123.3	0.197					Zhang et al. 2022b
Liaodong, North China	Xinfang	19H-1	Pyrite		5.39e-15	2.75e-08				1.84e-11	3.4776e-12	1.31e-07	0.000292935	1494.57	0.000669091			7100.5	0.189	1.96e-07	0.14			Zhang et al. 2022b
Liaodong, North China	Xinfang	19K-1	Galena			5.84e-09				1.9e-11	3.629e-12	5.47e-08		307.368	0.00325342			2875.1	0.191					Zhang et al. 2022b
Liaodong, North China	Xinfang	19F-1	Pyrite		7.84e-15	1e-08				2.68e-11	5.1188e-12	1.53e-07	0.000292537	373.134	0.00268			5718.6	0.191	7.84e-07	0.56			Zhang et al. 2022b
Jiaodong, North China	Sanshandao	135M-TW1	Pyrite		9.384e-13	1.38e-05				2.61596e-09		1.737e-06	0.000358721	5275.3	0.000189563			664		6.8e-08	0.0484			Han et al. 2019
Jiaodong, North China	Sanshandao	390-TW1	Pyrite		5.7291e-13	3.39e-06				1.82582e-09		8.91e-07	0.000313782	1856.7	0.00053859			488		1.69e-07	0.1207			Han et al. 2019
Jiaodong, North China	Sanshandao	390-TW2	Pyrite		6.216e-13	2.1e-06				1.79206e-09		9.48e-07	0.000346863	1171.84	0.000853362			529		2.96e-07	0.2114			Han et al. 2019
Jiaodong, North China	Sanshandao	HZK8401TW3	Pyrite		7.676e-13	1.01e-05				2.73488e-09		1.537e-06	0.000280671	3693.04	0.00027078			562		7.6e-08	0.0543			Han et al. 2019
Jiaodong, North China	Sanshandao	HZK8401TW4	Pyrite		8.662e-13	1.42e-05				3.02128e-09		1.846e-06	0.0002867	4700	0.000212766			611		6.1e-08	0.0434			Han et al. 2019
Jiaodong, North China	Cangshan	Csh1	Pyrite		4.8319e-13	2.11e-07				1.34118e-09		5.7e-07	0.000360273	157.325	0.00635629			425		2.29e-06	1.64			Mao et al. 2005
Jiaodong, North China	Cangshan	Csh2	Pyrite		8.2212e-13	5.27e-07				3.7199e-09		1.421e-06	0.000221006	141.671	0.00705862			382		1.56e-06	1.11			Mao et al. 2005
Jiaodong, North China	Cangshan	Csh5	Pyrite		2.5021e-13	1.31e-07				8.14789e-09		2.314e-06	3.07086e-05	16.0778	0.0621976			284		1.91e-06	1.36			Mao et al. 2005
Jiaodong, North China	Cangshan	Csh6	Pyrite		1.46692e-12	8.06e-07				1.94607e-09		8.66e-07	0.000753787	414.169	0.00241448			445		1.82e-06	1.3			Mao et al. 2005
Jiaodong, North China	Cangshan	Csh7	Pyrite		7.076e-13	4.88e-07				4.67507e-09		1.669e-06	0.000151356	104.383	0.00958006			357		1.45e-06	1.04			Mao et al. 2005
Jiaodong, North China	Jiaojia	JJ-190-2	Pyrite		5.8483e-13	2.33e-07				4.08901e-10		2.94e-07	0.00143025	569.82	0.00175494			719		2.51e-06	1.79			Mao et al. 2005
Jiaodong, North China	Jiaojia	JJ-190-10	Pyrite		2.81464e-12	9.32e-07				4.94922e-09		2.534e-06	0.000568704	188.313	0.00531032			512		3.02e-06	2.16			Mao et al. 2005
Jiaodong, North China	Jiaojia	JJ-190-13	Pyrite		9.6691e-13	7.27e-07				3.74931e-09		1.361e-06	0.00025789	193.902	0.00515724			363		1.33e-06	0.95			Mao et al. 2005
Jiaodong, North China	Jiaojia	JJ-190-14	Pyrite		9.2092e-13	3.22e-07				1.06589e-09		5.5e-07	0.00086399	302.095	0.00331022			516		2.86e-06	2.04			Mao et al. 2005
Jiaodong, North China	Jiaojia	Jjia3	Pyrite		4.3672e-13	4.12e-07				1.88286e-09		6.59e-07	0.000231945	218.816	0.00457004			350		1.06e-06	0.76			Mao et al. 2005
Jiaodong, North China	Zhaodaoshan	Zk16-2-2	Pyrite		2.0664e-13	3.69e-06				1.88811e-09		8.1e-07	0.000109443	1954.33	0.000511683			429		5.6e-08	0.0433			Zhang 2010
Jiaodong, North China	Zhaodaoshan	Zk16-3-1	Pyrite		2.8728e-13	5.7e-07				1.05852e-09		4.16e-07	0.000271397	538.486	0.00185706			393		5.04e-07	0.36			Zhang 2010
Jiaodong, North China	Zhaodaoshan	Zk16-3-5	Pyrite		1.22094e-13	3.23e-07				3.31126e-11		2.3e-07	0.00368724	9754.6	0.000102516			6946		3.78e-07	0.27			Zhang 2010
Jiaodong, North China	Zhaodaoshan	Zk80-2-1	Pyrite		9.1042e-14	9.29e-07				3.04786e-10		2.42e-07	0.000298708	3048.04	0.00032808			794		9.8e-08	0.08			Zhang 2010
Jiaodong, North China	Zhaodaoshan	Zk120-1-1	Pyrite		2.842e-13	2.03e-06				1.89371e-10		3.1e-07	0.00150076	10719.7	9.32861e-05			1637		1.4e-07	0.1			Zhang 2010
Jiaodong, North China	Jinqingding	JQD-KD-2	Pyrite		2.23293e-13	3.43e-07				7.07368e-10		3.36e-07	0.000315667	484.896	0.0020623			475		6.51e-07	0.47			Chen 2010
Jiaodong, North China	Jinqingding	JQD-785-3	Pyrite		1.29066e-13	4.2e-08				2.26782e-10		1.05e-07	0.00056912	185.2	0.00539957			463		3.073e-06	2.2			Chen 2010
Jiaodong, North China	Jinqingding	JQD-585-13	Pyrite		8.5253e-14	6.41e-07				3.28297e-10		2.39e-07	0.000259683	1952.5	0.000512163			728		1.33e-07	0.1			Chen 2010
Jiaodong, North China	Jinqingding	JQD-635-01	Pyrite		6.416e-14	4.01e-07				1.10092e-10		1.08e-07	0.000582787	3642.42	0.000274543			981		1.6e-07	0.12			Chen 2010
Jiaodong, North China	Jinqingding	JQD-B10	Pyrite		1.70805e-13	9.65e-07				1.45889e-10		2.2e-07	0.00117079	6614.64	0.00015118			1508		1.77e-07	0.13			Chen 2010
Jiaodong, North China	Yinggezhuang	YGZS115-2	Pyrite		5.2572e-13	1.011e-05				2.21097e-10		4.15e-07	0.00237777	45726.4	2.18692e-05			1877		5.2e-08	0.04			Zhou 2010
Jiaodong, North China	Yinggezhuang	YGZS115-14	Pyrite		8.316e-13	2.97e-06				1.59395e-09		7.38e-07	0.000521722	1863.29	0.000536684			463		2.8e-07	0.2			Zhou 2010
Jiaodong, North China	Yinggezhuang	YGZN80-16	Pyrite		1.26976e-12	2.56e-06				1.86957e-09		1.29e-06	0.000679174	1369.3	0.000730299			690		4.96e-07	0.36			Zhou 2010
Jiaodong, North China	Yinggezhuang	YGZS75-2	Pyrite		6.783e-13	1.292e-06				8.72642e-10		5.55e-07	0.000777295	1480.56	0.000675419			636		5.25e-07	0.38			Zhou 2010
Jiaodong, North China	Yinggezhuang	YGZN80-30	Pyrite		2.37536e-13	4.16e-07				7.35614e-10		4.73e-07	0.000322908	565.514	0.0017683			643		5.71e-07	0.41			Zhou 2010
Jiaodong, North China	Tudui–Shawang	GC-15-2	Pyrite	I	6.22877e-13	2.91e-07				1.1161e-10		1.99e-07	0.00558085	2607.3	0.000383538			1783		2.14047e-06	1.53			Liu et al. 2021a
Jiaodong, North China	Tudui–Shawang	GC-16	Pyrite		1.36962e-12	3.56e-07				5.39617e-10		3.95e-07	0.00253813	659.727	0.00151578			732		3.84725e-06	2.75			Liu et al. 2021a
Jiaodong, North China	Tudui–Shawang	GC-19	Pyrite		6.38504e-13	2.8e-07				1.51587e-10		1.91e-07	0.00421212	1847.12	0.000541383			1260		2.28037e-06	1.63			Liu et al. 2021a
Jiaodong, North China	Tudui–Shawang	GC-21	Pyrite		4.98478e-13	1.11e-07				8.43786e-11		7.4e-08	0.00590763	1315.5	0.000760167			877		4.49079e-06	3.21			Liu et al. 2021a
Jiaodong, North China	Tudui–Shawang	GC-1	Pyrite	II	1.26959e-13	1.21e-07				1.04505e-10		5.8e-08	0.00121487	1157.84	0.000863674			555		1.04925e-06	0.75			Liu et al. 2021a
Jiaodong, North China	Tudui–Shawang	GC-3-1	Pyrite		1.9586e-13	8e-08				7.53138e-11		9e-08	0.00260059	1062.22	0.000941423			1195		2.44825e-06	1.75			Liu et al. 2021a
Jiaodong, North China	Tudui–Shawang	GC-3-2	Pyrite		1.75519e-13	8.2e-08				1e-10		6.5e-08	0.00175519	820	0.00121951			650		2.14047e-06	1.53			Liu et al. 2021a
Jiaodong, North China	Tudui–Shawang	GC-4	Pyrite		1.06828e-13	1.66e-07				2.34317e-10		1.27e-07	0.00045591	708.441	0.00141155			542		6.4354e-07	0.46			Liu et al. 2021a
Jiaodong, North China	Tudui–Shawang	GC-6	Pyrite		3.93399e-14	3.8e-08				1e-10		3.6e-08	0.000393399	380	0.00263158			360		1.03526e-06	0.74			Liu et al. 2021a
Jiaodong, North China	Tudui–Shawang	GC-8	Pyrite		2.07332e-13	3.9e-07				1.56275e-10		1.93e-07	0.00132671	2495.6	0.000400706			1235		5.3162e-07	0.38			Liu et al. 2021a
Jiaodong, North China	Tudui–Shawang	GC-9	Pyrite		7.78963e-14	6.4e-08				4.16667e-11		4.4e-08	0.00186951	1536	0.000651042			1056		1.21713e-06	0.87			Liu et al. 2021a
Jiaodong, North China	Tudui–Shawang	GC-11	Pyrite		1.65672e-12	4.59e-07				3.35492e-10		5.18e-07	0.00493819	1368.14	0.00073092			1544		3.60942e-06	2.58			Liu et al. 2021a
Jiaodong, North China	Nanxiaoyao		Pyrite		6.9e-15	2.309e-08				6.16649e-11		7.652e-08	0.000111895	374.443	0.00267063			1240.9		2.98831e-07	0.21			Meng et al. 2020
Jiaodong, North China	Nanxiaoyao		Pyrite		1.48e-14	6.159e-08				2.55171e-11		2.776e-08	0.000580004	2413.68	0.000414305			1087.9		2.40299e-07	0.17			Meng et al. 2020
Jiaodong, North China	Tudui	B0001-1	Pyrite		1.6713e-12	5.48e-07				1.86432e-09		1.484e-06	0.000896466	293.941	0.00340205			796		3.04982e-06	2.18			Tan et al. 2018
Jiaodong, North China	Tudui	K11	Pyrite		6.31187e-13	5.57e-07				6.41975e-09		3.12e-06	9.83195e-05	86.7635	0.0115256			486		1.13319e-06	0.81			Tan et al. 2018
Jiaodong, North China	Tudui	TK9	Pyrite		3.73113e-13	1.27e-07				5.54636e-10		3.35e-07	0.000672718	228.979	0.00436721			604		2.9379e-06	2.1			Tan et al. 2018
Jiaodong, North China	Tudui	TK29	Pyrite		7.30278e-13	5.8e-07				1.30792e-09		8.92e-07	0.000558352	443.453	0.00225503			682		1.2591e-06	0.9			Tan et al. 2018
Jiaodong, North China	Shawang	B0006-1	Pyrite		1.14719e-12	1.907e-06				1.40909e-09		1.24e-06	0.000814138	1353.35	0.000738905			880		6.0157e-07	0.43			Tan et al. 2018
Jiaodong, North China	Shawang	B0007-1	Pyrite		9.16541e-13	5.37e-07				4.35695e-09		1.599e-06	0.000210363	123.251	0.0081135			367		1.70678e-06	1.22			Tan et al. 2018
Jiaodong, North China	Shawang	SK1	Pyrite		1.28395e-12	3.84e-07				9.93092e-10		1.15e-06	0.00129288	386.671	0.00258618			1158		3.34361e-06	2.39			Tan et al. 2018
Jiaodong, North China	Shawang	B0030-1	Pyrite		2.91398e-13	1.31e-07				9.56589e-10		6.17e-07	0.000304622	136.945	0.00730221			645		2.22441e-06	1.59			Tan et al. 2018
Jiaodong, North China	Dongliujia	B0002-1	Pyrite		8.74431e-13	1.202e-06				1.00382e-09		1.052e-06	0.000871106	1197.43	0.000835122			1048		7.2748e-07	0.52			Tan et al. 2018
Jiaodong, North China	Dongliujia	B0005-1	Pyrite		7.79831e-13	5.93e-07				1.68372e-09		1.613e-06	0.00046316	352.197	0.00283932			958		1.31506e-06	0.94			Tan et al. 2018
Jiaodong, North China	Dongliujia	DK5	Pyrite		1.1589e-12	1.358e-06				1.31024e-09		1.343e-06	0.000884495	1036.45	0.000964834			1025		8.5339e-07	0.61			Tan et al. 2018
Jiaodong, North China	Dongliujia	B0004-1	Pyrite		2.37385e-12	2.293e-06				2.13713e-09		2.291e-06	0.00111077	1072.94	0.000932022			1072		1.03526e-06	0.74			Tan et al. 2018
Jiaodong, North China	Dongliujia	B0020-1	Pyrite		4.76318e-12	1.755e-06				7.88834e-09		6.429e-06	0.000603825	222.48	0.00449478			815		2.71406e-06	1.94			Tan et al. 2018
Jiaodong, North China	Longkou	B0009-1	Pyrite		1.35717e-13	8.9e-08				1.3255e-09		7.33e-07	0.000102389	67.1446	0.0148932			553		1.52491e-06	1.09			Tan et al. 2018
Jiaodong, North China	Longkou	B0031-1	Pyrite		1.63095e-12	1.005e-06				1.43324e-09		3.027e-06	0.00113795	701.209	0.00142611			2112		1.62284e-06	1.16			Tan et al. 2018
Jiaodong, North China	Longkou	LK17	Pyrite		1.12032e-12	1.04e-06				2.70962e-09		1.493e-06	0.00041346	383.818	0.0026054			551		1.07723e-06	0.77			Tan et al. 2018
Jiaodong, North China	Liaoshang	LK30	Pyrite		6.54536e-13	2.98e-07				8.14855e-10		7.57e-07	0.000803255	365.709	0.00273441			929		2.19643e-06	1.57			Tan et al. 2018
Jiaodong, North China	Liaoshang	LK31	Pyrite		7.9813e-13	3.26e-07				2.56326e-09		1.479e-06	0.000311373	127.182	0.00786276			577		2.44825e-06	1.75			Tan et al. 2018
Jiaodong, North China	Liaoshang	LK32	Pyrite		2.53639e-13	1.85e-07				1.21868e-09		5.74e-07	0.000208125	151.803	0.00658748			471		1.37102e-06	0.98			Tan et al. 2018
Jiaodong, North China	Liaoshang	LK34	Pyrite		3.48169e-13	6.07e-07				8.50258e-10		4.94e-07	0.000409486	713.901	0.00140075			581		5.7359e-07	0.41			Tan et al. 2018
Jiaodong, North China	Jiaojia	MB16	Pyrite		3.5244e-12	1.068e-06												679		3.3e-06	2.36			Zhang et al. 2008
Jiaodong, North China	Jiaojia	JJA-15	Pyrite		2.256e-12	7.52e-07												500		3e-06	2.14			Zhang et al. 2008
Jiaodong, North China	Jiaojia	JCH20	Pyrite		8.993e-13	3.91e-07												1148		2.3e-06	1.64			Zhang et al. 2008
Jiaodong, North China	Denggezhuang	DJN-4	Pyrite		8.991e-13	3.33e-07												756		2.7e-06	1.93			Zhang et al. 2008
Jiaodong, North China	Denggezhuang	DGZ-3	Pyrite		3.75e-13	1.25e-07												680		3e-06	2.14			Zhang et al. 2008
Jiaodong, North China	Denggezhuang	BP-41	Pyrite		1.171e-12	1.171e-06												368		1e-06	0.71			Zhang et al. 2008
Jiaodong, North China	Pengjiakuang	BP-9B	Pyrite		6.864e-13	6.24e-07												393		1.1e-06	0.79			Zhang et al. 2008
Jiaodong, North China	Pengjiakuang	FA-9	Pyrite		8.196e-13	1.366e-06												314		6e-07	0.43			Zhang et al. 2008
Jiaodong, North China	Pengjiakuang	FA-52	Pyrite		7.512e-13	1.412e-06												310		5e-07	0.38			Zhang et al. 2008
Jiaodong, North China	Jiaojia	09 J93	Pyrite		1.549e-12	6.33e-07				4.65e-10			0.00333118	1361.29	0.000734597			3896.25		2.44708e-06	1.77			Zhang et al. 2008
Jiaodong, North China	Jiaojia	09 J69	Pyrite		4.92e-12	1.21e-06				9.87e-10		3.571e-06	0.0049848	1225.94	0.000815702			3619.42		4.06612e-06	2.94			Zhang et al. 2008
Jiaodong, North China	Xincheng	09XC55	Pyrite		8.4e-13	4.71e-07				1.513e-09		1.906e-06	0.000555188	311.302	0.00321231			1259.64		1.78344e-06	1.29			Zhang et al. 2008
Jiaodong, North China	Xincheng	10XC09	Pyrite		2.879e-12	1.082e-06				6.52e-10		3.865e-06	0.00441564	1659.51	0.000602588			5926.44		2.66081e-06	1.92			Zhang et al. 2008
Jiaodong, North China	Sanshandao	Z4963-62	Pyrite		2.433e-12	1.218e-06				3.32e-10		4.51e-07	0.00732831	3668.67	0.000272578			1359.96		1.99754e-06	1.44			Zhang et al. 2008
Jiaodong, North China	Sanshandao	Z4963-52	Pyrite		5.42e-13	5.77e-07				7.15e-10		6.01e-07	0.000758042	806.993	0.00123917			840.88		9.39341e-07	0.68			Zhang et al. 2008
Jiaodong, North China	Sanshandao	z480-11-4	Pyrite		1.046e-12	7.38e-07				1.746e-09		5.975e-06	0.000599084	422.68	0.00236585			3422.02		1.41734e-06	1.02			Zhang et al. 2008
Jiaodong, North China	Sanshandao	z4809-4	Pyrite		9.65e-13	6.33e-07				6.64e-10		6.59e-07	0.00145331	953.313	0.00104897			992.91		1.52449e-06	1.1			Zhang et al. 2008
Jiaodong, North China	Sanshandao	z4965-105	Pyrite		5.24e-13	6.63e-07				2.397e-09		5.57e-06	0.000218607	276.596	0.00361538			2323.48		7.90347e-07	0.57			Zhang et al. 2008
Jiaodong, North China	Sanshandao	z4965-168	Pyrite		9.66e-13	4.77e-07				4.142e-09		4.499e-06	0.000233221	115.162	0.00868344			1086.05		2.02516e-06	1.47			Zhang et al. 2008
Jiaodong, North China	Sanshandao	z4965-190	Pyrite		1.0116e-11	3.524e-06				4.851e-09		2.8566e-05	0.00208534	726.448	0.00137656			5888.33		2.8706e-06	2.07			Zhang et al. 2008
Jiaodong, North China	Sanshandao	z4965-224	Pyrite		2.88e-13	1.446e-06				2.134e-09		2.281e-06	0.000134958	677.601	0.0014758			1069.03		1.9917e-07	0.14			Zhang et al. 2008
Jiaodong, North China	Sanshandao	z4966-24a	Pyrite		1.649e-12	5.19e-07				2.794e-09		1.3482e-05	0.000590193	185.755	0.00538343			4825.5		3.17726e-06	2.3			Zhang et al. 2008
Jiaodong, North China	Sanshandao	z4966-76	Pyrite		1.851e-12	1.18e-06				3.041e-09		5.27e-06	0.000608681	388.03	0.00257712			1733.25		1.56864e-06	1.13			Zhang et al. 2008
Jiaodong, North China	Sanshandao	z4966-91	Pyrite		1.972e-12	9.01e-07				3.776e-09		9.657e-06	0.000522246	238.612	0.0041909			2557.44		2.18868e-06	1.58			Zhang et al. 2008
Jiaodong, North China	Panzijian	PAJ-04	Pyrite	Ⅲ	3.55e-14	2.46e-08				3.776e-09		1.07e-07	9.40148e-06	6.51483	0.153496			896.3		1.44e-06	1.03			Mao et al. 2020
Jiaodong, North China	Panzijian	PZJ-07	Pyrite	Ⅱ	4.12e-14	3.63e-08				3.776e-09		1.02e-07	1.0911e-05	9.61335	0.104022			979.9		1.13e-06	0.96			Mao et al. 2020
Jiaodong, North China	Panzijian	PZJ-08	Pyrite	Ⅱ	3.49e-14	2.6e-08				3.776e-09		1.71e-07	9.24258e-06	6.88559	0.145231			1149.9		1.34e-06	0.81			Mao et al. 2020
Jiaodong, North China	Panzijian	PZJ-15	Pyrite	Ⅲ	8.5e-14	5.06e-08				3.776e-09		2.65e-07	2.25106e-05	13.4004	0.0746245			1724.1		1.68e-06	1.2			Mao et al. 2020
Jiaodong, North China	Yi'nan	LJ-29-2	Pyrite		2.82038e-13	1.8e-07				7.5e-10		2.07e-07	0.000376051	240	0.00416667			826	n.a.	1.56688e-06	1.12			Liu et al. 2014
Jiaodong, North China	Yi'nan	LJ-29-5	Pyrite		3.93511e-13	5.86e-07				7.5e-10		1.1e-07	0.000524681	781.333	0.00127986			439.4	n.a.	6.7152e-07	0.48			Liu et al. 2014
Jiaodong, North China	Yi'nan	LJ-29-7	Pyrite		1.63557e-13	4.33e-07				7.5e-10		2.28e-07	0.000218076	577.333	0.0017321			460.4	n.a.	3.7773e-07	0.27			Liu et al. 2014
Jiaodong, North China	Yi'nan	TJ-2	Pyrite		3.45665e-13	2.059e-06				7.5e-10	1.2e-10	9.16e-07	0.000460887	2745.33	0.000364254			458	0.16	1.6788e-07	0.12			Liu et al. 2021b
Jiaodong, North China	Yi'nan	TJ-8	Pyrite		4.81676e-14	3.13e-07				7.5e-10	7.5e-12	2.56e-07	6.42234e-05	417.333	0.00239617			364.1	0.01	1.5389e-07	0.11			Liu et al. 2021b
Jiaodong, North China	Yi'nan	TJ-1	Pyrite		3.89566e-13	2.73e-07				7.5e-10		5.73e-07	0.000519421	364	0.00274725			454.7	b.d.	1.42698e-06	1.02			Liu et al. 2021b
Jiaodong, North China	Qibaoshan	QBSH-10	Pyrite		1.19455e-12	4.494e-06				7.5e-10		2.78e-07	0.00159273	5992	0.000166889			842.4	b.d.	2.6581e-07	0.19			Liu et al. 2021b
Jiaodong, North China	Qibaoshan	QRSH-8	Pyrite		4.06689e-14	1.53e-07				7.5e-10	1.65e-10	7.53e-07	5.42252e-05	204	0.00490196			297.5	0.22	2.6581e-07	0.19			Liu et al. 2021b
Jiaodong, North China	Longquanzhan	LQZ-2	Pyrite		1.14578e-12	1.05e-06				7.5e-10		5.85e-07	0.00152771	1400	0.000714286			577.1	b.d.	1.09122e-06	0.78			Liu et al. 2021b
Jiaodong, North China	Longquanzhan	LQZ-3	Pyrite		1.46979e-13	6.18e-07				7.5e-10	1.425e-10	5.69e-07	0.000195972	824	0.00121359			893.6	0.19	2.3783e-07	0.17			Liu et al. 2021b
Jiaodong, North China	Longquanzhan	LQZ-4	Pyrite		1.46503e-13	3.74e-07				7.5e-10	1.425e-10	4.52e-07	0.000195338	498.667	0.00200535			1142.4	0.19	3.9172e-07	0.28			Liu et al. 2021b
Jiaodong, North China	Longquanzhan	LQZ-5	Pyrite		1.61389e-13	7.21e-07				7.5e-10	1.425e-10	5.05e-07	0.000215185	961.333	0.00104022			1559.1	0.19	2.2384e-07	0.16			Liu et al. 2021b
Jiaodong, North China	Longquanzhan	Zk5201-H64	Pyrite		2.88418e-13	8.59e-07				7.5e-10		7.99e-07	0.000384557	1145.33	0.000873108			1811	n.a.	3.3576e-07	0.24			Hu et al. 2007
Jiaodong, North China	Longquanzhan	Sly-47	Pyrite		1.88026e-14	9.6e-08				7.5e-10		2.81e-07	2.50701e-05	128	0.0078125			482	n.a.	1.9586e-07	0.14			Hu et al. 2007
Jiaodong, North China	Xiadian	XD-3	Pyrite		3.8437e-14	2.89e-08				8.17138e-11	1.57708e-11	1.11e-07	0.000470386	353.674	0.00282747			1358.4	0.193	1.33e-06	0.95			Du et al. 2019
Jiaodong, North China	Xiadian	XD-6	Pyrite		2.929e-14	5.05e-08				8.27186e-11	1.51375e-11	8.41e-08	0.000354092	610.504	0.00163799			1016.7	0.183	5.8e-07	0.42			Du et al. 2019
Jiaodong, North China	Xiadian	XD-12	Pyrite		3.1824e-14	4.08e-08				8.55526e-11	1.59128e-11	6.2e-08	0.000371981	476.899	0.00209688			724.7	0.186	7.8e-07	0.56			Du et al. 2019
Jiaodong, North China	Xiadian	XD-17	Pyrite		5.472e-14	2.88e-08				1.18249e-10	2.25855e-11	9.83e-08	0.000462754	243.555	0.00410585			831.3	0.191	1.9e-06	1.36			Du et al. 2019
Jiaodong, North China	Jinchiling	YT-110-4	Pyrite		4.13e-13	3.69e-07				2.01e-09	4.5828e-10	7.73e-07	0.000205473	183.582	0.00544715			383.7	0.228	1.1192e-06	0.8			Zhang et al. 2012
Jiaodong, North China	Jinchiling	YT-110-8	Pyrite		5.1e-13	2.59e-07				1.63e-09	3.10678e-10	7.29e-07	0.000312883	158.896	0.00629344			448.5	0.1906	2.11249e-06	1.51			Zhang et al. 2012
Jiaodong, North China	Jinchiling	YT-110-10	Pyrite		5.47e-13	2.48e-07				1.27e-09	0	5.77e-07	0.000430709	195.276	0.00512097			456.1		2.05653e-06	1.47			Zhang et al. 2012
Jiaodong, North China	Jinchiling	YT-190-21	Pyrite		1.31e-13	1.065e-06				4.5e-10	9.27e-11	1.64e-07	0.000291111	2366.67	0.000422535			356.9	0.206	1.2591e-07	0.09			Zhang et al. 2012
Jiaodong, North China	Jinchiling	YT-190-23	Pyrite		2.9e-13	9.62e-07				8e-11		3.38e-07	0.003625	12025	8.31601e-05			4042.6		3.0778e-07	0.22			Zhang et al. 2012
Jiaodong, North China	Jinchiling	YT-270-3	Pyrite		4.99e-13	6.4e-07				7.9e-10		4.17e-07	0.000631646	810.127	0.00123438			530.6		7.8344e-07	0.56			Zhang et al. 2012
Jiaodong, North China	Jinchiling	YT-380-5	Pyrite		8.76e-13	8.57e-07				2.14e-09		9.71e-07	0.000409346	400.467	0.00249708			453.5		1.02127e-06	0.73			Zhang et al. 2012
Jiaodong, North China	Jinchiling	YT-380-8	Pyrite		3.43e-13	6.66e-07				7.5e-10		3.75e-07	0.000457333	888	0.00112613			502.9		5.1763e-07	0.37			Zhang et al. 2012
Xiaoqinling, North China	Fancha	FCSM1-1	Pyrite	II	1.69615e-12	1.417e-06				2.45268e-10		1.0198e-06	0.00691549	5777.35	0.00017309			4157.9		1.197e-06	0.85			Liu et al. 2020
Xiaoqinling, North China	Fancha	FCSM1-2	Pyrite	II	1.34464e-12	1.408e-06				1.85613e-10		1.3706e-06	0.00724434	7585.7	0.000131827			7384.2		9.55e-07	0.68			Liu et al. 2020
Xiaoqinling, North China	Fancha	FC1026-7	Pyrite	II	1.54216e-12	1.5915e-06				2.3685e-10		1.2034e-06	0.00651115	6719.45	0.000148822			5080.86		9.69e-07	0.69			Liu et al. 2020
Xiaoqinling, North China	Fancha	MNG-2	Pyrite	II	1.22159e-12	9.634e-07				2.05229e-09		1.4711e-06	0.000595234	469.427	0.00213025			716.81		1.268e-06	0.91			Liu et al. 2020
Xiaoqinling, North China	Fancha	MNG-3	Pyrite	II	1.22335e-12	7.464e-07				2.01066e-09		1.3201e-06	0.000608431	371.221	0.00269381			656.55		1.639e-06	1.17			Liu et al. 2020
Xiaoqinling, North China	Fancha	FCS17-2	Pyrite	III	1.08551e-12	2.3701e-06				2.52492e-10		2.2506e-06	0.00429917	9386.83	0.000106532			8913.55		4.58e-07	0.33			Liu et al. 2020
Xiaoqinling, North China	Fancha	FC1340-19	Pyrite	III	1.11471e-12	3.3677e-06				4.20404e-10		1.3493e-06	0.00265152	8010.62	0.000124834			3209.53		3.31e-07	0.24			Liu et al. 2020
Xiaoqinling, North China	Fancha	FC1060-9	Pyrite	III	7.11825e-13	1.9828e-06				3.01084e-10		6.066e-07	0.00236421	6585.54	0.000151848			2014.72		3.59e-07	0.26			Liu et al. 2020
Xiaoqinling, North China	Fancha	FC1340-41	Pyrite	III	1.281e-12	4.575e-06				2.04688e-09		2.479e-06	0.00062583	2235.11	0.000447406			1211.11		2.8e-07	0.2			Liu et al. 2020
Xiaoqinling, North China	Fancha	MNG-1	Pyrite	III	1.07452e-12	3.0966e-06				2.1511e-09		1.3932e-06	0.000499522	1439.55	0.000694664			647.67		3.47e-07	0.25			Liu et al. 2020
Xiaoqinling, North China		516HY4	Pyrite	II	1.6032e-11	6.68e-06				5.95918e-10		5.84e-07	0.026903	11209.6	8.92093e-05			980		2.4e-06	1.71			Wang et al. 2005
Xiaoqinling, North China		522GZ1	Pyrite	II	5.148e-12	3.96e-06				3.40136e-10		2e-07	0.0151351	11642.4	8.58929e-05			588		1.3e-06	0.93			Wang et al. 2005
Xiaoqinling, North China		614YL1	Pyrite	II	1.349e-12	7.1e-07				1.55483e-10		9.5e-08	0.0086762	4566.42	0.00021899			611		1.9e-06	1.36			Wang et al. 2005
Xiaoqinling, North China		512XY22	Pyrite	II	2.704e-12	1.04e-06				7.74086e-10		4.66e-07	0.00349315	1343.52	0.000744314			602		2.6e-06	1.86			Wang et al. 2005
Xiaoqinling, North China		512XY22	Quartz	II	2.08e-13	5.2e-07				1.57013e-09		1.377e-06	0.000132473	331.184	0.00301947			877		4e-07	0.29			Wang et al. 2005
Xiaoqinling, North China		517HY6	Pyrite	III	1.375e-12	2.75e-06				4.26796e-10		3.09e-07	0.00322168	6443.37	0.000155198			724		5e-07	0.36			Wang et al. 2005
Xiaoqinling, North China		517HY6	Chalcopyrite	III	1.4e-13	3.5e-07				4.79042e-11		8e-08	0.0029225	7306.25	0.000136869			1670		4e-07	0.29			Wang et al. 2005
Xiaoqinling, North China		517HY6	Galena	III						7.31183e-11		3.4e-08						465			–			Wang et al. 2005
Xiaoqinling, North China		519 MJ1	Galena	III						1.33333e-10		4.6e-08						345			–			Wang et al. 2005
Xiaoqinling, North China		519 MJ1	Pyrite	III	6.648e-12	1.108e-05				3.00809e-09		1.116e-06	0.00221004	3683.41	0.000271488			371		6e-07	0.43			Wang et al. 2005
Xiaoqinling, North China	Lianzigou	13LZG-19	Pyrite		4.6305e-12	1.89e-06				4.34503e-10		6.68e-07	0.010657	4349.8	0.000229896			1537.39		2.45e-06	1.75			Wang et al. 2018
Xiaoqinling, North China	Lianzigou	13LZG-69	Pyrite		3.3e-12	1.1e-06				1.43579e-10		4.16e-07	0.0229839	7661.29	0.000130526			2897.36		3e-06	2.14			Wang et al. 2018
Xiaoqinling, North China	Lianzigou	13LZG-77	Pyrite		7.332e-13	9.4e-07				1.02865e-10		1.16e-07	0.00712778	9138.18	0.000109431			1127.69		7.8e-07	0.55			Wang et al. 2018
Xiaoqinling, North China	Qiangma	QM7	Pyrite		1.14072e-13	2.037e-07												–		5.6e-07	0.4			Li et al. 2012a
Xiaoqinling, North China	Qiangma	QM18	Pyrite		7.60704e-14	5.66e-08												–		1.344e-06	0.96			Li et al. 2012a
Xiaoqinling, North China	Qiangma	QM20	Pyrite		3.22022e-13	1.797e-07				3.61991e-10		1.6e-07	0.000889587	496.421	0.00201442			442		1.792e-06	1.28			Li et al. 2012a
Xiaoqinling, North China	Qiangma	QM26	Pyrite		1.3589e-13	1.103e-07				1.31579e-10		8e-08	0.00103276	838.28	0.00119292			608		1.232e-06	0.88			Li et al. 2012a
Xiaoqinling, North China	Chen'er	CE48	Pyrite		2.26464e-13	1.685e-07				4.21836e-10		1.7e-07	0.000536853	399.444	0.00250348			403		1.344e-06	0.96			Li et al. 2012a
Xiaoqinling, North China	Chen'er	CE29	Pyrite		7.7007e-13	4.825e-07				3.30189e-10		2.1e-07	0.00233221	1461.29	0.000684329			636		1.596e-06	1.14			Li et al. 2012a
Xiaoqinling, North China	Chen'er	CE30	Pyrite		2.38854e-13	2.585e-07				2.38095e-10		1.2e-07	0.00100319	1085.7	0.000921065			504		9.24e-07	0.66			Li et al. 2012a
Xiaoqinling, North China	Chen'er	CE77	Pyrite		8.89504e-14	4.18e-08												–		2.128e-06	1.52			Li et al. 2012a
Xiaoqinling, North China	Dongtongyu	DT2	Pyrite		1.38174e-13	9.49e-08				2.63158e-10		1e-07	0.000525063	360.62	0.002773			380		1.456e-06	1.04			Li et al. 2012a
Xiaoqinling, North China	Dongtongyu	DT32	Pyrite		2.446e-13	1.574e-07				4.26966e-10		1.9e-07	0.000572878	368.647	0.00271262			445		1.554e-06	1.11			Li et al. 2012a
Xiaoqinling, North China	Dongtongyu	DT44	Pyrite		2.53736e-13	1.576e-07				1.5083e-10		1e-07	0.00168227	1044.89	0.00095704			663		1.61e-06	1.15			Li et al. 2012a
Xiaoqinling, North China	Dongtongyu	DT77	Pyrite		1.30875e-13	1.087e-07				3.81862e-10		1.6e-07	0.000342728	284.658	0.00351299			419		1.204e-06	0.86			Li et al. 2012a
Xiaoqinling, North China	Qinnan	QN31	Pyrite		3.71043e-12	2.7898e-06												–		1.33e-06	0.95			Li et al. 2012a
Xiaoqinling, North China	Qinnan	QN32	Pyrite		1.39048e-13	1.528e-07												–		9.1e-07	0.65			Li et al. 2012a
Xiaoqinling, North China	Qinnan	QN40	Pyrite		1.21683e-12	1.7738e-06												–		6.86e-07	0.49			Li et al. 2012a
Xiaoqinling, North China	Qiaoshangzhai	QSZ23	Pyrite		1.554e-14	3.7e-08												–		4.2e-07	0.3			Li et al. 2012a
Xiaoqinling, North China	Qiaoshangzhai	QSZ24	Pyrite		4.7124e-15	1.53e-08												–		3.08e-07	0.22			Li et al. 2012a
Xiaoqinling, North China	Jinqu	17JQ-23	Pyrite	II	1.27372e-12	6.55e-07				1.39685e-09		7.92e-06	0.000911851	468.912	0.0021326			5669.9	0.2	1.94461e-06	1.39			Chang et al. 2022
Xiaoqinling, North China	Jinqu	17JQ-50	Pyrite	II	6.32488e-13	3.3e-07				2.68841e-09		6.15e-06	0.000235265	122.749	0.00814669			2287.6	0.19	1.91663e-06	1.37			Chang et al. 2022
Xiaoqinling, North China	Jinqu	17JQ-A38	Pyrite	III	4.12425e-13	3.35e-07				1.90895e-09		5.12e-06	0.000216048	175.489	0.00569836			2682.1	0.19	1.23112e-06	0.88			Chang et al. 2022
Xiaoqinling, North China	Jinqu	17JQ-A18	Pyrite	III	4.97596e-13	3.12e-07				2.53147e-09		7.38e-06	0.000196564	123.248	0.00811369			2915.3	0.19	1.59486e-06	1.14			Chang et al. 2022
Xiaoqinling, North China	Shenjiayao	B404-7	Pyrite	II	4.8035e-13	5.267e-07				9.76889e-10	1.83281e-10	5.495e-07	0.000491714	539.161	0.00185473			562.5	0.187617	9.12e-07	0.65			Tan et al. 2022
Xiaoqinling, North China	Shenjiayao	ZKS301-10	Pyrite	II	4.75e-14	1.9e-07				5.58422e-10	1.04183e-10	1.84e-07	8.50611e-05	340.245	0.00293906			329.5	0.186567	2.5e-07	0.18			Tan et al. 2022
Xiaoqinling, North China	Shenjiayao	ZKS301-21	Pyrite	II	2.58003e-12	1.635e-06				2.54386e-09	4.76378e-10	1.769e-06	0.00101422	642.724	0.00155588			695.4	0.187266	1.578e-06	1.13			Tan et al. 2022
Xiaoqinling, North China	Shenjiayao	B206-12	Pyrite	III	2.52508e-12	2.1237e-06				2.90159e-09	5.46439e-10	2.462e-06	0.00087024	731.909	0.00136629			848.5	0.188324	1.189e-06	0.85			Tan et al. 2022
Xiaoqinling, North China	Shenjiayao	CHG-3–1	Pyrite	III	7.79664e-13	5.92e-07				1.01129e-09	1.89736e-10	3.94e-07	0.000770957	585.389	0.00170827			389.6	0.187617	1.317e-06	0.94			Tan et al. 2022
Xiaoqinling, North China	Shenjiayao	CHG-3–2	Pyrite	III	6.51694e-13	6.53e-07				1.05075e-09	1.9751e-10	3.83e-07	0.000620215	621.458	0.00160912			364.5	0.18797	9.98e-07	0.71			Tan et al. 2022
Xiaoqinling, North China	Yangzhaiyu	YZY8	Pyrite		7.75284e-14	3.67e-08	2.7e-10									9.79	0.029			2.11249e-06	1.51		0.00735695	Li et al. 2012b
Xiaoqinling, North China	Yangzhaiyu	YZY11	Pyrite		5.12658e-13	4.261e-07	2.5e-10									9.89	0.029			1.20314e-06	0.86		0.000586717	Li et al. 2012b
Xiaoqinling, North China	Yangzhaiyu	YZY21	Pyrite		3.08798e-13	3.246e-07	5e-10									9.68	0.029			9.5132e-07	0.68		0.00154036	Li et al. 2012b
Xiaoqinling, North China	Yangzhaiyu	YZY99	Pyrite		5.11071e-13	1.1416e-06	8.5e-10									9.9	0.029			4.4768e-07	0.32		0.000744569	Li et al. 2012b
Porphyry	Wuziqilong	WZQL-1	Pyrite		1.28043e-12	1.839e-07				4.18442e-10		1.611e-07	0.00306	439.488	0.00227538			385		6.96265e-06	5.01			Wu et al. 2018
Porphyry	Wuziqilong	WZQL-3	Pyrite		4.19056e-13	1.041e-07				3.55132e-10		1.211e-07	0.00118	293.13	0.00341145			341		4.02551e-06	2.89			Wu et al. 2018
Porphyry	Wuziqilong	WZQL-4	Pyrite		2.66205e-13	4.82e-08				2.71637e-10		9.29e-08	0.00098	177.442	0.00563563			342		5.52292e-06	3.99			Wu et al. 2018
Porphyry	Wuziqilong	WZQL-5-2	Pyrite		1.66936e-12	2.181e-07				1.36833e-09		4.666e-07	0.00122	159.392	0.00627386			341		7.65411e-06	5.5			Wu et al. 2018
Porphyry	Wuziqilong	WZQL-8	Pyrite		2.38584e-13	1.981e-07				2.25079e-10		7.09e-08	0.00106	880.134	0.00113619			315		1.20436e-06	0.87			Wu et al. 2018
Porphyry	Wuziqilong	WZQL-10	Pyrite		4.33494e-13	6e-08				1.18765e-10		4.81e-08	0.00365	505.198	0.00197942			405		7.2249e-06	4.99			Wu et al. 2018
Porphyry	Wuziqilong	WZQL-14	Pyrite		1.74462e-13	4.77e-08				3.58974e-11		1.68e-08	0.00486	1328.79	0.000752567			468		3.65747e-06	2.63			Wu et al. 2018
Porphyry	Zijingshan	ZJS-3	Pyrite		5.79225e-13	7.7e-08				4.01961e-11		2.46e-08	0.01441	1915.61	0.000522027			612		7.52241e-06	5.41			Wu et al. 2018
Porphyry	Zijingshan	ZJS-4	Pyrite		5.6783e-13	2.57e-06				1.16598e-10		5.62e-08	0.00487	22041.6	4.53687e-05			482		2.20945e-07	0.16			Wu et al. 2018
Porphyry	Zijingshan	ZJS-6	Pyrite		2.8806e-12	3.655e-07				3.60075e-10		1.93e-07	0.008	1015.07	0.000985156			536		7.88125e-06	5.67			Wu et al. 2018
Porphyry	Zijingshan	ZJS-36	Digenite		1.74375e-14	2.92e-08				1.9375e-10		6.2e-08	9e-05	150.71	0.00663527			320		5.97175e-07	0.41			Wu et al. 2018
References
1	Bai Y, Zhu M, Zhang L, Huang K, Li W and Gao B (2019) Auriferous pyrite Re-Os geochronology and He-Ar isotopic compositions of the Jinchangyu Au deposit in the northern margin of the North China Craton. Ore Geology Reviews 111: 102948.
2	Chang M, Liu J, Santosh M, Yin C, Zhai D, Wang D and Wu T (2022) Fluid evolution characteristics and ore genesis in the Jinqu Au deposit, Qinling Orogen, China: Implications for ore genesis. Ore Geology Reviews 147: 104966.
3	Chen HY (2010) Genetic mineralogy and deep prospects of Jinqingding gold deposit in Rushan, East Shandong Province. MSc thesis. Beijing: China University of Geosciences (Beijing), pp 46-50 (in Chinese with English abstract).
4	Du F, Ji Y, Qi L and Ni C (2019) H-O, He-Ar and Sr-Nd-Pb isotopic constraints on the sources of ore-forming fluids and materials in the Xiadian gold deposit, Jiaodong. Geological Journal of China Universities 25: 686-696 (in Chinese with English abstract).
5	Feng H, Shen P, Zhu R, Li C, Ma G and Pan H (2019) Geology and He-Ar-S-Pb isotope constraints on the genesis of the Sidaogou gold deposit in Liaodong Peninsula, northeastern North China Craton. Ore Geology Reviews 113: 103080.
6	Han Z, Yu X, Li S, Tian J, Wang Z, Yu X and Wang L (2019) He-Ar isotopic tracing of pyrite from ore-forming fluids of the Sanshandao Au deposit, Jiaodong Area. Acta Geologica Sinica-English Edition 93: 1797-1807.
7	He J, Liu J, Li X, Wang X and Sun P (2023) Genesis of Tuanjiegou epithermal gold deposit in Heilongjiang province: Zircon U-Pb dating, element geochemistry and Hf-S-Pb-He isotopic evidence. Journal to Jilin University (Earth Science Edition) doi: 10.13278/j.cnki.jjuese.20210387 (in Chinese with English abstract).
8	Hu H, Sun A, Niu S, Wang B and Li Y (2007) Helium and argon isotopic compositions of the Longquanzhan gold deposit in the Yishu fault zone and their geological implications. Chinese Journal of Geochemistry 26: 46-51.
9	Kim KH, Lee S, Nagao K, Sumino H, Yang K and Lee JI (2012) He-Ar-H-O isotopic signatures in Au-Ag bearing ore fluids of the Sunshin epithermal gold-silver ore deposits, South Korea. Chemical Geology 320: 128-139.
10	Li CL, Li SR, Yuan MW, Du BY, Li WL, Alam M, Liu DY and Liu H (2020) Genesis of the Keluo Au deposit in the Nenjiang-Heihe tectonic melange belt, Heilongjiang Province: Evidence from chemical composition and pyrite He-Ar, S, Pb isotopes. Earth Science Frontiers 27: 99-115 (in Chinese with English abstract).
11	Li CL (2018) Gold metallogeny and prospecting in the Nenjiang-Heihe tectonic mélange zone, Heilongjiang Province. PhD thesis, China University of Geosciences (Beijing), pp 1-182 (in Chinese with English abstract).
12	Li JW, Bi SJ, Selby D, Chen L, Vasconcelos P, Thiede D, Zhou MF, Zhao XF, Li ZK and Qiu HN (2012a) Giant Mesozoic gold provinces related to the destruction of the North China craton. Earth and Planetary Science Letters 349-350: 26-37.
13	Li JW, Li ZK, Zhou MF, Chen L, Bi SJ, Deng XD, Qiu HN, Cohen B, Selby D and Zhao XF (2012b) The Early Cretaceous Yangzhaiyu lode gold deposit, North China Craton: A link between craton reactivation and gold veining. Economic Geology 107: 43-79.
14	Liu J, Wang Y, Hu Q, Wei R, Huang S, Sun Z and Hao J (2020) Ore genesis of the Fancha gold deposit, Xiaoqinling goldfield, southern margin of the North China Craton: Constraints from pyrite Re-Os geochronology and He-Ar, in-situ S-Pb isotopes. Ore Geology Reviews 119: 103373.
15	Liu J, Zhang LJ, Wang SL, Li TG, Yang Y, Liu FX, Li SH and Duan C (2019) Formation of the Wulong gold deposit, Liaodong gold Province, NE China: Constraints from zircon U-Pb age, sericite Ar-Ar age, and H-O-S-He isotopes. Ore Geology Reviews 109:130-143.
16	Liu XY, Tan J, He HY and Gan JR (2021) Origin of the Tudui-Shawang gold deposit, Jiaodong Peninsula, north China Craton: Constraints from fluid inclusion and H-O-He-Ar-S-Pb isotopic compositions. Ore Geology Reviews 133: 104125.
17	Liu Y, Santosh M, Li SR and Guo P (2014) Stable isotope geochemistry and Re-Os ages of the Yinan gold deposit, Shandong Province, northeastern China. International Geology Review 56: 695-710.
18	Mao GZ, He TL, Xu QL, Yang FJ, Cao MP, An PR, Dou YX, Yu XW, Liu XT, Meng LQ and Song LG (2020) He-Ar isotope geochemical characteristics of ore-forming fluids for Panzijian gold deposit in Jiaodong area of Shandong, China. Journal of Earth Sciences and Environment 42: 188-198 (in Chinese with English abstract).
19	Mao J, Li Y, Goldfarb R, He Y and Zaw K (2003) Fluid inclusion and noble gas studies of the Dongping gold deposit, Hebei Province, China: A mantle connection for mineralization? Economic Geology 98: 517-534.
20	Mao JW, Li XF, Zhang RH, Wang YT, Hao Y, Zhang ZH and Ling HF (2005) Mantle-derived fluid-related ore-forming system. Beijing: China Land Publishing House pp 95-120 (in Chinese).
21	Meng LQ, Mao GZ, Liu XT, An PR, Cao MP, Wang XJ, He TL, Song LG and Dou YX (2020) Geochemical studies of the Nanxiaoyao gold deposit in central Yishu fault zone, Shandong province, Eastern China. Solid Earth Sciences 5: 69-80 (in Chinese with English abstract).
22	Shen JF, Santosh M, Li SR, Li CP, Zhang JQ, Zhang SQ, Alam M, Wang YH and Xu KX (2020) He-Ar, S, Pb and O isotope geochemistry of the Dabaiyang gold deposit: Implications for the relationship between gold metallogeny and destruction of the North China Craton. Ore Geology Reviews 116: 103229.
23	Shi K, Wang K, Wang R, Ma X, Sun L and Yang H (2021) Geological, fluid inclusion, and O-C-S-Pb-He-Ar isotopic constraints on the genesis of the Honghuagou lode gold deposit, northern North China Craton. Geochemistry 81: 125807.
24	Sun J, Zhao J, Chen J, Keisuke N, Hirochika S, Shen K, Men L and Chen L (2008) Ore-forming mechanism for the Xiaoxinancha Au-rich Cu deposit in Yanbian, Jilin Province, China: Evidence from noble gas isotope geochemistry of fluid inclusions in minerals. Science in China Series D: Earth Sciences 51: 216-228 (in Chinese with English abstract).
25	Sun JG, Zhao JK, Liu JM, Chen JQ, Chen L and Men LJ (2006) He-Ar isotopic geochemistry of fluid inclusions research of Jinchanggouliang gold deposit, Inner Mongolia. Mineral Deposits 25: 193-196 (in Chinese with English abstract).
26	Tan J, Wei J, He H, Su F, Li Y, Fu L, Zhao S, Xiao G, Zhang F, Xu J and Liu Y (2018) Noble gases in pyrites from the Guocheng-Liaoshang gold belt in the Jiaodong province: Evidence for a mantle source of gold. Chemical Geology 480: 105-115.
27	Tang W, Ye H, Wang C, Li X and Shi H (2022) Textures, trace elements, sulfur, lead and He-Ar isotope analyses of pyrite: Implications for ore-forming processes and the origin of the Shenjiayao gold deposit, southern margin of the North China Craton. Ore Geology Reviews 150: 105195.
28	Wang B, Niu S, Sun A and Li H (2003) The isotopic composition of noble gases in gold deposits and the source of ore-forming materials in the region of North Hebei, China. Chinese Journal of Geochemistry 22: 313-319 (in Chinese with English abstract).
29	Wang D, Zhen S, Liu J, Carranza EJ, Wang J, Zha Z, Li Y and Bai H (2021) Mineral paragenesis and hydrothermal evolution of the Dabaiyang tellurium-gold deposit, Hebei Province, China: Constraints from fluid inclusions, H-O-He-Ar isotopes, and physicochemical conditions. Ore Geology Reviews 130: 103904.
30	Wang L, Liu JJ, Zhai DG, Zhu WB and Meng XY (2018) Material sources and ore-forming process of the Lianzigou gold deposit in Xiaoqinling. Acta Geologica Sinica 92: 341-358 (in Chinese with English abstract).
31	Wang YT, Ye HS, Ye AW, Li YG, Shuai Y, Zhang CQ and Dai JZ (2010) Re-Os age of molybdenite from the Majiawa Au-Mo deposit of quartz vein type in the north margin of the Xiaoqinling gold area and its implication for metallogeny. Earth Science Frontiers 17: 140-145 (in Chinese with English abstract).
32	Wu LY, Hu RZ, Li XF, Stuart FM, Jiang GH, Qi YQ and Zhu JJ (2018) Mantle volatiles and heat contributions in high sulfidation epithermal deposit from the Zijinshan Cu-Au-Mo-Ag ore field, Fujian Province, China: Evidence from He and Ar isotopes. Chemical Geology 480: 58-65.
33	Yu B, Zeng Q, Wang Y, He H and Su F (2017) The sources of ore-forming fluids from the Jinchang gold deposit, Heilongjiang province, NE China: Constraints from the He-Ar isotopic evidence. Resource Geology 67: 330-340.
34	Yu YX, Xu H, Wu XK, Yang LJ, Tian Z, Gao S and Wang QS (2012) Characteristics of the Au-Ag-Te minerals and its ore-forming fluids in Sandaowanzi gold deposit, Heilongjiang Province. Acta Petrologica Sinica 28: 345-356 (in Chinese with English abstract).
35	Zeng Q, Wang Z, He H, Wang Y, Zhang S and Liu J (2014) Multiple isotope composition (S, Pb, H, O, He, and Ar) and genetic implications for gold deposits in the Jiapigou gold belt, Northeast China. Mineralium Deposita 49: 145-64.
36	Zhai DG, Liu JJ, Edward MR and Wang JP (2015) Geochronological and He-Ar-S isotopic constraints on the origin of the Sandaowanzi gold-telluride deposit, northeastern China. Lithos 212: 338-352.
37	Zhang C, Wang E, Bi Z, Han R, Shao J, Liu B, Chen J and Zeng N (2019a) Geochronology and isotope geochemistry studies of an epithermal gold deposit in the northern Lesser Khingan Range, NE China: The Gaosongshan example. Ore Geology Reviews 105: 356-374.
38	Zhang L, Zhou X and Ding S (2008) Mantle-derived fluids involved in large-scale gold mineralization, Jiaodong district, China: Constraints provided by the He-Ar and H-O isotopic systems. International Geology Review 50: 472-482.
39	Zhang P, Kou L, Zhao Y and Sha D (2022) Genesis of the Maoling gold deposit in the Liaodong Peninsula: Constraints from a combined fluid inclusion, C-H-O-S-Pb-He-Ar isotopic and geochronological studies. Geoscience Frontiers 13: 101379.
40	Zhang P, Kou LL, Zhao Y, Bi ZW, Sha DM, Li ZM and Han RP (2019b) Fluid inclusions, HO, S, Pb, and noble gas isotope studies of the Baiyun gold deposit in the Qingchengzi ore field, NE China. Journal of Geochemical Exploration 200: 37-53.
41	Zhang P, Zhao Y, Kou L, Yang H, Sha D, Yang Z, Zhang J and Yu C (2022) Genesis of the Xinfang magmatic-hydrothermal gold deposit, Liaodong Peninsula, China: constraints from pyrite Re-Os isotopes, C, O, S, Pb, Si, He and Ar isotopes. Ore Geology Reviews 148: 105025.
42	Zhang X, Li SR and Lu J (2012) H-O, He-Ar isotopic compositions of fluid inclusions for tracing the source of ore-formation fluids of Jinchiling gold deposit, northwest Jiaodong area. Journal of Mineralogy and Petrology 32: 40-47 (in Chinese with English abstract).
43	Zhang YQ (2010) Genetic mineralogy and deep prospects of Zhaodaoshan gold deposit in Muping, east Shandong province. MSc thesis. Beijing: China University of Geosciences (Beijing), pp 1-96 (in Chinese with English abstract).
44	Zhao KQ, Sun JG, Li L, Men LJ, Nagao K and Chai P (2017) Origin and evolution of ore-forming fluids, and genesis of the Duhuangling and Jiusangou gold deposits in eastern Yanbian, northeast China. Canadian Journal of Earth Sciences 54: 393-408.
45	Zhen S, Wang Q, Wang D, Carranza EJ, Liu J, Pang Z, Cheng Z, Xue J, Wang J and Zha Z (2020) Genesis of the Zhangquanzhuang gold deposit in the northern margin of North China Craton: Constraints from deposit geology and ore isotope geochemistry. Ore Geology Reviews 122: 103511.
46	Zhou QF (2010) Genetic mineralogy and deep prospects of the Yinggezhuang gold deposit in Rushan County, Jiaodong. MSc thesis. Beijing: China University of Geosciences (Beijing), pp 1-97 (in Chinese with English abstract).
